# Supplementary material for: A novel text sentiment analysis system using improved depthwise separable convolution neural networks
Source: PeerJ Comput Sci. 2023 Feb 15;9:e1236. doi: 10.7717/peerj-cs.1236 (PMC10280403; doi:10.7717/peerj-cs.1236)
Supplement: Supplemental Information 2 — The number of sentiment classifications for this dataset is 2, positive and negative. The sentiment label of positive text is 1, and the sentiment label of negative text is 0. Some experimental data samples are shown in Table 2. [file peerj-cs-09-1236-s002.xlsx]

## Sheet: Sheet1
1. "It is close to Chuansha Highway, but the bus directions are incorrect. If it is" Cai Lu Line ", it will be very troublesome. It is recommended to use another route. The rooms are relatively simple."
1. The business king size room is very large, and the bed is 2M wide. I feel it is economical and good overall!
1. Breakfast is too bad. No matter how many people go there, there is no food. The hotel should pay attention to this problem. The room itself is very good.
1. The hotel is on a small street, and it is not easy to find it, but fortunately there are many enthusiastic compatriots in Beijing. The hotel facilities are similar to those introduced. The room is very small, indeed small, but with the low price factor, it is not worth it; The environment is good. It's in the alley, quiet and tidy. The heating is good - _ - | |... Oh, another advantage is that…
1, "There are no shops around the CBD center. It's a bit reluctant to say that there are five stars. I don't know why there is no hair dryer in the bathroom"
1. Generally speaking, such a hotel is OK with such a price. I hope he can quickly decorate it to leave a good impression on my guests
1. Hotels with good price ratio. This upgrade is free. Thank the front desk attendant. The house is OK, the carpet is new, better than last time. Many people have to go early for breakfast.
1. Not bad. It should be recommended among hotels of the same level!
1. I felt very good when I stayed in Lijing. Because it is a new hotel, it does have a light smell of paint, and the room is relatively new. The room size is appropriate, the bathroom is fully equipped, and the service attitude is also very good. The Internet speed may have improved. I feel it's OK. There are free patch panels, fruit knives... A series of daily necessities were provided free of c…
1,1. The hotel is quite new, the decoration and facilities are pretty good, but the room smells of paint. 2。 Breakfast was OK, but there were not many varieties. 3。 The transportation is quite convenient. There are many small restaurants around.
1. I live in a special standard room. The so-called characteristics are similar to home. Bedding is not monotonous white, but striped and big lattice, which makes it feel warm. The cushion of the ring chair is the cartoon Garfield cat head. The bright yellow color is a bit eye-catching, and it is a little incongruous with the surrounding. 3.5 points for guest room hardware. Humidifier, ironing bo…
1. The breakfast was very rich and the service was friendly. When I left early in the morning, the person on duty at the front desk handled the formalities very quickly
1. This is the 308 executive bed. I think it's very good overall, but the price is a little high. There is a five-star deluxe room next to it, which is only 398. It is estimated that the Little Swan has only one room above this size. I can see that the rooms used to be very poor. If you want to live here in the future, you'd better choose this executive bed!
1. It seems to be from the same company as Hongyadong Hotel, so the style of the room is quite similar, but it is smaller. Generally speaking, it is quite good. The food in the room is free, which is very practical. It's just that the breakfast is not flattering. The lobby environment is quite poor. Overall, it's good. It's a good three-star hotel.
1. The front desk floor attendants are all good, the room is quiet and tidy, the transportation is convenient, and there are a lot of food around. The only problem is that the toilet floor drain is poorly designed, which leads to a small amount of water
1. The overall feeling of this hotel is pretty good. It is very convenient in terms of price, travel, shopping, and booking air tickets (Air China is on its right). It's just that there is no computer in the room, and I don't know where the free Internet is. Supplementary comments: October 12, 2007: Yes, it's also very convenient to go to the airport. The airport bus is under it, and it runs ever…
1, "The price is on the high side, the service is average, the scenery outside the window is OK, and the breakfast is good"
1. The hotel is in the process of applying for a five-star hotel, but it seems that the four-star hotel is a little reluctant. The lobby is very impressive, but the details are very rough. The hardware needs to be strengthened. The service staff are polite and friendly. The hotel room and breakfast were very good.
1. In a quiet place, you can see a good view in front of the window. Hotel prices are really on the high side
1, "The price is on the high side. It seems that hotels in Lianyungang are expensive. Breakfast is not good. The room is not bad, and the scenery outside the window is OK. The most important thing is that the windows of the room are soundproof. The bed is small, but it is better to have a bed of Pearl Marriott."
1. Do you know where the network cable interface is? It is more hidden than the tunnel entrance of Gaojiazhuang. It's behind the bedside table! Don't you think so? It depends on how you use it. 1: Self provided network cable above 4m; 2: Bring your own small bench; 3: The trash can in the room can be turned over to sit
1. The hotel of Shenyang Municipal Government is quite spacious and convenient. Beiling Park is on the left, with a good environment.
1, "The government hotel feels very elegant and clean, and the whole hotel room layout is also very neat. I checked in in May. Because the first day the room could not access the Internet, I coordinated with the front desk to change another room that could access the Internet, and also helped to debug the laptop. The service was very considerate. There were people getting married during the two d…
1, "Overall, it was OK, but the front desk attendant was not dedicated enough. After checking in, he gave my guest's passport to someone else without even looking at whether it was him or not. Luckily, he was there. Otherwise, I didn't know what the consequences would be. Later, he didn't even say sorry or sorry!!! Hope to improve!!!"
I went to Dandong in late June and booked a two-day stay at Dandong International Hotel on Ctrip. On the evening of the 24th, he arrived in Dandong and took a taxi to the hotel. Dandong is not a big city. Drivers know about international hotels. The hotel is located in an inconspicuous street, with ordinary surroundings. Asked at the front desk, the receptionist said that he had not received the …
1. This time I went to Beijing to do business at Beijing Normal University, so I paid special attention to the nearby hotels. After staying for two days, first of all, the hotel is easy to find. It is very close to West Fourth Street. You can walk for two minutes at the Huguo Temple bus stop. Because it is close to the bus stop, it is convenient to take the bus anywhere, which saves money and tim…
1, "The equipment in the room is too broken, even the shower head is hard to use, and the air conditioner can hardly feel it. Although I opened the car the most, the other thing is that the equipment maintenance is not timely, the bath supplies are cheap, the shampoo with strange taste, etc.... I think the service is OK overall, and the equipment hostel is standard..."
1. Overall, I felt that it was good. The only drawback was that the sound insulation effect between rooms was not very good, and the house price was a little high.
1, "Although the facilities are a little old, the good service gives people warmth. The location and environment of the hotel are excellent. For older individual tourists, staying in the hotel is a better choice."
1. The room is clean, the bathroom is too small, and it's hard to turn around. Half of the location, because it is in the Hutong, it is not easy to find. The service was average.
1. Very satisfied overall, but there is one thing that needs to be improved. I checked in on the ninth floor. When I went to the front desk on the first floor to check out the room, the waiter on the ninth floor checked the room and found that I had lost a few items in my room. I asked them to deliver them, but the answer was to go to the room service department on the fourth floor. When I arrive…
1. The environment is good, the indoor color is very warm, and MM is very satisfied! It's just that the windows are too sloppy. I feel very messy when I open the curtains. The most insufficient place is to take a shower. First, the place is too small. Second, the water is always small and big when taking a bath. It stops for a few seconds!!
I lived 1 to 4 years ago. The price of hotel facilities is not bad, especially during the golden week. The sea front position is very good. High rise, most rooms can see the sea. The receptionist's attitude was very stiff, and none of the registered names were correct. Forget it. If it doesn't affect living, it won't matter.
1. The dinner in the western restaurant was good. The buffet of 68 was so good that I went out with my stomach in my hands. One word, great! Breakfast is far from enough! How dare you call yourself 68? One word, sweat! Hotel feedback August 14, 2008: Dear guests: Hello! Thank you for staying in Jinling Liyang Hotel! And leave us valuable comments! For breakfast, we will make timely adjustments. W…
1. The breakfast is very good. It is near the city center and convenient for shopping, but the rooms in Building 5 are equivalent to the 3-star standard. However, relative to the house price, it is also worth adding comments on August 11, 2008: In addition, the slippers provided in the room are too small to wear. Is it designed for women? I'm a size 42 foot. Hotel feedback August 14, 2008: Dear g…
1. The room is small but clean, which is very affordable. Disadvantages: there is only one set of bath supplies for double rooms. The hotel feedback: August 5, 2008: Dear guests: Hello! Thank you for choosing to stay in Jinling Liyang Hotel! For the problem that there is only one set of toiletries in the double room of the hotel, we have convened the relevant departments of the hotel to study and…
1,3 The living room is relatively large, but the heating is not too warm, sometimes cold and sometimes hot. There will be oil stains on the sheets, but it is acceptable. Washrooms and toilets will be cold at the beginning of a bath without heating. 24-hour hot water, relatively considerate service and bucket drinking water are not bad. The surrounding environment can also be quiet, from the west …
1. The hotel is suitable for those who go to Liyang for business or tourism. The buffet breakfast is very rich, and the hotel's internal environment and service are very good. The only disadvantage is that the hotel gate is too messy at night, with all kinds of vehicles and people crowded together at the gate. Additional comments on May 9, 2008: The water pressure of the shower in the room was un…
1. We stayed in the No.8 Five Star Building, which was fairly good on the whole, and the service was still lacking. It took too long to check out. The hotel reported that on May 6, 2008: Thank you very much for staying in the Liyang Hotel in Jinling, and shared your feelings about staying with us through the website. Our hotel has always been committed to continuously improving the software and h…
1. I reserved a big bed room, but the so-called big bed is only 1.5 meters wide, so the room is very large. The buffet is worth recommending. The hotel guest is 50 yuan/person, which is not bad. However, the waiter seldom sees a smile and ignores the greeting of the guests, which is bad.
1. It seems that JJ's order is not very good. It seems that water is not very good. Additional comments. March 29, 2008: How can I still show 4 points when I scored 3 points
1, "The location is good. It's very convenient to eat around the city center. The room is as clean as ever"
1. The room was OK, there was a food street downstairs, and the service attitude was very good! However, the network is not very good and is always disconnected; Breakfast was average.
1. Good hotel, clean and quiet (15th floor). The customer invited guests to eat in the private room of the hotel, which was very delicious. The Chinese breakfast is not enough, there is nothing to choose from, and the taste is fairly good.
1. The facilities of the hotel are a little old. It is an annex to a four-star hotel. But the service was good, and the price of the hotel was very attractive. I will check in next time! Supplementary comments: February 22, 2008: I live at 150. Not bad, no musty smell in winter!
1, "I live in a 350 big bed room. The furniture is too old, the room is too small, and the breakfast varieties are single. In general, it's OK. The location is good, and the service is also good."
1. If you want to stay, you'd better live in a room facing the courtyard, because there are some central air-conditioning equipment behind the hotel, which affects the rest if it rings at night. Breakfast was very ordinary, there was nothing delicious. There is a path beside the hotel, where there are several affordable restaurants, such as private dishes. In general, international hotels are the…
1. The service is very friendly and the transportation is very convenient. I will choose this hotel next time I go to Beijing!
1. When I checked in, the POS machine at the front desk was broken, so I had to pay cash in advance, which was inconvenient. However, the restaurant on the first floor is really good and cheap. It's worth visiting.
1. The room is very clean, and the toilet is well decorated. The breakfast was very rich and the bean curd was delicious! The transportation is very convenient. The sound insulation is not good enough. Our neighbor turned on the TV loudly at 1 o'clock at night. After the complaint, the hotel service staff went to negotiate with the neighbor next door to resolve it.
1, "The hardware is very good, the service quality is also very good, especially the surrounding environment of the hotel is very elegant. The breakfast is also good, and I will check in next time"
1, "Although the surface looks ordinary, the interior decoration is very delicate, clean and comfortable to live in; Yixing Hotel is the first choice to go to Yixing in the future!"
1. The environment and facilities of the whole hotel are very good, but the waiter was asked to get a map, but he never brought it. The price seems to be a little higher than before. However, the cost performance is satisfactory.
1. The buffet breakfast was very good and the service was very considerate. I will stay next time.
1. The girl at the front desk is very interesting. She often stays here and is familiar with everything. Hehe
1. It is equivalent to five-star service and better than four-star breakfast. About three-star room price is to borrow something for additional comments. On May 12, 2008, there was an Indian, very stylish and enthusiastic service
1. Every aspect was very good, and the cost performance was also quite high. It's just that some facilities in the room need to be delivered by phone, such as hair dryers, maps, etc. I live in Zone B, which seems to be of a lower grade, but it's OK, except that my room just has half a wall blocking the view, but my colleague lives in a beautiful place facing the lake. The fitness area is being re…
1. The price performance ratio of this hotel is relatively high. The room is large and the interior layout is warm. There are too few kinds of breakfast, and the waiter's attitude is quite good.
1, "I checked in with my family on October 20. The five-day tour in Beijing, including doorman, reception at the counter, restaurant service, and hygiene, was warm, warm, and polite. It made people feel at home. Check in and check out were very timely, and the speed was very fast. It was easy to get to the scenic spots in Beijing. The surrounding scenic spots walked 10 minutes to Youmei."
1. Home like, consistent style and room are the same. However, the price of Home like is quite realistic. If you stay in Shanghai, you can stay clean and enjoy favorable prices...
1. It is very close to the airport. The bed in the room is very big, and there is a mirror inside
1. It's OK. I'm not disappointed. It's about 500M away from Metro Line 2, but it's convenient to drive around Central.
1, "I booked a day on Ctrip, but actually stayed for two days. The hotel charged an extra room fee for one day according to the price of Ctrip, and upgraded my business room for free. I asked the front desk of the hotel to borrow a nail clipper, but they said no, and suggested that such small items should still be provided for the convenience of guests. After a buffet breakfast, the variety was O…
1. Very good hotel. Although there is a certain distance from the subway station, it is very convenient. The bed in the room is very big and comfortable. But relatively, other spaces have shrunk... But I still like that bed... The waiter's voice is a little loud in the morning. I hope it can be improved
1. Amazing! Although the window is facing Central, I don't feel noisy at all. The room was very clean and tidy, giving a very comfortable feeling. The service was also very good, the price was not expensive, very satisfied!
1. On July 25, I went to Taishan to play with my family and booked a room in the Overseas Chinese Building through Ctrip (for activities, I spent 280 to upgrade to 360 rooms, but actually we don't know what the 280 and 360 rooms are like). The evaluation of the Overseas Chinese Building is the same as that of many netizens before: the service is very friendly, but the facilities are too old (I re…
1. The lobby is good. It looks like a four-star hotel. The facilities in the room are average. I feel that they are a little old. The bathroom details are good. All kinds of supporting facilities are good. I feel that they are OK. I still need to stay in Taishan when I have the opportunity to go there again.
1, "The decoration is old, especially the material and color of the carpet are dirty, which is not commensurate with the four-star rating. The doorman is very enthusiastic, and likes one"
1. I have stayed in this hotel for many times. Last time, when I came to the front desk, the waiter could give me my name accurately. I felt very friendly. Four stars are different. And the waiter also arranged a business single room for me that day. The room was very new, which was better than the price I ordered. It is said that the hotel is engaged in activities. Business guests like us have t…
1. It's a very good hotel. It's close to the mountain and near the river. There are a lot of forests in it. It's good to take a walk. It's also a good choice to sit by the lake and have a rest; The room was very quiet, the facilities in the room were very good, and the waiters' attitude was also very good.
1. I don't know what happened. I always wanted to comment on Tai'an Overseas Chinese Building, but I never succeeded. Because the hotel service is very good. A while ago, I went to Tai'an to climb Mount Tai with my colleagues. I started at 12 o'clock in the evening. The waiter at the front desk told us that the temperature on the mountain was low, so let's add more clothes. Very careful. Because …
1. I checked in to the Overseas Chinese Building on January 6. When I arrived, I suffered a little cold. When I checked in, I kept sneezing. The front desk attendant immediately asked me if I had a cold? What touched me most was that when I entered the room, the room attendant sent me a bowl of hot brown sugar ginger juice. This humanized service really made me feel warm. It is indeed the only fo…
1. Good hotel! The room is large and comfortable! Because it's very quiet on the 21st floor! The dishes in the restaurant on the first floor are cheap and good in quality, but there are few varieties! It's a good hotel in Tongxiang!
1. It is a good choice in Tongxiang, with a large lobby. It's convenient to take a taxi.
1. The cost performance ratio is high, and the hardware facilities are better than before. satisfied!
1. I live in a deluxe big bed room with good hardware. Unfortunately, there are tiny hairs on the sheets, but the service desk changed them immediately after learning about it. The buffet was very good. This is the best hotel in Tongxiang.
1, "It's a very cost-effective shop~and one that I'm most satisfied with at present. It's convenient at the entrance. The fruit shop is 5 minutes' walk from Jiuguang Department Store and 5 minutes' walk from Jing'an Temple of Line 2. The hotel's service is up to standard! Praise~It's convenient to order food in the room, with sufficient taste, quantity and price. I will always choose here later. …
1. "The commercial standard room is relatively large, but the bathroom is very small. The sound insulation effect is not very good. Generally speaking, it is clean and tidy. The transportation is very convenient, and it is very close to Jing'an Temple."
1. The room is too small. In addition, the room I booked with the Greenhouse membership card is better than the one booked by Ctrip. It's the last room on the fifth floor. It seems to be the 522 room. The room is very large, and the bed is also very large. It's much larger than the 1.8 meter room. I hope Ctrip can provide such a room in the future
1. Location: quiet in the midst of noise, convenient transportation. There is a small supermarket in front of the door. The food in the restaurant is also good. It is 5 minutes' walk from Jiuguang, 20 minutes' walk from Henglong Square, Meilong Town, CITIC Pacific, Nanjing West Road shopping mall, parallel to Huaihai Road, and great shopping on the street! Room: I live in a deluxe double room. Th…
1. The standard room was reserved, but it was upgraded to an administrative room for free, which was good. The hotel environment is good, and the service is also very good. However, the parking lot at the entrance of the hotel should be charged, which is very bad. The first time I met this situation, I hope that the next time I go, the guests in the hotel will be free, not because of 20 yuan, but…
1. It's very quiet. The surroundings are good. The traffic is convenient. But there are not many entertainment facilities or eating places around.
1, "The room is a little old. In addition, the room I stayed in didn't come out after I went in. The front desk and the waiter didn't work well together. A supplementary comment was made on December 9, 2007: the service in this hotel is much worse than before, the facilities are also old, and I won't stay in the future."
1, "The location of this hotel and the cost performance of the rooms are both good. But I don't know whether the service has naturally declined due to the large number of guests. Ctrip's guests seem to be not very popular here. Every time you check in, if you don't have the big bed room, if you don't have the room, or if you haven't cleaned it up yet, you can't count the membership card points. T…
1, "Ctrip was good this time. The administrative room I booked was upgraded to the mountain view room in Building 8 for free. For the hotel, we can sum up: a five-star environment, four-star rooms, three-star facilities and services. The hotel is built along the mountain, and there is a special walking route map in the hotel. We should walk the entire hotel's mountain view at least for an hour. D…
1. Travel in Hohhot and stay in Jinhui Hotel. The hotel's rooms, facilities and other related conditions are good in the room price of about 300 yuan. The service attitude was very good. It is estimated that there are no disorderly people or harassing phones in the hotel due to the subordinate of ICBC. The most satisfied thing is that the location of the hotel is excellent, with catering, shoppin…
1,1. The hotel promised to pick up the plane. The plane was supposed to arrive at 10:00 p.m., but it didn't come out until 10:30 because of the baggage collection later. The hotel waiter had already raised a sign at the exit and waited. Although I was alone, I was still very enthusiastic and took me back to the hotel with a good attitude. Thank you very much! (The hotel is in the center of the ci…
1. I have lived twice. Quite satisfied, especially the airport pickup service. One person also picked up the plane, timely and considerate. Broadband speed is also fast. But there is no free fruit platter.
1. The hotel is very close to the railway station and can be reached within 10 minutes' walk... The service was good, there was a fruit basket, but some fruit was a bit rotten... I think that since we need to send them, we should send them better, or we should not send them at all... The hotel was very good overall, and the rooms were also very good..
1. It's a good choice with low price and good quality. It's very suitable to stay at night. The service is very friendly. The room is very cool without carpet, and the sea view is very beautiful
1, "Everything else is OK. Although it is not up to the standard of 5 stars, it is still clean and spacious. The most unbearable buffet seafood dinner in the resort is surrounded by flies, and the food is full of flies. It costs a lot of money and makes people angry... The beach in the aisle is beautiful and quiet."
1. The hotel staff had a very good attitude. They also sent two small dolls to the room in the evening. However, the buffet breakfast at the wine shop was not complimentary. Because the restaurant is open, there is no air conditioner (Sheraton is the same, but there are also closed restaurants with air conditioners, guests can choose). Although the sea breeze is blowing, there is still some sweat…
1, "We stayed in Asia Pacific (Phase II) for four nights from June 21 to June 25. We originally wanted to stay in this hotel for two days, and then stay in Yalong Bay for two days. But my husband felt too tired, so he didn't book another hotel. Now I feel a little sorry. First of all, the service of the Asia Pacific International Conference Center is really good. The waiters we see every day can …
1. "I stayed in a luxury seascape room in the resort. The front desk gave me the fifth floor (the highest sixth floor), and then almost 100% of the seascape. Although it was listed as a five-star hotel, I thought it was a four-star hotel. It was quite different from the five-star Sheraton hotel I stayed in later, but it was still in line with the price of his family on the whole."
1, "The facilities and environment of the hotel are good, but there is no market or supermarket around. You can see the endless sea from the balcony of the room, and you are really in a good mood. The only thing is that the breakfast is the same every day. It is not too far from the airport and the city. (It can be done within 30 yuan.)"
1. The hotel is excellent and the environment is first-class,.. It's beautiful,.. Air, greening,. visitors flowrate.. hot spring.. You can go again if you have a chance... Ctrip also tried its best to arrange many things..
1. Based on the experience of netizens, we booked a high-rise sea view big bed room in the resort and checked in on June 21-23. I'm glad that the service in Asia Pacific is pretty good. We arranged the room according to our requirements. The waiter will greet the guests in the corridor; We had barbecue in the hotel in the evening, and the service was also good. In general, the hotel environment a…
1. The basic facilities of the hotel are average, but the service attitude is really good. The rooms below the 8th floor are newly decorated. The rooms on the 8th floor are relatively old. There is a separate bathroom for bathing. The water is strong and the air conditioning is strong. The hotel seems to belong to the South China Sea Fleet of the Navy. The location is also very good. It is close …
1. The location is fairly good. There are some big stalls near the West Lake, and the food is convenient. The hotel service is very good, the waiter and the front desk staff are very friendly, the room is large and clean, and the price is cost-effective. If you go to the West Lake next time, you will stay.
1. This time, because we booked and registered with Hong Kong and Macao ID cards, the floors we arranged were much higher. Hehe. It's a big difference. The rooms are very new and seem to have been renovated. The bellboy has a good attitude. The afternoon tea style is rich. We also gave a 50 yuan voucher for checking in, so the room price is very cost-effective. If we come back in the afternoon, w…
1. Unexpectedly, breakfast coupon and a 50 yuan meal coupon were given at the time of check-in. After using the buffet breakfast, I used an administrative set meal in the revolving restaurant at noon, and there was still 3 yuan left, but unfortunately it was not refunded to me. Not bad. The hotel includes two meals. Socialism.
1. The administrative room I live in is brand new, with five-star standard * v *. It's a pity that the Chinese restaurant on the top of the building is closed for decoration. I really like this restaurant. It's authentic Cantonese food. I hope it will resume business next time. It seems that the hotel has spent a lot of energy on renovation.
1. I haven't been here for more than a year, so I came to live again. I felt it was good. The old bottles were filled with new wine. The facilities in the standard room were basically replaced. Smiles were everywhere. It seems that this is really the buyer's market. I like the feeling that employees "ingratiate" with customers. Give him full marks.
1. There is no administrative room this time. I want to see the difference between an ordinary big bed and an administrative room. I found the room was pretty good. The bed is big. The service attitude was pretty good, the doorgirl was replaced at the door, and the smile was pretty good. The front desk reception and concierge service were also very good.
1. Overall, I felt it was pretty good. The location is very central. It's very convenient to go to the business district. Last time I arrived late, I also provided a room upgrade. It's just that there are some problems with the coordination of the guest rooms. There is still luggage in the upgraded room, which shows that there is a problem with internal communication. If the time is still good, b…
1. The biggest advantage of a standard business hotel is its good location. The room is quite clean, the facilities are OK, but some details need to be improved. The floor attendant was very good (the last time I stayed on the sixth floor, I would like to praise the attendant here). I cleaned the room and cleaned it in a timely and careful manner. I forgot something when I left. I chased me for a…
1. The environment is very good,.. The price of Ctrip in the off-season is also quite attractive, and I encountered some problems in the process,.. However, Ctrip still has a little influence,.. Under repeated supervision, the problem was solved satisfactorily... It's really good to praise the five-star hotel. The hot spring is worth a visit. In the forest,.. Facing Cuihu Lake,.. The rain drizzle…
1. "It is definitely a super value hotel. If it is not for luxury enjoyment, every part of this hotel can be absolutely satisfactory. (AvlNtTy)"
1. "His brother just came back from Dongguan to book a hotel for his colleague. He asked him in detail about his impression of the Yuehai Hotel and said that it was hardware and software: excellent! So give me a compliment."
1. The hotel has a good sense of service, is very friendly, and takes the initiative to introduce the characteristics of the hotel. I feel good.
1. The hotel rooms are built around the pond. The goldfish in the pond add a bit of interest. The main guest room can be separated from the restaurant by the pond. It is quiet and elegant. The front and rear parking lots are very convenient for picking up and seeing off passengers. Disadvantages: some electrical appliances in the special room are old.
1. The environment is really good. We have everything we can eat, drink and play. We can enjoy it without leaving the house, but the surrounding environment is too bad. Except for the hotel, there is nothing to look forward to. It is possible that most of the Japanese still have Japanese shares. There are many Japanese rooms, and one floor is made of Japanese rooms (no room, it is TATAMI style). …
1. The environment of the hotel itself is good. The terrace, courtyard and pavilion are very quiet. It feels like living in a garden. And the swimming pool is free, which surprised us, but we didn't bring our swimsuit. The room was average, there was no special feeling about it, the service was pretty good, the waiter helped me get the luggage to the room (no tip: -)), the company arranged a busi…
1. "I have stayed many times. I feel it is good. The broadband speed is fast, the service attitude is OK, and the price is reasonable. The main problem is that the environment around the hotel is not good. There are too many Japanese."
1, "Fang Bi, but not the service. It is worth mentioning that western food is the most important food. People can rank first in the city!"
1, "The courtyard environment is very good, the room is also OK, the facilities are a little old, and the service provided by a lady at the front desk is a little poor, but overall it is OK."
1. The hotel is not bad, the price is affordable, and the service is up to standard, so I recommend it!
1. The environment in the hotel is good. I have to walk around in the morning and then go to have breakfast. There are also a lot of people checking in. The parking lot is full, and the service is OK. Generally speaking, it is good. But I didn't book the hotel through Ctrip, and I can enjoy the additional benefits provided by the hotel when I checked in. I asked the front desk lady. They said tha…
1. The garden hotel is a little old in the city, but the room near the garden is good!
1. The service attitude was really good, making people feel comfortable. When I checked out, I was told that I had left a piece of clothes in my room. I wanted to go back and get them, but they insisted on asking the waiter to fetch them for me. People in and out of the hotel will smile at you, bow down and nod to greet you. I really like the surrounding environment. It feels like a small town. T…
1. The service was very good, the surroundings were very busy, and it was very convenient to take a taxi and eat. The 330/night room is relatively small, but it is clean and tidy. Although it is a four-star room, the overall feeling is still very good. There are many beautiful fish in Huaqing Pool. You can buy fish food at the front desk.
1, "I checked in on March 19, two nights in total. I just came up to make a comment, hehe. 1. I ordered a double bed room. Although it is a hotel with more years, the cleanliness and environment are pretty good! 2. The service personnel are quite friendly, because their own chargers can't be used in the hotel. So I asked the front desk to send a travel charger to me in the middle of the night. Bu…
1. If I go to Dongguan on business alone, I will stay in Dongguan Hotel, but if I come to Dongguan with my boss, I may live in Sofitel. I like the environment of Dongguan Hotel and its several restaurants. It is quiet and comfortable in downtown, and the hotel service is up to standard. For ordinary business travelers, the standard rooms in Dongguan hotels are the most cost-effective.
1. I have just checked in and like the mountain view room. In particular, the walking route map provided by the hotel is very popular. Since the hotel is located in Building 5, which is a little far from the hot spring, it is just in time for the light rain. It is recommended to provide a courtesy car. Hotel feedback April 14, 2008: Dear guests! Our hotel has a shuttle bus to the Hot Spring Club …
1. The overall feeling of the room is OK except that the decoration is not fashionable enough. I live in a big bed room. It would be better if the bathroom in the room could be made of glass. The location of the hotel is excellent. We take a bus from Guangzhou to Chang'an. After getting off the bus, we cross the road to Chang'an Hotel, which is very convenient. There are restaurants and Baijia su…
1, "The rooms in the auxiliary building are a little old, so it's really necessary to renovate them, especially the carpet, otherwise it's good on the whole. The breakfast service is still OK, still up to standard."
1. Thank you very much for the hotel Ctrip arranged for us. We are satisfied with the service of the hotel. We hope that Ctrip's service will become better and better, and provide more excellent and comprehensive services for Ctrip's guests.
1. I booked a room with Ctrip for the first time. It was very comfortable to stay in Chang'an Hotel, and the catering was very satisfactory. The price is only a little lower than the front desk price, not too competitive.
1. Because of the convenience of work, I often go to this hotel. Transportation is a big consideration. Neither the shuttle bus nor the permanent bus runs to a hotel, which is less convenient. The day before yesterday, when I checked in, the front desk noticed that it was my birthday and arranged to give me a cake. I was very pleased.
1. The location of the hotel is good. The transportation is very convenient. The overall feeling of the room is OK, but the bathroom is a little small. The breakfast provided by the hotel is not rich enough. The overall service awareness of the hotel staff was very good, especially the lobby manager, who gave us a local map when arranging the car booking. It was very considerate.
1. It's not worth the price. Breakfast is too bad. Maybe I went late. There was nothing to eat around 9:00
1. "A very good resort hotel, with first-class environment, especially the outdoor natural environment, and good room facilities. The only problem is that the restaurant price in the hotel is a little higher, which is almost the same as the price in the Hong Kong 4-star hotel. The hot spring is average, which is worse than the Yishang in Tangshan, Nanjing."
1. I checked in for the third time and thought it was pretty good. It happened to be hit by an earthquake and the low floor was not obvious. I hope Sichuan will recover from the disaster as soon as possible!
1. Although I ordered a standard room this time, when I arrived, I changed to a newly decorated business single room, which still smells a little bit of decoration. It is estimated that it will not be available in a few days. Although the room is not very big, I think it is good overall, clean and tidy. There is less room for hanging clothes in the room. I have already raised my opinion with the …
1. The hotel is in a good location. It takes about 25 minutes to walk and 5 minutes to take a taxi from Tianfu Square and Chunxi Road. The room and service were also good, up to three-star level. It's just that breakfast is too simple. The room carpet and wallpaper are a little old.
1. The administrative double bed room booked through Ctrip (and the room charge was paid in advance)~Finally, we were given a big bed room for both father and daughter~I have repeatedly stated that there is no double bed room~At my repeated request~Finally, although we still provided a double bed room~but the impression was greatly reduced~Additional comments on March 24, 2008: Hot Spring~98 gues…
1. For the first time, I stayed overnight in Lanzhou City and booked the Friendship Hotel on Ctrip by phone. This is a reception hotel of the former municipal party committee. The building should have a history. I stayed in the guest building, and the facilities in the standard room were fairly good, clean and tidy. The main disadvantage of the room is that the TV is relatively old, the TV statio…
1. The environment is good. I checked in on August 18 and installed the elevator on August 16. The reservation staff did not understand this information. The hotel is the best one to travel in recent months, and the price is on the high side.
1, "In June and July, we checked in two luxurious big bed rooms. The room was relatively large, the facilities were a little old, and the environment was good. Facing the Helong Sports Center and the Ferris wheel directly, the breakfast was very ordinary, and the waiter was particularly depressed. He even cleaned up when we were about to finish eating. It didn't take so little time. It was obviou…
1. I checked into the administrative floor (28th floor) on the 9th. The facilities and service were OK, but the elevator was too old.
1. Broadband Internet access is very fast. The barbecue on the first floor of the hotel is good. The overall cost performance of the hotel is good. A taxi in the bar street costs 10 yuan
1. The overall feeling is pretty good. It's also convenient to go to the shopping street. Breakfast is rich in general, but the service ecology of frying eggs needs to be improved. He should not be asked to fry an egg.
1. It's a very good hotel. The waiters are warm. The hotel facilities are very new. It's comfortable to live in, and it's worthy of a four-star hotel. What is particularly worth recommending is that the catering is very good. No matter whether it is a house meal or a delivery, it tastes good and the price is not expensive. He will stay at his home when he goes to Xi'an. Supplementary comments: Au…
1, "It's worth the money. This time we booked three rooms. The service in the central and western regions is sometimes much better than that in developed regions. The hotel feedback: August 8, 2008: Thank you for your stay, and look forward to your coming again."
1. The luxury room in Building 5 in March has a really good environment. From the indoor display to the view outside the window, and the garden in the hotel, it looks luxurious and quiet. The buffet in the morning of the hotel is also very delicious, both Chinese and Western styles are available, and there are a lot of choices. The only thing lacking is that, as the first day of staying in the ho…
1. This is a very good hotel. Although it is not in the center of the city, it is not far from the Bell Tower and Drum Tower. Taxis can start at the starting price, or you can take bus 606, and the station is opposite the hotel. The hotel environment is very good, the rooms are very clean, and the staff service is also quite good.
1. The price is good. I will stay here next time on business. The room was pretty good.
1. Good location, rich breakfast and fast internet access. It's just that it's no longer managed by Marriott. I hope the service level will not decline
1. 1. The location and environment are good. 2. Breakfast is also good. 3. The service is good, especially the indoor swimming pool facilities. 4. The room is old, especially the slippers are too thin, not like a four-star hotel
1. The executive deluxe room is a little expensive, and the room area is small! The service was fairly good overall, but the room cleaners were not very polite. Sometimes they just knocked on the door and came in without permission! Good location!
1. It is located in the center of Shanghai, so it is relatively arrogant. However, in the surrounding hotels, the cost performance ratio is high, and it is difficult to book a big bed room.
1. Generally speaking, it's pretty good. The transportation service is OK. The hotel is a little old. It doesn't look like a four-star hotel. The lobby is very old. Hehe, the cost performance is reasonable.
1. The environment is quite good. As a four-star hotel upgraded locally in Liuzhou, it is quite good! And the attitude of the waiters is also very good. It's free to make domestic long-distance calls in the room, which is only available in Liuzhou! More distinctive!
1. The location is very good. In the center of the city, the rooms can see the peninsula and the river. The catering (revolving restaurant) is very good. Hotel feedback: August 7, 2008: Thank you very much for your support and love for our hotel. Liuzhou Hotel is committed to building the highest cost performance hotel in Liuzhou. Our hotel's 24-26F high-rise viewing room, which is decorated acco…
1, "It's the second time I've stayed in this hotel, and I feel that the view of the room facing Liujiang is quite good for the first time. However, the road in front of the hotel has been repaired, and the transportation is very convenient. The waiters of the hotel are still smiling as usual, especially the revolving restaurant on the 30th floor. When night falls, I come here to eat and see the b…
1. It's a good hotel. If there's a problem, the waiter knocked at the door when I didn't open the "Do Not Disturb" twice. They opened the door before I got to the door. Hehe, please pay attention to those who stay in the future, especially those who are doing sensitive things!! Supplementary comments: On July 2, 2008, when I booked a room online, I added that "15F or 16F is the best way to see th…
1. Support as always. It would be better if the service of a good hotel could be improved a little. Hotel feedback: July 31, 2008: Thank you for your long-term concern and support for our hotel. Our hotel is about to apply for a four-star hotel. We have also strengthened and improved our software services while upgrading our hardware, so as to make every guest satisfied. Our hotel's 24-26F high-r…
1. The location of the hotel is very good. Across the street is the bustling Nanjing Road, which is also very close to the subway station. The hardware of the hotel is good in the 4-star level, and the service is also very good. It may have been open for a long time. The room is a little old, and the price of nearly 1000 a night is not free of charge, and it is not very user-friendly. Maybe it is…
1. It's a good choice to go to Liuzhou. There is a lot of activity around, bookstores, pedestrian streets Very good service, the room was OK too. The bathroom is too small, and breakfast is too ordinary. Anyway, it's OK to go to Liuzhou. Feedback from the hotel: July 31, 2008: Your comments have been fed back to the western restaurant, and the varieties of buffet breakfast have been adjusted, whi…
1. It's a good choice to go to Liuzhou for business, especially the business room. The room facing north has a good night view. Hotel feedback: July 31, 2008: Thank you very much for your long-term strong support and concern for our hotel. Our Jiangjing room facing south is also very good. In addition, our hotel's 24-26F high-rise viewing room, which is decorated according to the five-star standa…
1, "It is also one of the best cost-effective hotels in Liuzhou. The scale and quality of the hotel are reasonable, and the location is also good. It is basically close to the four-star level. The hotel feedback on July 31, 2008: Thank you very much for your support and love for our hotel. Liuzhou Hotel is committed to building the highest cost-effective hotel in Liuzhou. The 24-26 high-rise view…
1, "The best hotel I stayed in in Shanghai for a few days is a four-star hotel. Overall, I feel it is of the best quality. The reservation desk gives 2715 rooms around the corner, which is very comfortable. My son enjoyed himself very much. However, the service staff of the hotel is indifferent, and there is still a difference between internal and external guests. Similarly, when I stopped a taxi…
1, "Compared with the hotel at this price, it is still very good. The room is not big but very clean, and the facilities in the washroom are also made in good faith. The faucet is very big, and it is comfortable to wash. There are not many kinds of breakfast, but it is still a buffet. The kitchen is connected to the restaurant, and the food prepared by the waiter is taken out. It looks very warm,…
1. The attitude of the waiter was very good. If there was a meal reservation service, it would be even better!
1. The room area is too large, resulting in poor cooling and heating effect of small power air conditioners. In addition, the bed is far away from the TV, which is relatively difficult to watch.
1. The room environment is good, and the courtesy service at the front desk is also up to standard!
1. The room is clean and comfortable! There are few business hotels in Songjiang! This hotel is OK!
1. The business big bed room is a little small, but the economy hotel is also like this; The environment is average, and I feel very chaotic around. However, there is a Lotus Supermarket nearby, which is very convenient for shopping; The service is better than the other two economy hotels
1. My friend was quite satisfied with the hotel's evaluation, but the traffic was very heavy. It takes a long time to get in and out.
1, "Good value for money, at the same price, the three-star hotel is good..."
1. Advantages: 1) It is convenient to travel in the same yard as the bus station
1. The first time I booked a hotel online, the price was 428 yuan. I felt that the room was relatively poor. In the past, when I came to Urumqi, I always booked a room in the name of a friend's company. The price was very favorable. This time, I ordered it myself. Now it is off season. My 428 yuan room is only 320 yuan for a friend's reservation
1, "I checked in on July 10. Because the hotel was engaged in activities, the original room of more than 700 yuan was only 498 yuan. It was quite cost-effective. The location was good. The room was also good. However, if the original price was more than 700 yuan, it would be a little expensive. I was satisfied overall."
1. I started to read the comments of several friends in 2005, but I didn't dare to check in. Unexpectedly, it has changed a lot. Although the room is small, it is very clean. Next time, I will choose this hotel. I just hope broadband will always be free!
1, "I ordered it for my colleague, and the following is his feedback: It is excellent and I can recommend to anyone else to stay here. My room was on the top floor, the 8th floor and very nice. Suggestalwaysask for the 8th floor, eventhoughIdidnotseetheotherfloors."
1, "In addition to the service attitude at the front desk, the room facilities are very good. Philips has LCD TV sets and computers for backup. However, the location of the room is very poor, probably because it was booked through Ctrip rather than directly."
1. Advantages: The room hardware is good, brand new and modern; Although the house itself is old, the old house is tall and spacious. Disadvantages: the price is actually small and expensive; The room is slightly crowded; Broadband charges 10 yuan and the network cable needs to be claimed; Breakfast is not included; It was OK to pick up the plane, but we didn't send it off, although we saw that t…
1. It's too common. The Internet is slow at the same level as the snail. It's too dizzy. Additional comments. April 2, 2008: No breakfast comments
1. I checked in on May 21 and left on May 22, and the company reimbursed me at the end of the month. The financial staff believed that the seal of the hotel invoice was vague and needed to be re issued. I was on a business trip, so I entrusted the company's finance department to send the unclear invoice to Mr. Ye of the Front Office Department on May 28. On June 11, the company's finance departme…
1. The surrounding area is not very prosperous. It is basically outside the city center. The transportation is very convenient and easy to find. I ordered an executive king size bed room. The room was average, but not big enough. The price was not low. There were few kinds of breakfast. The swimming pool was not small, but I didn't bring swim trunks. I didn't try it. The service level was fairly …
1. I only stayed once because I saw the customer's needs. I used to live in a five-star hotel and it was very new, so I felt it was not so good this time. Many aspects need to be improved
1. The transportation is convenient, the service is satisfactory, and the surrounding environment is also good
1, "The service attitude is good. Every service staff can actively say hello. There are many foreigners. This hotel may have rooms at different levels. Next time, we need to change rooms."
1. I am very glad to have such a hotel in this small western city. The free airport pickup service is convenient for me to travel. It is located in the center of the city and convenient for shopping. Breakfast was quite rich, the service staff were very friendly. I recommend you to try it. I think I will still stay here next time I come here. Additional comments: August 15, 2008: I would also lik…
1, "I feel very good. It's a good hotel. I plan to stay there when I go to work next month."
1. First of all, I am satisfied with the hotel pickup service, which is agreed with everyone. I come to Jiugang to do business. It is very convenient to stay here when I go to Jiugang to do business. Without a car, the attendant will help me book a car warmly and thoughtfully. What touched me was that I had to go to work the next day. The day before yesterday, I found that my clothes had a tear. …
1, "The transportation is convenient. It's a good choice to go to Nanjing Pedestrian Street. But the restaurant's business hours (especially the Chinese restaurant) are a little inconvenient. There is no lunch at 2:30 noon. You know, this restaurant's Chinese food is a little famous."
1. After seeing the comments of many netizens, I checked in this hotel with a feeling of trepidation. After checking in, I want to objectively straighten it out and let everyone share the good things:) Jiayuguan is a very small city, and this hotel is probably the best hotel in this city. I am most satisfied with the free airport pickup service of the hotel. After all, when I come to a relatively…
1. The reception staff of the hotel was very friendly, but the food in the restaurant was too bad. The service was very good. I knew we were going to Jiuquan early in the morning. The restaurant gave us a package before the meal was opened. Thank you very much! Mingming stayed there for two days and opened another room the next day. But it only reflects one room a day, and the staff of Ctrip have…
1. In coastal cities, this hotel may be a three-star to four-star hotel, but in small cities like Jiuquan, it is also very good. Of course, the price is not cheap. The hotel facilities are relatively new, the rooms are relatively large, and the staff are also very enthusiastic, but the water level needs to be further improved. In general, Jiuquan is the best
1. I ordered it for two colleagues. I was quite satisfied, but I felt that the price was on the high side. In such a small western city, it was reasonable to pay 300-350 yuan for breakfast in a hotel like this.
1. It is not easy to have such a hotel in Gansu, which is much better than Sunshine Building. The hardware facilities and service level are first-class. Suggestions: the swimming pool is too cold, and the room rate includes breakfast
1. I think it's average, but the cost performance is not very high! Checkout is slow, hope it can be improved
1. I stayed in a green suite. I don't know where the green is? The carpet is really dirty. The bed is hard and noisy. There is no air conditioner. You can't adjust the temperature! I don't know how many days the welcome fruit has been kept. I didn't dare to eat it. 660 One day is not worth it!
I checked in on October 19, 2007, and generally felt that it was good. The location was quiet in the middle of the noise. The "Qiaoxiangyuan" rice noodle was diagonally opposite from the hotel. The room facilities were OK, and the service was good. The Nanjiang bathing place at the door was good in quality and cheap. I could only say that I could go there for breakfast. But the bed is not very co…
1. The hotel is OK. There are computers and digital TVs in the room. Breakfast was average. The sound insulation effect is quite poor. There is a commercial street below, which is not very quiet.
1. Recently, I went to Fujian more often. I always stayed in Jianlian Hotel in Manhattan. I felt very good when I first stayed in the hotel. I stayed in a business room. Although the room was small, I had all kinds of things. Besides, the dolls on the bed made me feel at home. The service was also good,
1. Except that parking is not very convenient, everything else is pretty good, the service quality is also very high, and the downtown environment is also very attractive, not bad!
1. Pretty good. The things in the downstairs restaurant are not expensive at all. You can pay for the room,
1, "The location is good, the parking lot is large, the customer service is professional, the room is also very standard, and the broadband is smooth. Free registration website navigation hotel index service description About Ctrip's recruitment of talented agents for cooperative advertising business Contact us Copyright1999-2008, ctrip. com. allrightsreserved."
1, "The room is OK, the special suite is very good, but the restaurant is too dirty, and the breakfast is not appetizing."
1. The service was good, and the attitude of the staff was very friendly. The best thing is that the room is big enough.. The layout of the writing desk is very good. The transportation is also very convenient, and the surroundings are also very busy. It's very cheap to walk 10 minutes to the stalls on the top floor of Zhongmin Baihui to eat. It tastes good too. The only disadvantage is that brea…
1. The location of the hotel is very convenient. The room in the small suite is spacious and comfortable. It costs 40 yuan to stay in the hotel for overnight parking.
1. Just behind Chongsheng Temple, the hotel environment is good, but the hardware facilities are relatively old. The location is close to the scenic spot, but far from the urban area. I hope the hotel can provide more convenient transportation for guests, such as frequent shuttle buses.
1. The room is very clean. Open the window and you can see the Three Towers. Hey hey, even the tickets are saved. It's really convenient to drive five minutes to Canghai Golf. There was a fly in the ointment. When I went out, my friend left his cell phone on the bed (very sure and certainly). I remembered that I had left Dali for half an hour and called him. Unexpectedly, his cell phone was hung …
1. There is a one-way street at the entrance of the hotel, which is inconvenient to go out! Everything else was OK
1, "1. Book a standard room, and upgrade to a suite for free after arrival because there is no room. Appreciate one. 2. The room is quiet. 3. It is located in the west of Zhengzhou. If it is mainly in the east, you need to consider the traffic problem. Free registration website navigation hotel index service description About Ctrip's recruitment of talented agents to cooperate with advertising bu…
1. Very satisfied on the whole. It's a little far from the city center. The room is clean and tidy. The big bed room I live in is a little small. The service was very good. They washed my underwear for free and gave me fruits (2 bananas and 2 apples) every day. The waiter was very polite. The disadvantage is that breakfast is not rich, and the price of the restaurant on the first floor is too hig…
1. I went to live in the hotel just after it was renovated. After one year, it looks a little old and may not be well maintained. The service staff had a very good attitude, but the hardware was a little poor. It's not cheap in places like Zhengzhou. Breakfast is not rich enough.
1, "The waiters are very considerate. Ctrip and the hotel should cooperate very well. They can give you fruits and wash and iron two clothes for free, and the speed is very fast. It's just that the hotel's Internet speed needs to be improved. It's a pity that online games can't be played. The front desk service is very considerate. Praise me."
1. The waiters are very considerate. Ctrip should cooperate well with the hotel. They can give us fruits and wash and iron 2 pieces of clothes for free. They are also very fast. When we go there, someone has a meeting. It is estimated that they occupy a lot of rooms. There is no corresponding room. The hotel will upgrade us for free and we can enter the business room. However, the hotel is a litt…
1. The room was OK, and the service seemed to be trying to be good, but it was always poor. However, the room at this special price is not bad. Free washing powder is available. This is the first time I've seen it. It seems that the Housekeeping Department has worked hard. It is suggested that leaders should go out to see the same type of hotel facilities. The bathtub is very slow to enter the wa…
1, "It's OK, but I didn't give any fruit when I checked in for the first time. This time, I gave it away, but the next day I changed the fruit I saved the first day. Although the room service center helped me change two apples, one was bad, but it was OK on the whole. I heard that the price will rise soon, because I was rated as a four-star star, hey"
1, "Generally speaking, it is clean, and the location is very good. It is convenient to get in and out of downtown areas."
1, "I was quite satisfied with my stay in Shaolin Hotel this time. It's easy to find the location of the hotel. It takes only a few minutes to get a taxi from the passenger station for 5 yuan. The rooms are clean and spacious. The hot water for bathing is also very comfortable. The best place is that there is a very busy snack street outside the hotel. It opens around 6 o'clock in the evening. Th…
1. The room was very large, and they were all shocked. There is a supermarket and a snack night market on the opposite side, and a bakery next door, which is very convenient. Take the No. 1 bus (departure station) directly from the passenger terminal, and the name of the station is "Shaolin Hotel". It only costs 2 yuan to ride a trampoline. The facilities in the room are good, but there is also n…
1. The door of the hotel is very fashionable, the hall is very personalized, and the rooms also maintain the same style. The green wood grain and brick wall are simple and personalized, much like a fast hotel. It's worth it in terms of price.
1. The New Century Hotel is really good. It is the second time for me to stay in this hotel. The hotel room has been renovated into a new single room, and the interior is also equipped with a LCD computer and a fax machine. Next time, I don't need to bother to bring a computer. This time, it is just in time for the opening of the natatorium. The surfing in the indoor natatorium is very good. I su…
1. The overall feeling of the hotel is pretty good, but one of the better things is that they have a large indoor swimming pool. According to the staff, it is the best swimming pool in Yangzhou at present. There are rockeries, artificial waves and exciting slides in it. I suggest you try it when you check in the hotel. In addition, our rooms are also good. It is said that they are newly decorated…
1, "When I went to YZ this year, I chose to stay in the New Century Hotel~4-star hotel. I had a very good impression. It was close to Slender Lake, Geyuan and Heyuan. It was only about ten minutes' drive. There were banks, newspaper stores, restaurants, cake shops, tea restaurants and supermarkets nearby. It should be said that life was very convenient. It was a good choice for tourist accommodat…
1, "Very good! We booked a standard room and upgraded it to a luxury standard on the day of check-in. The room is clean and the service is warm. If the windows of the room can be opened (breathable), it will be even better!"
1. The decoration is simple and practical, but there are few power sockets. It is better to equip a connector. In addition, the hot tap of the bathtub should be attached with the diagram. The first time you come here, you must have a long time. The hotel lobby is too big. Breakfast has to go through hardships
1, "Recently, I drove to Yangzhou with some friends and stayed in the New Century after being introduced by my friends. The first impression is that the parking lot is very large, which can park about 300-400 cars at the same time. The room is very comfortable, and the sound insulation effect is also good. The hotel has recently been renovated, and the overall feeling is very good. The service of…
1. Very good hotel has checked in many times
1. In charge of airport pick-up and drop off, the hotel is generally good, suitable for ordinary guests. It is a kind of hotel that will not have any problems on the whole.
1. Very good hotel!! It's the second time to check in!! I used broadband this time! It's unimaginable how fast!! The room layout is also quite good!! The service was also good!! The manager of the second check in also called to do a questionnaire survey! ha-ha!! It is worthy of being 4-star! The price is also quite reasonable! The next time I come here, it will be this one
1. The most unbearable thing is that broadband is charged, 12 yuan per hour! Black... I stayed for just one night. I felt that everything else was pretty good.
1. The hotel service was very good. I originally ordered a standard room, but when I arrived, I asked to change it to a king size room. The hotel quickly changed it for me. All other aspects of the service were also of a high standard, with newspapers, fruits, coffee, tea and other free supplies every day. It is also close to the city center. Price? Because I didn't go anywhere else to ask about …
1. "Overall, it's OK. I won't mention many advantages. The disadvantages are listed as follows. I hope they can be improved: 1. There is an abnormal noise in the room at night, such as water drops or air currents
1. The price is moderate. I think it's fairly good overall. It is a little difficult to find it geographically (because it is not near the main road), but it is very close to Beijing Road, the commercial street. There is a small food street outside the hotel.
1. I have always stayed in this hotel when I came to Jiangmen for business, and I think the cost performance is fairly good
1. At present, 4-star hotels in Jiangmen have relatively high neutral prices. It's convenient to eat and shop around. The hotel facilities are quite old.
1. Every time I go to Jiangmen, I stay in this hotel. The transportation is convenient, and the room is a little old
1. The network of this hotel is not very stable and intermittent. I hope it can be improved.
1, "The location is good. It's not too far from the bus station. You can walk for 15 minutes and take a taxi for two minutes. The quality of the breakfast delivered at the time of booking is very poor, but there are McDonald's and Kentucky Fried Chicken nearby. The room is wide and clean, but the electrical plug is round, which is a bit inconvenient. The broadband plug is a distance from the tabl…
1. The hotel decoration is a little old, and the elevators are the most old-fashioned. But the room should have been redecorated. It is relatively large and clean. The location is excellent. It's very close to the bus terminal. It's also very convenient to have Xinyijia on the other side.
1. I seldom go to Yichang. I listened to colleagues' introduction. It's cost-effective. It's a good hotel in Yichang.
1. The room is very large and faces the Yangtze River directly. The scenery is very beautiful, but there seems to be less eating places nearby.
1, "The bed in a deluxe double room is very big. A single bed is already as big as the double bed I live in Hong Kong. Some details are also interesting. For example, a small envelope placed on the bed will have a candy and will tell you the weather tomorrow. The towels are a little old. There is no line to dry clothes in the bathroom. Additional comments: February 28, 2007: It is a little old an…
1. The standard big bed room with a jacuzzi and sauna is very special. The 400 free broadband holiday is also worth it. Next time, I will check in again and feel the free massage bathtub and sauna room:)
1. They said they would deliver the fruit tray, but when they arrived at the room, there was no fruit tray at all. They called and asked several times. At first, they said they would deliver the fruit immediately. Later, they said they would deliver the fruit tray the next day after work. Besides, the fruit was whole and not cut. But overall, it's worth it.
1, "The hotel is a little old but the room is clean. It is quiet to live in the north room of the high-rise. If you go to Datong next time, you will stay again."
1. The room is clean, with water purifier and bathrobe. The complimentary breakfast was passable. Good value for money. The only disadvantage is that the front desk takes a long time to check out!
1, "It's a good hotel. The location is very good. It's coming out of the railway station. The first floor is a little noisy. There are tour groups and guests coming for dinner, but it doesn't affect the accommodation."
1. The room was decorated well, and the breakfast was also very good. Easy access. recommend.
1, "The location of the hotel is very good. It is very close to the railway station. I always feel that the cost performance of the hotel is good. The room is not very large, but it is also a very good choice for business trips."
1. High cost performance. The service attitude was also OK. The room should be smaller. It is commendable that there is no harassing phone in the hotel near the railway station at night! It's commendable! Breakfast is relatively simple, generally speaking.
1. Due to the large scale of the hotel, there is no room for service staff on the floor, so we can't find any attendants; The room is cold (especially the first floor), so you must order more than two floors.
1. Living here on May Day, it's OK as three-star hardware. The front desk manager praised him. Our party ate in the next room and won the prize in the invoice. But the restaurant was not willing to help us exchange the invoice. The attitude was also very unreasonable. We told the hotel about this matter. Manager Zhang Ying at the front desk said she would help us deal with it and mail it back to …
1. "Hotel facilities and service quality are average, traffic conditions are relatively convenient, and it is more suitable for middle-income families to travel"
1. After booking with Ctrip and staying for 3 days, I felt that there was a big gap between the price and the room. The room was old and the bathroom was small, especially the TV set. It was estimated that there was no such TV set in Chengdu hostels. The breakfast was good, I didn't realize the service. The room price should be about 158 yuan/room.
1. It is very famous, but the facilities are not very good, especially the single big bed room. There is no quiet room. After checking in, we had to change to a double room.
1. Breakfast was OK, the room was average, but the sound insulation effect was very good. Although it was a big road, there was no mocking sound at all
1, "I heard that it is the best hotel in Liuzhou. It was originally the guest house of the municipal government. It is close to a river and has a good view. The transportation is also OK. The room did not leave a deep impression, but I think the waiters in the Chinese restaurant on the ground floor have a very good attitude, hardworking and friendly. They gave away hot towels several times for me…
1. It's a good hotel. It's the best in Liuzhou. The surrounding environment is also very good.
1. The breakfast was very poor. It was all vegetarian dishes. In addition, the concierge department also lost one of my baggage, and finally found it was taken away by someone else, and it took half a day to find it. Everything else was OK.
1. Good location, friendly waiters, good breakfast and fast elevator.
1. I stayed in a Jiangjing room. The room is very large, the environment is first-class, and the price is not high (258 yuan for 2 breakfast). The service is not up to scratch, which is generally good.
1. The location of the hotel is very good. You can walk out to the Songhua River. If you live in a room near the river, you can get up early and open the window to see the rime. The transportation is also quite convenient. Taking a taxi from the railway station is just like jumping a watch. The facilities of the hotel are half new but not old. I feel that it is an old three-star hotel that has be…
1, "The breakfast is very good, the location is not bad, it takes more than ten people to take a taxi to the railway station."
1. The first time I stayed in this hotel, I felt good overall. The waiters greeted me with smiles, and the service was considerate. The room was clean and warm. The deluxe room was also equipped with a LCD computer for free Internet access, and the Internet speed was fast, which was worth recommending. Next time I arrive in Shenzhen, I will stay in this hotel. Hotel feedback August 5, 2008: Dear …
1. The Home Inn mentioned just now should be Home Inn Shenzhen Railway Station, located in the fisherman village community.
1. Every time I book a hotel, I review it online and find that the hotel's evaluation is good and the price is reasonable. In addition to my own room, I also booked a room for the customer. It was really good when I arrived. The hotel upgraded my room for me in view of my problems with customers. It's the first time I met an upgrade. I'm happy. The room is spacious and clean. The waiter is warm a…
1. The top double room. We got off the plane and took a bus. The hotel was not very popular outside, but it was good inside. The air conditioner was sufficient, and the room was also good. The overall feeling was good. There was a seafood street across the street, and no one could afford to eat for two people. Ha ha, the hotel had a shuttle bus directly to Hong Kong, which was good
1. I didn't check in myself, but my friend did. The hotel seemed to have been newly renovated, so I felt it was pretty good. The cost performance ratio was quite high
1. The hotel environment is not bad and the price is not bad. I think I will live here in the future.
1. I always liked it, but this time I want to talk about several problems: First, the waiter at the door of the hotel is too cold and useless. The morning I arrived at the hotel, it rained and there were a lot of things. When I took a taxi, they actually stood there and didn't even stretch out their hands to pull the door. If you want a tip, I think someone else will give it to you. Suggest impro…
1. "Hotels with good cost performance also have convenient transportation. It is worth mentioning that the seafood street is not far from the opposite side of the hotel, which is very cheap and affordable. Next time I go to Shenzhen, I will stay in Guangshen."
1. This time, we stayed in the big bed room. The room facilities are fairly good, not as old as expected. The bathroom seems to have been cleaned and tidy. The service of the hotel was OK, and the front desk was quite responsive. Supplementary comments: On June 21, 2008, the breakfast was on the 25th floor, with few colors.
It's really worthwhile to stay at the oldest hotel in Foshan for more than 1300 yuan. At least, it can serve as a memorial to history. It's the first hotel in Guangdong with a domestic revolving restaurant on the roof. This hotel is recommended to eat authentic food, which has the local characteristics of Foshan. Whether it is Chinese food on the second floor or the revolving restaurant on the ro…
1. The front desk has an average attitude and is efficient. Although the room is a little old, it is clean and tidy. The facilities are complete and the steam bath is good. Cost performance is worth visiting
1. The price performance ratio of the Xuangong Hotel is relatively high (I stayed at 235 yuan this time). The main reason is that the location is really good. It is only 500 meters away from the main scenic spot of Foshan, the Ancestral Temple. It is also very close to the commercial street. There are Yingji Noodles, Dake and so on around. It is very convenient to eat. Although the hotel faciliti…
1. The customer paid a visit to the Foshan factory and arranged to stay in this old three-star hotel. Although the room facilities are a little successful, the price is not expensive. The key is that it is located in the city center, so it is convenient to shop and eat. For this house price, it's OK.
1, "Good hotel, good address, in the city center, the attitude of the hotel staff is very good."
1. The hotel is very good overall. I stayed twice. I feel that the 360 room is no different from the 410 room.
1. The location is average, the service is good, the price is on the high side, the surrounding environment is noisy, and it is difficult to fall asleep at night.
1. We live in a standard guest room. Advantages: 1. The facilities are quite complete. 2. The geographical location is good. Disadvantages: 1. The sound insulation effect is too poor. The sound of taking a bath and turning on the tap in the other room is just like ringing in my ear. I didn't sleep well all night. 2. The quilt is really hard and uncomfortable
1, "The address is good. It is located on the National Avenue. Because we drive by ourselves, it is easy to find. The room is too small and a little shabby. The restaurant on the first floor is very convenient. We have dinner there. It tastes good."
1, "The hotel environment and clothing are not good, but the room space is too small~~Don't declare too much baggage~~And the room space is OK~~The heart of Chinese food is not very good~~To improve~~~But it is fair~~Acceptable~~The western food is very good~~But the taste of food is ordinary and it is too long to wait~~To improve~~"
1. The location is good, the room environment is OK, the laundry speed is fast, which is commendable. The only disadvantage is that many floors are messy during the decoration.
1. The location is good, but the facilities are very old. Everything else was OK. I saw someone said that I could make long distance calls for free, but I made two local calls and charged me 2 yuan for local calls when I checked out.
1, "I stayed in the hotel on October 16. I felt very good. It was not very far from the bus station and the railway station. The room was very clean and the space was very large. The surrounding traffic environment was also good. Maybe the floor I stayed in was high and there was no noise. There was a small incident in the evening when there was a problem with the hot water pipe, but the service …
1. I stayed in the Chinese style big bed room of the hotel. The room environment and service quality are both good, that is, the floor is low. On the fourth floor (the whole hotel is only five floors high), it is generally good. That is, the breakfast is not a buffet, but a 10 yuan meal roll in the restaurant on the second floor, which is inconvenient for one person.
1. There are a lot of mosquitoes at night. I and my friends living in the other room were awakened by mosquitoes, and no mosquito repellent incense was found in the room.: (
1. The waiters here are very good. The problems they raised during the previous stay can be corrected in a timely manner. I would like to commend them.
1, "The room facilities are good, the service is no problem, the breakfast is also good, and there is no good choice for Jinhua to stay straight."
1. The front desk service was very friendly, and the surrounding transportation was also convenient. It's just that the carpet adjacent to the hotel bathroom is damp and a bit moldy. But the price is cheap and the cost performance is acceptable.
1, "We recommend the Japanese king size room here. It's very comfortable! Don't live in a room without windows. It's very stuffy. It's better to live on the fifth floor, and the sky garden on the third floor will attract many insects."
1. Overall, I feel that it is not bad, and it will definitely not affect my travel mood. I live on the first floor of the small building behind. The environment is good. Like a garden, the swimming pool is open. I can see people cleaning all the time. If the window of the balcony is not closed at night, the front desk will call the room to remind the guests to pay attention to safety. Additional …
1. The location is superior, the transportation is convenient, the hotel environment is good, the service is excellent, and the laundry is fast.
1, "I stayed in this hotel with my friends several times ago, and the overall feeling is that it's pretty good. Parking is very convenient. This time, I chose to stay in Yibin. The hotel has a good geographical location, convenient transportation, and a lively neighborhood. There is a barbecue nearby at night, which is very convenient for eating and living. The lobby decoration is OK, the rooms a…
1, "The room is clean and comfortable, and the air flow is also good. There is no bad smell... Because it is in the downtown area, the traffic is convenient, but it is also a bit noisy..."
1, "I stayed for 4 nights in March, and I felt good. It was better than Cuiyi. I came back in May."
1, "The hotel is located in the central area of Kunming. The geographical location is good, but the hotel service is a little poor. The first night there may not be many guests. The air conditioner is not turned on at all. I called and asked, saying that the central air conditioner should be turned on at night. As a result, it was not turned on at night, so it was hot all night. The next day ther…
1. The overall feeling of staying in Jinquan is good. It is clean and tidy. The broadband Internet is fast. The price is relatively high. There is a Wal Mart supermarket nearby. The transportation is very convenient. The service is up to standard. I will stay next time.
1. "Unexpectedly, this is an ultra standard 3-star hotel. I really like its wooden floor, which is not like carpet, and has no peculiar smell. The room is quite clean, and there is no sanitary dead space. The service attitude is also very good, and the lobby is very comfortable. The location is really speechless. It's super convenient, and you can go anywhere. In general, it's very valuable. The …
1. I have checked in many times and forgot to comment on them. Now I have made up all of them. Since the end of last year, I have been there two or three days a month
1, "The location is good, the service is OK, I hope the price of Ctrip will be more competitive in the future"
1. After staying for three nights, the overall feeling was pretty good. The most satisfied thing is the free upgrade provided by the hotel. The hotel booked a business standard room. Due to full occupancy, the hotel upgraded us to a senior business standard room for free. Like one here. One of the shortcomings is that the sound insulation effect mentioned by netizens is not very good. The other i…
In January and December, I stayed in Jinquan for a few days and began to book a small luxury business suite. Later, I changed to a business standard room, which was more cost-effective. The size difference between the two rooms was not too much. You can rent a cat from the hotel for free. The Internet is very fast through the power cord.
In January and December, I booked a luxury business suite in Jinquan. The interior environment of the room is good. The hotel is located at the edge of the city center, and the surrounding traffic is convenient. The price of taking a taxi to Kunming's famous Jinma Biji is just the starting point. The disadvantage is that Kunming is short of diesel fuel. There is no air conditioner. It is cold at …
1. This hotel is rather old, and the rooms at special prices are also very ordinary. Generally speaking, it is average
1, "The 158 room I stayed in was fairly good. The room is facing the road at the entrance of the hotel. The sound insulation is fairly good and it is not noisy. The bathroom is not too few, but the design is not reasonable. The shower faucet is too strong, and the water hurts when it hits me. Overall, it is fairly good."
1, "The hotel is very convenient. It is very close to the first floor of Fengfeng and the night market. The 10 yuan self-service breakfast in the hotel is very affordable. The service is also good, but the room is large but the facilities are old, especially the bathroom is small."
1. The room is good, large and clean. The breakfast was very bad. There was almost nothing delicious.
1. Although it is an old hotel, the equipment is complete and the price is reasonable. The location is very convenient: Jiefang Road is next to the main road, go straight south to the station, and go straight north to the iron tower. There are innumerable mobile phone stores around the hotel, so it is convenient to pay the phone bill or buy a stored value card. Complete equipment: even 220V to 11…
1, "I have checked in many times and forgot to make comments. Now I have made up all the comments. Ha ha. The hotel has my frequent guest record. I forgot to keep things in my room. Even if it is a small cell phone battery, the hotel also attaches great importance to it and immediately contacted me."
1. "Advantages: 1. The environment is elegant and the greening is good. 2. The waiters are very friendly. 3. The disadvantages of free shuttle service: 1. There are too many massage calls. 2. There is no bottled mineral water. Suggestions: 1. Provide fruit for the first time. 2. Provide free bottled mineral water."
1. The environment is very good. Although the hotel has been in existence for a long time, it is said that it has been in existence since 1992, and the room is a little small, but the service and environment are excellent. It is highly recommended and absolutely quiet. The only bad thing is the TV. The earliest 21 inch color TV may have no problem in my room. The TV can't be turned on when my fri…
1. The environment is elegant, but there are many mosquitoes. I killed 20 or 30 of them, and there are still fish in the boat among those who missed the net. The hotel has a pickup service, but the driver sent me recommended a one-day chartered tour the next day for only 150 yuan. However, the next day I found out that it was a trap, which delayed me a lot of time. In addition, the breakfast was …
1, "The room is really clean. My husband always says that I have a habit of cleanliness. I'm very satisfied with the cleanliness of Jinbanna's room. The service attitude is also very good. The first day I had to take a bath in the afternoon. I just turned on the shower and there was no hot water. I called the waiter and told him to let us put water for a while. The hot water came. Later, the wait…
1. Very satisfied with this choice. Jinbanna is really cost-effective. It is close to the city center, and the breakfast is rich. The villa type houses let people return to nature. The three stars are genuine
1, "Because there is free broadband, I booked a deluxe single big bed room... Here are some of my advantages and disadvantages: 1. The environment is good, the villa type house... coconut trees are planted everywhere... a big swimming pool. 2. The location is good, it belongs to the city center.. 2 minutes away, a large supermarket (for local people) ,.. It's very convenient to have a meal 3 minu…
1, "Because of the working relationship, I will go to live every month. It is the best choice to live in Jinhua City around 400."
1. Xishuangbanna is a beautiful resort. The hotel is also worth the price. It provides a wide variety of breakfasts with good service attitude. I would like to make a suggestion by borrowing your precious land. Xishuangbanna has many forests, plants and luxuriant vegetation. There are ethnic minorities living in the mountains, but they do not know that the fire is fiercer than the tiger. They oft…
1. Six of us stayed in Jinbanna for three nights, and everyone was quite satisfied. The room is a little small, but it's already very good relative to the price. The location was also good. There is also a large swimming pool. The restaurant is very good. We had lunch once in the restaurant, and both the service and the food were very good. The only problem is that the restaurant is too famous (i…
1. The hotel environment is very good, the business center is very friendly, the free shuttle service is very good, the room facilities are OK, but the bathroom conditions are slightly poor, there is no hair dryer, and the hot water will not be available until 7:30 in the morning. Besides, they always say that the lines are busy and you can't swipe the card, and the room charge should be paid in …
1. I have stayed in this hotel for many years mainly because of its good service and geographical location. But the rooms and facilities are too old. They should be redecorated, otherwise the cost performance is not high
1. The location is very good. I live in a high-end business room. I feel that the room is a little small. In addition, the cooling effect of the air conditioner is not good. However, the doorman and the waiter are very friendly. There are free fruits. The carpet and decoration are a little old~~~
1, "The location of the hotel is very good. It's a high-end business room. I feel the room is very small. The doorman and waiter are very friendly. There are also free fruits. The carpet and decoration are a little old~"
1. Not bad. The room is large, the facilities are quite complete, and the location is very convenient. The TV is a little poor.
1. It is still a very good hotel in Changzhou with high cost performance. The location is very good. It's only 5 minutes' drive from the railway station. The hotel has a certain history. The facilities are a little old, but the service is very good. Every day, some waiters will send newspapers, and now occasionally they also send snacks. Flowers will be sent on your birthday. ha-ha. In fact, for …
1. As a 4-star hotel, the decoration is relatively old but OK. The guest rooms are fully equipped. The traffic is mainly taxi. It's 7 yuan to the railway station and 10 yuan to Guancheng, which is convenient. The service attitude of the restaurant was pretty good. We came back late and the restaurant was about to leave work, but we were still fried with fish roe. The business of only 14 yuan has …
1. The appearance of the Great Wall Hotel is spectacular. It is one of the two four-star hotels in Jiayuguan. But it's too old. Advantages 1. Walk 10 minutes from Xiongguan Square. It's very convenient for eating and shopping. 2. After all, it is a four-star hotel, and the room facilities are quite complete. 3. Every day, the waiter sends two bottles of hot water to the room and another bottle of…
1, "Because of the working relationship, I will stay every month. It is the best choice to stay in Jinhua City around 400. The service is very good, the breakfast is very good, and it is also close to the city center. The standard room of 360 has a slightly old decoration style, but it is still clean and tidy. I strongly recommend it. The front desk service gives me a good feeling every time. It …
1, "The hotel facilities are a little old compared to the 4-star hotel, and the Internet charges are unreasonable, but the waiter is the most enthusiastic I've ever seen. Not only did he run to the third floor (I took the elevator, but the elevator door broke, and she went out to play with it, and the door closed) to open the door for me, but also went in to open the door to help me with hot wate…
1. It's quite old, but I think it's OK overall. Service was pretty good too.
1. The lobby of the hotel is very large, very impressive, and the service is also good. We arrived at midnight. The front desk service staff is still very friendly and fast. The room facilities are very good. Under our window is the restaurant of the hotel. The waiter still reminds us to close the window at night. I don't know why. Is it really so unsafe? We listened to the advice
1. The appearance of the Great Wall is very distinctive. Obviously, in order to save electricity in the daytime, the lobby does not turn on the lights... It seems that the number of people checking in is a little small. In addition, the check in formalities are a little interesting. What kind of check in notice should be issued...
1. The location is good. It is very close to the airport bus station. It is convenient to eat around. There is a Qiqi hot pot that is good and cheap
1. I stayed one night and felt it was pretty good. The waiter's attitude was very friendly. Although the room was not big, it was clean and tidy. The best thing is that the location is good. It takes less than 5 minutes to walk to Shangqingsi Station of the airport bus, and it only takes about 10 minutes to walk to Chongqing Railway Station. A Qiqi hot pot near the hotel is especially recommended…
1, "I live at Home, which makes me feel at home as a drifter doing technical services. I like it very much!"
1. Friendly service, convenient transportation, less varieties of breakfast, but clean. I will stay in Chongqing next time~~~
1. The transportation of the hotel is not very convenient, the elevator is very slow, and the rest is home like.
1. I stayed in this hotel before, but it was managed by HILTON at that time. Now it is NIKKO, which is obviously not as good as before, and the facilities are also somewhat outdated. However, in the five-star hotel in Dalian, the price of this hotel is relatively reasonable. There is a new fashionable living area near the hotel, and some good restaurants and coffee shops are good. The comprehensi…
1. It can be said that it is the best hotel in Jinhua, but not the most cost-effective. Jinhua is no better than it, but the same star is not the best. Let's go. The price is a little high
1. A very good hotel. There is nothing to be picky about.
1. Advantages: 1. The room is large and clean. 2 The location is very good. It's very convenient to go there. 3 Good service attitude. Disadvantages: Not found yet.
1, "The facilities of this hotel are really very good. The location is also convenient, and the lobby is magnificent. Because there is no room type I reserved, the hotel will be upgraded to a senior room when I arrive at the front desk. Overall, I am very satisfied."
1. A very good five-star hotel. The room is also very clean, but the TV is too small, and it is far from the bed, so I can't see it clearly. The attitude of the service staff was also very good. I will definitely stay again next time.
1. The MM at the front desk is very good, efficient and has a very good attitude.
1. The TV is too small to see the subtitles clearly. The service staff are very good. The MM at the front desk had a very good attitude
1, "The lobby of the hotel is very good, and the rooms are also very good, warm and comfortable. It is a good five-star hotel."
1. It's a very good hotel. The room is spacious and the bathroom design is good, but the drinking equipment in the room is insufficient. I brought some bottles of good red wine from California, but there was no glass, but the hotel will deliver them right away. The service in the guest room and the concierge was very good. The price of this five-star hotel in Dalian is reasonable (but it is still…
1. The service was not very professional, the processing speed was too slow. However, because of the waiter's small mistake, the assistant manager came to apologize in person, which was very touching.
1. Excellent management! The detail service was of an extremely high standard, worth recommending! It feels like an old hotel
1. Better than expected. It seems that the Golden Key Alliance still has some quality control. The room facilities were OK, but the smell of smoke was too strong. When I came back, my pajamas smelled of smoke. Breakfast is very ordinary, and there are few choices. However, the service ecology of Pakistan is very good. Just by the Yalu River, the surrounding environment is fairly good
1. I went with my parents, so I stayed in the family room and didn't see the invincible river view. On the whole, the hotel was clean. There are especially many Koreans. But there is always a strange smell in the room. The toilet occasionally leaks, and the shower head is designed to splash water easily. Breakfast was not very good either. Although there are many shortcomings, it is already the t…
1, "Facing the Yalu River Bridge, with binoculars and darts, we have no words about the facilities! The scenic spot is very good downstairs!"
1. This Spring Festival, I went to Jinhua to play and stayed at the International Trade Center for a day. Overall, I felt it was very good. The hotel's hardware and service were very good. It's just that there is a charge for accommodation and parking. Although the charge is not high, it feels awkward. This seems to be a common problem in Jinhua Hotel. Also, the breakfast is 88 yuan, which seems …
1. Upgrade to "Korean style room". Go in and take off your shoes and put on the kang. There are only two big bed cushions on the kang, which is a little shabby. The toilet seat is equipped with a flushing device, not bad!
1. "Colleagues said that everything was good. They would like to stay in this hotel next time they go on a business trip."
1. I chose the big bed room (it has just been decorated, and there is still a smell of decoration in the room); The indoor facilities are the same as those of the single apartment, which is not bad. The bed is also comfortable, but my skin may be stingy. I feel the bedding is a little hard; And the big bed room, like the extra room, has gone out of the security door: (According to the waiter, the…
1. It is the first time to stay in Ningfeng Hotel, which is located in the city center and convenient for shopping. The room is decorated in a fashionable and warm way, the articles are clean and comfortable, and there are free flowers and fruits. It feels like home, and the service is warm and considerate. The only problem is the road at the gate, but I heard that it can be repaired on May Day. …
1. The environment is good, the service attitude is very good, the location is also very good, and the transportation is convenient. 198's price performance price ratio is quite high. The room decoration is very fashionable, as well as the LCD TV. There are fruits and newspapers delivered every day. Since I slept late, I couldn't evaluate the breakfast. I was quite satisfied with my stay. If I we…
1, "I felt very good about the hotel I stayed in this time, because I paid great attention to the environment and would check the comments every time I stayed in the hotel, so I chose this hotel, and the place was also very easy to find. We stayed in 395 rooms, but they gave us a room worth 888 to experience. It was really comfortable. Breakfast was worth 88 yuan, very rich, really excellent, hig…
1. I originally booked here because it was cheaper on the mountain. Later, I found it was much better than I thought. At least it's clean. It's just that the sound insulation effect is not very good. The people next door go to see the sunrise in the morning. The noise is very good
1, "When I stayed in this hotel on the night of April 23, the receptionist first gave me a room between two buildings, which was very unsatisfied. I went to the receptionist to change a room, which was OK. I don't think the hotel should give the bad room to the guests first After walking for a while, it was really beautiful. I felt that if I stayed on the mountain before or at the foot of the mou…
1. Surprisingly, a highly recommended hotel. It's a great place to visit the Xihai Grand Canyon. This is the third time I've been to Huangshan Mountain. I know it's wet. After reading this post, I have been prepared. But this hotel room doesn't feel damp at all. The electric heater works well (Siemens), and the room is warm enough. I remember coming to Huangshan (10 years ago and 23 years ago res…
At 11:00 p.m. on July 16, 2008, I checked in this hotel because it was very close to Zhangjiajie Lotus Airport, and it was less than 10 minutes' walk. There was a tall and thin young man at the front desk. Although it was very late, the young man's attitude was very good. The room gives me the greatest feeling that the bed is very clean and comfortable. The bathroom is equipped with a hair dryer,…
1. I stayed in three hotels in Sanya this time. The first one is ordinary in Sanya Bay. I feel it is clean, but there is no hot water. I found a gecko when I entered the room, which was very scared. The next day, I stayed in Titianyu. Although I felt that it was not as good as Sheraton, it was the best one among the three hotels in Sanya, but breakfast was too expensive and there was nothing to e…
1. "Generally speaking, it is good, but the service attitude and standard need to be further improved"
1. The reason for choosing Pearl River Garden is that it is convenient. There are escalators directly to the seaside. There are restaurants, food corridors, shopping malls, supermarkets and stalls all around. The decoration of the hotel is average, but it is clean and tidy. The swimming pool is on the roof of the lobby, so it is very small, but my daughter likes it. The breakfast is western style…
1. I stayed in the Pearl River Garden Hotel for a few days on December 20. I felt pretty good. I could go to the seaside when I left. However, I was hungry in the afternoon. The hotel had nothing to eat and was not open even when I went out. I felt very uncomfortable. However, the hotel seemed pretty good when I came here. Compared with this time, the price was pretty good. As mentioned earlier, …
1. The only advantage of my stay is that I can see the sea, but the room is very small and old. It is an old hotel. If I have the opportunity to come to Dadonghai next time, I should not choose this hotel. The only advantage of this hotel is that the transportation is convenient. Although it is an old hotel, the hygiene is very good. Supplementary comments on December 24, 2007: The room is too sm…
1. The hotel environment is fairly good. It is relatively close to the bus stop and convenient to travel. The average waiter is very kind and will take the initiative to say hello to you, but looks like a manager who never says hello. What was more depressing was that one day the waiter took a bottle of drinks from the expired refrigerator and didn't hand it over clearly. The next shift staff mis…
1. The reception service at the front desk is very poor. When I went to the front desk to go through the formalities, I ignored them. I lived in three buildings, but I didn't have a house with the front desk. It was difficult to find it. There was no waiter to take me there, but the room and environment were OK, and the air was very good!!
1. Choosing Xinxing is mainly about its geographical location. The airport bus is close to the gate and the West Railway Station. There is a subway to go shopping, and it is close to the urban and rural trade center and Cuiwei. As there is no ordinary standard room, the luxury standard room is not too different. Although facing the street, it is quiet to sleep at night because of double glass. Th…
1. I have been there once. This time, I also booked a room from Ctrip, but I don't seem to communicate well with the front desk. I can't find our name when I arrive. It's strange
1. The hotel is very close to the long-distance bus station, and it is only 5 minutes' walk away. The overall environment was pretty good, the room was very clean. I stayed in a standard room. As a three-star hotel, I feel very good. Very satisfied with the service attitude. Walk along the road in front of the hotel and you will find Mingsha Mountain. 10 yuan for a taxi, 1 yuan for a bus, and the…
1. Frankly speaking, the hotel is better than I expected. It belongs to a better category among three star hotels. Employees have a strong sense of service, unlike mainland cities. However, the price of Ctrip is not competitive enough. The tour guides who meet customers at the railway station can provide better prices (the traveling companions who meet on the way tried).
1. I stayed in a standard room for 680 yuan a night. My wife and I were very happy. We went from Lanzhou to Jiayuguan and then to Dunhuang. Only this hotel's service reached the level of a 4-star or 5-star hotel, which was very friendly and proactive. You can see Mingsha Mountain from the room, and the landscape is first-rate. The food in the restaurant is average. The buffet breakfast is mainly …
1. The environment of the hotel is good, it is quite distinctive, and the annex building is quite ordinary. Didn't use the service staff very much. I felt that the service was good.
1. The natural environment is first-class, and the interior decoration (attached building) of the hotel is also quite good, not luxurious, but very clean and refreshing. The overall feeling is quiet and freehand.
1. The environment is very good, the garden is very large, the service ecology is also very good, and it is very convenient to be close to the airport. It is good. I will consider checking in again next time
1, "It's far from the downtown of Huzhou, so it's not very convenient to take a taxi. However, there are buses at the entrance, and there are many shifts. It's better to own a car. The lake view room is not near the lake, but can only overlook the Taihu Lake. The hotel is quiet on the mountain. There is no service charge for room delivery, and the dishes are relatively cheap. The only thing is th…
1. First class environment, deep courtyard, small bridges, flowing water, withered vines, old trees and crows. Multiple stays. It's just that the breakfast is extremely poor. I hope it can be improved in both China and the West.
1. "I really like the environment in the western suburbs. The black swans, red crowned cranes, and small wild cats in the western suburbs are the comfortable places to rest in the bustling Shanghai. I will live here when I go to Shanghai."
1, "Because children are afraid of the sound of firecrackers, we have the habit of staying in hotels on New Year's Eve and the fourth day of the lunar new year every year."
1. The standard rooms of the VIP building are well decorated and can meet the three-star standard. The service was also very good, very quiet at night. When I checked out the third day after two nights, the Internet was unavailable and I couldn't use credit cards. At that time, I was very depressed. Because I didn't bring much cash, I went to the bank to withdraw money to pay the room charge. Hot…
1. The location of the hotel is not bad. It is relatively close to the railway station and Wal Mart Supermarket (you need to take a taxi). The lobby and the parking lot in front are relatively spacious. The facilities in the room are also good. There are three shortcomings: first, the network is unstable. Several rooms cannot access the network. The network cables and sockets are very old and occ…
1, "The villa is very quiet, the air is very good, the transportation is convenient, and the room air conditioner is not too cold"
1, "We stayed in the hotel during the Spring Festival in 2008. As far as the price is concerned, it is generally good. But the door card could not be used to open the door twice, so the waiter was asked to open it. Their service attitude is good, which is commendable. The bathroom is a little small. If we return to Xiangfan again, Jincheng is still our first choice (of course, if they do not incr…
1, "The room is clean and tidy, the waiter's attitude is very good, but the restaurant is average. The set meal on my breakfast coupon is not consistent with the set meal in the restaurant"
1. Not bad. It should be more in line with the three-star standard, not too expensive. It may be the signing price with Ctrip!
1. Generally speaking, it's OK. I live on the 15th floor, and the water pressure for bathing is a little low. Everything else was OK. It is about 17 kilometers away from Longmen Grottoes. The broadband speed is good.
1, "The location of the hotel is good and very convenient. The best thing is that the next door is Bada Airlines. There is a bus from Luoyang to Xinzheng Airport in Zhengzhou, which is very convenient. The latest flight starts from Luoyang at 2:30 pm. The hotel room is good, but it smells. I can't stand it: (This problem is not resolved, I really don't want to stay next time. Besides, the price i…
1, "The overall service was good, but the sound insulation in the room was too poor. The sound in the corridor was just like in the room. The breakfast was also OK."
1. The hotel environment is very good, and the transportation is very convenient. There are many places to eat nearby. I can still eat easily when I arrive at midnight
1. No room facilities
1, "I arrived at this hotel on the evening of the second day of the lunar new year. The hotel environment is very good. The back mountain is the tourist area, and the front is Wuyi Square. The room facilities are average, but the service is very friendly, and fruits are also given away."
1. The environment and service were quite good. The biggest drawback was that it was very inconvenient to take a taxi in the morning. It often takes 10 minutes to wait
1. It's really good. I'm also very satisfied with the breakfast. I will choose this hotel when I have the opportunity to go there
1, "In a few days, I still choose to stay in this hotel. What should I do? I can't forget the delicious breakfast here. It's very convenient~"
1. The environment is beautiful, the waiters are warm and generous, and you feel at home. Next time you go to Fuzhou, you will stay in Yushan Hotel!! I still can't forget the breakfast there@_@
1. Is it a sloppy 3-star hotel? The location is OK. It is close to the square. However, the surrounding environment is too poor and noisy. Besides, there is no taxi at the door, so it is inconvenient to go out.
1. The service in the hotel was very good. I went to a deluxe big bed room I had reserved. Later, because there was no room type I had reserved, I was automatically upgraded to a business suite. This is quite comfortable. Besides, breakfast is OK now. Because it is not far from the airport, the noise of the plane is quite loud. Hotel feedback: March 14, 2008: Dear guests, thank you very much for …
1. The environment is good, and the air is fresh and quiet. It is a little far from the city center, but the traffic conditions are good. It is suitable for city people who have self driving to spend their holidays and leisure. The service is good. Miss Zhou from the sales department never tires of asking questions. About 5 minutes walking outside, there is a street of Taihu Lake boat dishes and …
1. I feel very comfortable and happy living here. Any problems can be solved in a timely manner. Both the assistant manager and the waiter are very professional and the service standard is first-class. Breakfast is very rich. Xuanwu Lake can be seen in the revolving restaurant.
1. First of all, I'd like to comment on the room on the 6th floor of Xuanwu Hotel. It's really bad. It's only 3-star standard at most; The rooms above the 8th floor are obviously redecorated, which is much better; When we checked in, we asked for 6 rooms at once. An assistant manager at the front desk upgraded us to a deluxe room, which was above the 12th floor. The room was much larger, and the …
1. As an old hotel, I felt that the environment and service were of a very high standard. It's very close to the subway, so it's very convenient to go out. However, according to the cost performance ratio of five-star hotels, Nanjing people say that this hotel is not very cost-effective. I feel good living by myself. I ordered a city view room. The bed was very large and soft. The room near the c…
1. The transportation is very convenient. The service is also good. There are many places to eat not far from here. It's very good. It's just that it's troublesome to use the room key for the elevator. Additional comments on July 14, 2008: There are fewer TV stations, just a dozen or so. There are many foreign stations, and most domestic local stations cannot see it. This is not good.
1. It's a good restaurant. The food is also good. It's worth living here in Weifang
1. The service was pretty good, but the room, especially the bathroom in the north facing room, smelled bad. Suggestions for improvement
1, "I went to live in Weifang for two nights last week. I originally wanted to live in Weifang, but there was no room when I booked it. Ctrip recommended this one. The service was really good, as well as fruit. Miss Yan Lei also called to greet me personally. She went to Weifang seven or eight times a year, so I have lived here often."
1. Generally speaking, it was pretty good. Apart from the smaller bed, the larger one was replaced. The new decoration and service were also pretty good!
1. It's a good hotel. Breakfast is also OK. There are gifts for Ctrip when it is booked. There are also greetings. The newly decorated hotel is very good. There are rose petals in the toilet.. Hehehehe
1, "The hotel service is of a very high standard, always considerate of customers. The room is clean. I will check in again next time. Additional comments on July 2, 2008: Miss Yan Lei's service is very good."
1. The geographical location is OK. It is in the center of the county seat, and it is convenient to travel. Besides, the river is next to it, and the scenery is reasonable. But because it is an old hotel, the equipment is of course very ordinary. And the breakfast was terrible -- there were only 8 kinds of breakfast, which was not like the breakfast provided by Samsung standard! In addition, you …
1, "The room is newly decorated. It uses light colors. It feels very warm. The layout is reasonable and spacious. The cloth selected by the hotel is very particular. I feel thick and soft when I put it in my hand. The service is considerate, especially when I bring a lot of clothes on business trips. The waiters can consider the actual needs of the guests and add clothes hangers at any time. The …
1, "The service was good, the catering was very good, and Block A should be redecorated. Additional comments: February 20, 2008: I felt that it was not as good as Yuanfei Hotel on the whole."
1. "This time, I found that there was a lot of effort in service. For example, there were newspapers in the hallway and the bathroom. The breakfast buffet service in the restaurant and the elevator service were very considerate. In fact, the hotel's service hardware need not be very luxurious, but we should treat the guests sincerely. I hope we can stick to it."
1. The rooms and services of mature hotels are pretty good. The business rooms are equipped with LCD computers and the Internet is very fast. In particular, there is no problem of poor sound insulation of general economy hotels. The location belongs to the city center, and it is not far to go anywhere. Disadvantages: When I get out of the elevator, there is a strange smell. Is it summer moisture?…
1. It costs 12 yuan (plus 1 yuan for fuel) to take a taxi to the passenger station. It's economical, so I'm just satisfied. It's mainly because the price is there, and I'll get it if I have the chance. The main reason is that Fuhua Amusement Park, the largest amusement park in Shandong Province, is relatively good and convenient.
1. This hotel is located near Xinjiekou. It is convenient to eat. The service provided by the hotel staff was also very good. Gu Xinfeng, the director, helped me check in. Because they were doing hotel renovation, they helped me upgrade for free! The room attendants were also very considerate. I was very satisfied with the service when I arrived. The newspaper sent here was also accompanied by a …
1, "1 As previously commented, the service attitude was very good. The reception at the front desk was very good. 2 The room supplies and facilities were OK, but the windows could not be opened. It was a bit depressing. The air conditioner was turned on
1. "Several times I stayed in this hotel, I felt that" customers are God ". Especially every time I checked in, Mr. Wan Peng, the receptionist, gave us meticulous and thoughtful service, which made us very happy. This is why we always like to stay in this hotel every time we come to Nanjing. I talked to my friends about the hotel, and they also said that they would try to stay in this hotel next …
1. The hotel added 40 yuan to upgrade the hotel to the executive room. The room was pretty good, quite new. The waiter is an intern, unskilled but serious. The front desk attitude was also very good. But the room is in some condition. In the middle of the night, I had no choice but to ask for a room change. Later, I agreed. Overall, I felt it was pretty good. The location of the hotel is also goo…
1. Extremely good hotel. The service was very good. After arriving at the store, I knew that we were staying for the first time. They upgraded the room to an apartment for free. The facilities in the room are very good. I like the decoration style very much. The front desk was sent to the room, and the waiter helped us change our slippers and make good coffee. The only pity is that the parking lo…
1. For the first time in China Travel, it is the first time to stay in such a good hotel. Mr. Hao, the director of hotel service, pays attention to the main guests. He feels that he is more powerful than a five-star hotel in pushing people to stay than you can imagine. All hotels in China are the best
1, "The service attitude of the front desk room is very good! Breakfast is very rich, and the room price is very clean. Keep working hard! Chinese hotels have fewer non-smoking rooms, or putting the ashtray in the drawer is non-smoking treatment. Do 75% non-smokers like us need to endure 25% more smokers? I hope that Chinese hotels can learn from foreign companies. Please set more non-smoking flo…
1. My friend in Beijing lost a camera line, but he has already arrived in Jinhua and called the hotel. The service staff is very dedicated and responsible. After finding it, he will express it to Beijing. Thank you here!
1, "I booked an administrative room, but the hotel gave me a free upgrade to an apartment, which is their new house. The room facilities and decoration are very good, and I can delay checking out until 3 o'clock. The location is good, the transportation is convenient, and the restaurant is also convenient. If I go to Nanjing next time, I will stay here, and I like it very much."
1. I checked in on July 29. The waiters on the fifth floor are of 5-star standard. Great. The manager of the housekeeping department is kind and has 5 stars. It's just that the height of the shower faucet is too low. I have to stoop down to wash my hair. It's a fly in the ointment.
1. It's a good hotel. The service is very good. The head of the front desk not only helped us upgrade for free, but also took us to the room. The room is large and comfortable, with a large LCD screen, free drinks and snacks. Soon after entering the room, a waiter made coffee. Especially when we left, the waiter also helped us get some drinks to drink on the way and prepared two newspapers. In sh…
1, "It's an old hotel. The room is clean and tidy, but it's a little far from the five-star hotel. The bathroom is also very small. The things are old."
1. When I arrived in Nanjing this time, I learned that this hotel is a hotel jointly operated by Nagoya and Nanjing. The name of this hotel is one word for each of the two cities. No wonder it feels a little strange. It belongs to an early five-star hotel. The management is relatively perfect, as shown in the aspects of checkin/out, service, elevator speed, etc. The only thing is that it is not e…
1. The room is a big bed room, which is similar to the situation introduced by the bobbins. The room will be upgraded for free, with two bottles of free cola. The overall evaluation of the hotel's service is just reasonable. However, it is a bit excessive to evaluate the five-star hotel. Four stars are almost there. Of course, in terms of cost performance, it's OK. After all, it doesn't cost a st…
1, "The hotel room is spacious and tidy, with soft lighting, which is generally good. The attitude of the receptionist is also very good. However, broadband still needs to be charged. Should this be improved?"
1. It can't impress people. The price of the old five-star is relatively low... You can stay..
1. The hotel is not bad. Although it is a little old, the Japanese side has also withdrawn its capital. Maybe Nanjing is not that far away from the hotel to Xinjiekou and other places. The service was also very good.
1, "The guest has stayed for several times. I think it is very good. I hope it will continue..."
1, "The train was late, so I temporarily changed my mind to stay in a hotel, but I didn't deliberately choose. However, the Quzhou Hotel was not bad. Even if I checked in in the morning, the front desk had to count the day before. I charged for a full day's room. It said that Ctrip booking was just like this. It cost me a day to catch the train after sleeping for a few hours."
1. The Chinese restaurant is definitely not a five-star restaurant: when I went to the Chinese restaurant on the second floor at more than 8 o'clock in the evening, no one ate. The restaurant environment was just like a small shop, and the tableware was very ordinary. There was no napkin or toothpick on the table. Serving is also slow.
1. It seems that I have checked in for the second time. This time, the standard room environment is not good, the room is not clean, and the TV is not good
1. I live in a business suite. The price of 650 is not cost-effective. I feel that the room configuration is not up to that level. The sofa in the hall is still cane chair... Probably want to show some tropical style? Felt bad... The lobby and internal environment of the hotel are OK. The service provided by the staff is OK. If the room price can be reduced by 50-100 yuan, it is appropriate......…
On June 8, the iPod and lanyard headset left in Room 3226 have been received. Thank you for Baiyun Villa! This time, we were very impressed by the Chinese restaurant food and hotel management services in Baiyun Villa!
1. It's a very good hotel. I live in a business room. The Internet speed is very fast. The download rate reaches 2M/s, which is very cool! I met old friends in the hotel The world is so small!
1. The location is superior, and the attitude of the waiters is quite good. It is worth recommending.
1. At present, it is the best hotel in Xinchang. The environment and service quality are very good. The domestic length of free broadband and free broadband are very attractive. It is only a short distance from the Buddha Temple. It is too convenient. Additional comments: May 4, 2008: can you not avoid the Chinese restaurant on the first floor of the hotel, which is called "sliced chicken" and "f…
1. The hotel is opposite to the Grand Buddha Temple scenic spot, which is easy to find when driving down the highway. The big bed room in the VIP building is large and clean, and the scenery outside the window is not good. There is a computer, but it costs 35 yuan a day. You can use your own notebook for free. The buffet breakfast is very good in the four-star hotel. There are many kinds of food,…
1, "The service provided by the waiters in the hotel is very standard, and there are many kinds of breakfasts. It is close to the roadside, and the surrounding environment is a little noisy. Large trucks have sounded their horns very early. It may be because they live too high (on the sixth floor of the top floor). There is no hot water in the evening when they take a bath. It takes about one min…
1. The front desk lady called at 0:30 in the morning to ask about the room card, which disturbed my dream and kept me awake all night. It's a trivial matter. Why can't I be contacted the next morning? The service is not considerate and needs improvement
1. The facilities are very good; The surrounding environment is good, close to Golden Beach; Insufficient sea view room recommended: relatively biased; Eat without defecation; The restaurant provided by the hotel is not cost-effective. The price is too expensive, and the taste is not good;
1. The sea view is very good. It belongs to the best in Weihai. The service was fairly good, but I didn't leave a particularly deep impression. The facilities in the room are pretty good, but 70% new, not as good as the Blue Sky Hotel. I don't think breakfast is much better than thirty-eight, but it costs sixty-eight yuan. The sound insulation of the room was very poor. Several people moved in ne…
1. "The location of the hotel is very suitable for summer vacations. The hardware facilities are inferior to 5 stars. The service is up to standard. The breakfast buffet is relatively simple, and it is difficult to take a taxi."
1. The hotel is a little old. The room is small, but the hotel seats are good. It's right at the seaside, and you can go swimming directly. The sea view on the 8th floor opens to the sea. If you want to live in a busy area, this is not a good choice. However, Weihai is really small, and it is still quite cheap to take a taxi. There are few taxis outside the hotel at night.
1, "The hotel's accommodation environment is average, the room decoration is average, and the transportation should be very convenient. Hotel feedback: January 2, 2008: Thank you for your stay and comments! We also have a special standard room newly installed in 2006, and the room status is basically four-star standard. Welcome to try again!"
1, "The sea view room we booked this time is a little better than the environment when we checked in last time. The location is also close to the sea, which is easy to find. Unfortunately, there is no hot water in the evening, and it is all cold water. I don't know whether it is because the boiler is too small or for some other reason. When the hot water is turned on the next morning, it suddenly…
1. It's good to stay in such a hotel in Quzhou. The room has a LCD TV, and the window looks like a river. It also delivers fruits. It's good, but the surrounding environment is ordinary, so there's nothing to visit
Arrived at night on the 1st and 7th, and left at noon on the 9th. The two storey Russian villas scattered among the trees are quiet, but cicadas shout too loudly (they don't rest until about 12 o'clock in the evening, and they will wake up and sing after 6 o'clock in the morning). It is 5 or 6 minutes away from the seaside. The Wasili tavern in the hotel has an unspeakable environment, and the pr…
1. The environment of Friendship Hotel is absolutely first-class, and the service attitude is even more refreshing. Our family has spent three beautiful days here, thanks to the good service of the hotel, and even more thanks to Ctrip's accurate booking. The only disadvantage is that there is no service guide for the rooms in Friendship Hotel. Even simple tips, such as restaurant location, dining…
1. The Friendship Hotel has a beautiful environment, fresh air, decent hardware facilities and good service. The Russian style dinner in Vasili Tavern is very distinctive. There are many foreigners here. Living here is like a holiday abroad. It is three minutes away from the hotel's dedicated bathing beach. As advertised, I have been to Beidaihe many times. The environment here is the best. I wil…
1. The reservation is for a business king size room. The room and bed are large enough. But the air outlet of the air conditioner is facing the bed, and it is still a little cold even when the breeze is turned on. The air conditioner is fixed on the wall, so you can only walk to adjust the air conditioner, which is inconvenient. The TV is a little small, and it is not flat, which is a defect. Eve…
1. It's very good. The room is very bright, not oppressive. It looks very clean, but the bathing place is a little small, but the water is very large.
1. The hotel is good, but the TV is a little small. I will stay next time.
1. "Generally speaking, it's pretty good. The only thing is that the toilet facilities are a little poor. There's nothing to ask for. Also, it seems that the membership card is too expensive. At least as far as I know, Greentree is free."
1, "Their bed is too hard, and their back hurts when they sleep! The room is a little old, and the sound insulation is not very good. In the middle of the night, a few people live in the room next to each other. The noise is noisy anyway (but it has more to do with the quality of the residents)! There is no electric hot water kettle in the room, only one pot"
1, "I went to Wuhu to have my nephew's wedding party, 10 people, and booked 5 standard rooms from 24 to 26 days. Before I stayed, I saw the comments, and I was horrified. But after I stayed, I felt better than I thought. In such a city, the price should be pretty good. The disadvantage is that I live on the fourth floor, and there is a large platform in front of the window. The scenery outside th…
1. "Generally speaking, it's OK, mainly because it's convenient to do things at the right time. In the future, I will basically live here."
1. This is my second stay in the hotel. The hotel is in the center of the city. Unexpectedly, the hotel has parking service, which makes parking very convenient. When checking in, the receptionist is also polite and friendly. The room I stayed in was standard B. The room was good. When I checked out, the bellboy took the initiative to help me carry my luggage. The front desk clerk operated quickl…
1. Before checking in, I still felt uneasy after reading the comments above. After checking in, I felt it was OK. In Wuhu, it's really good to be able to stay in such a hotel. I will choose this hotel when I go to Wuhu in the future.
1. The room facilities are old, food and beverage are expensive, the service is good, and there is no landscape. The appearance is better than the Lion Forest
1. It is really the best hotel in the mountain, with very good environment and facilities. This time, we live in Room 7201 of Shuguang Villa. The other villas are row of bamboo and wooden houses, with four rooms in a row. Our room is separate and cement, so it is soundproof. There are three such rooms in the villa area. The facilities are complete. There is a hairdryer, and the water and heat are…
1. Even in Shanghai, it is also a very good hotel. Although the price is high, I feel I can afford it. It's a pity that I didn't see anything in Huangshan this time. I will definitely come back next time, and I will definitely stay in Beihai next time!!!!
1. The price of 600 yuan for one person's stay is a little extravagant, but the environment is OK, better than expected, and cleaner. The water is sufficient. According to the waiter, the bedding is replaced every day. I heard that the water on the mountain is 48 yuan | tons. For the fatigue of Huangshan Mountain, it is very important to take a hot bath and have a good sleep. Generally speaking, …
1. After checking in the Dawn Villa, I found that the room was very small and seemed to be very damp. The most annoying thing was the discovery of mice. Later, I added money and changed into a standard room in the hotel. The dinner served in the restaurant is delicious, but the price is small and expensive. After all, it is on the mountain
1. After the treatment of Tangkou Hotel and Xihai Hotel, Guomai is undoubtedly a surprise. The room is spacious and tidy, which can at least ensure a good sleep. In other cities, the national network may not be up to four stars, but if Xihai hotels and others can be regarded as four stars, the national network is really cost-effective. The location is good and the price is cheap. It is the most s…
1. Good cost performance and convenient transportation. The executive floor felt very good, but the upstairs was decorated at 8:00 in the morning, so noisy. The Chinese restaurant is too low-grade. Although it is cheap, it does not match the hotel.
1. The hotel attendant was very kind. I was caught in the long-distance bus stop by heavy rain. After calling the hotel, I sent a car to pick me up. The room is too old and smelly. Overall, the service was fairly good.
1. It is close to Gongbei Pass. The standard room is too small. The deluxe king bed is good. The service is good. The breakfast is not good. It is too hasty
1. The hotel is an old four-star hotel. The facilities are relatively old, the rooms are very small, and the health scale is still bad. The overall feeling is average, but the price is still based on the new four-star hotel, so I don't think it is worth it.
1. It is close to Gongbei Pass, the standard room is too small, the deluxe king bed is good, and the service is good.
1. It is convenient to walk 15 minutes from Gongbei Pass. The deluxe standard room of the hotel is too small, and the toilet facilities are a little old, but the hot water is sufficient. It has changed a lot when we changed to stay in the 07 series rooms (such as 16071107). We learned from the local travel agency that the price they booked is 300 yuan, which is different from the price of 350 yua…
1, "The service and facilities are very good, but the sound insulation of the room is really poor. The hotel feedback on December 28, 2007: First of all, thank you very much for choosing the Oriental Hotel, and also thank you for your valuable comments. Recently, the hotel is building a western restaurant on the top of the building, and there will be some noise sections at the beginning of the co…
1. The room area is large, the service is OK, and I'm satisfied on the whole.
1. This time, we ordered two deluxe single rooms over the phone during the period of "51". On arrival, like a suite, the deluxe single room is one room, one living room. It is located on the 22nd floor and has a wide view. There are many travel books about Luoyang in the living room. The location of the hotel is also OK. It is only 12km away from Longmen Grottoes and 1km away from the city center…
1, "The hotel in Luoyang is good, the restaurant is OK, and the service is also good."
1. It is far from the railway station and bus station, which is not conducive to self-service travel! But the environment and service of the hotel are good
1. The transportation is convenient. The room is relatively dry, quiet and spacious. Generally speaking, it is reasonable.
1. The hotel is very good and cost-effective. Although it's on the busy road in Luoyang, it's very quiet at night and I can sleep very well. At the same time, it is also convenient to go to Longmen. There is a bus. You can take a taxi to Longmen for about 24 yuan.
1. The hotel's facilities are very good. The rooms are large, the facilities are new, and the beds and quilts are very new. The toilet is also dry and wet. The attitude of the service staff was also very good, they said hello whenever they went in or out. There are too few tables in the lobby for 2-3 people. Also, house prices in Quzhou should be on the high side.
1. The attitude was good, but the service was poor. There was nothing else left~
1. The room size is appropriate and the decoration is old. The surrounding environment is good. It's very close to Bailu Island. It's only a few minutes' walk. It's good to walk at night. The swimming pool is outdoor and the facilities in the changing room are ordinary. The room smells of smoke.
1. After the second check in, the hotel provides free airport pickup service, and free iced drinks after taking the bus. The staff in the hotel are very friendly. No matter what department they work in, they will smile when they see you. The facilities in the guest room are a little old. There is no safe in the guest room. The TV is a very old 21 inch spherical picture tube. The big bed is very c…
1. My friend and I came to Xiamen for a visit. I heard that this hotel is in the center of the municipal government and the transportation is very convenient, so we chose to stay in this hotel. It only takes about 20 minutes to take a taxi directly from the airport to the store door. When we got off the bus, the manager on duty immediately came to help us with our luggage. Later, when he learned …
1. This is my first time to stay in this hotel. Because it is a flight in the evening and the temperature difference of the weather, I have some colds and diarrhea. I was worried about my heart, but the manager of the housekeeping department found out about this and came to condole and give fruits as gifts. At 12:30 in the morning, the manager on duty also informed the manager of the western rest…
1, "The location of the hotel is good. Facing the Dandang Lake, we stayed in Room 01, which has two windows. You can see the lake while watching the sea. Especially the night view of the Dandang Lake, which is very beautiful. The facilities in the room are somewhat old. After all, it was opened in 1999, but there are free fruits and free mineral water in the room. The LED electronic screen at the…
1. The front desk of the hotel is very considerate, fast and efficient, and the service attitude is also good, with a five-star standard! I want to praise you here!
1, "The hotel is located in a very downtown area, and the rooms are also good. There is a Fushan Park nearby. There are not many kinds of breakfast."
1. The overall feeling is quite good. The software and hardware have all reached the 4-star standard. It's just that there is a little smell in the room.
1,1. The front desk service in the lobby is fast and efficient. 2. The air in the guestroom floor and the room is poor, and the ventilation is poor. 3. The room is clean, but the furnishings and configuration are too simple. 4. The variety of breakfast in the restaurant on the third floor is acceptable, the service lacks training, and the standard is two stars. 5. The restaurant on the second flo…
1. The hotel room is not bad, and the big bed is very comfortable. Sleep soundly at night. The hotel environment is less than the four-star standard, but higher than the three-star standard. Very good location, moderate price.
1. The hotel is not the latest, but the rooms and service are very good. Because of the geographical location, it is not as convenient to take a taxi as the hotels on the street. The hotel attendants and doormen are very friendly and meticulous, and they introduce the most appropriate travel methods and routes to customers. I feel it is very good.
1. It's a very ordinary four-star hotel. The environment is good. The room is really not good. The service is OK
1. I stayed in the garden view double room in the main building from June 5 to 6. I was very satisfied with the hotel. The facilities are relatively new. The room is large enough, the layout is good, the lobby is magnificent, and the service is good. Outside the hotel is the Bailuzhou Scenic Area. Once you leave the hotel, you can see the lake. It is very comfortable, and the location is not wron…
1, "The location is good. However, the attached building is different from the main building of the Bailuzhou Hotel. It used to be called the Mining Building. Now it is a joint venture with the Bailuzhou Hotel. The room is relatively large, but the decoration is relatively old. The door of the room just opened has a little musty smell. Fortunately, I just slept there for 5 or 6 hours. The only ad…
1. This can also be called a four-star hotel? Not worth it. It's just that the location is convenient.
1. The view of the lake view room is very good! The hotel is also very clean, but the facilities are a little old. The traffic is very convenient! Taxis in Xiamen are too expensive. It's convenient to take a bus from the hotel to the scenic spots. However, the breakfast in the hotel is very ordinary, with few choices and is repeated almost every day.
1, "The hotel has a high cost performance ratio. I especially want to thank the waiter of the breakfast restaurant. On the morning of August 2, I finished my breakfast and left the small bag on the chair, and soon the waiter sent the bag to the front desk. Thank you very much! I want to praise you. When I meet the waiter in the corridor, they always greet you with a smile. In general, I am very s…
1. The service attitude was quite good. I was willing to listen to the customer's suggestions. The room facilities at 290 yuan were OK, the room space was a little small, and the breakfast was quite average. According to the principle, the four-star level should be better, and other four-star levels have also stayed,
1. As an old four-star hotel, the room is still very tidy and very good. The airport pickup service is very good. You can check in on the bus to save time.
1. Very good hotel: The waiters are polite, generous and kind. Check in procedures were completed on the way to the airport; When checking in again, the night bed was made in advance and the room temperature was adjusted, which is called pre service. The quality of the catering was also good. Recommend to members!
1. Our flight from Beijing to Hohhot was delayed for more than an hour, and it was already more than one o'clock at midnight when we arrived in Hohhot. The hotel specially sent a car to the airport to meet our two ordinary guests. Get on the bus and check in. You can enter the room directly at the hotel. Good! The room is clean and tidy, with perfect facilities and star service. I didn't choose w…
1. The service was very good. Press the button in the service center to put forward your own needs, and someone will respond soon. Disadvantages: the room is a little small, and the house is a little old
1, "The room has free broadband, which is very fast. The hotel is very close to the General's Office. Those who want to visit for a short time can choose here."
1, "The hotel is an Air China hotel, and you can accumulate Air China mileage when you check in. This is good. There are many kinds of hotels in the morning, and you are recommended to check in."
1. Hotel room
1. Pengnian Hotel is too busy to park, and the room smells strange, especially after leaving Hilton.
1. The hotel room is fairly good, worthy of the five-star title. Breakfast varieties are also rich. The hotel is close to the main road. The floor is too low and it is noisy to sleep at night.
1. The room is spacious, and there is a big gap between the lobby and 5-star. The speed of elevators is fast, especially to high-rise buildings.
1, "There are so many Japanese people. The layout of the rooms in the old hotels is OK, but the carpets are too smelly, the room air is not good, and the windows are not easy to open. The service is OK, the transportation is convenient, and it is very convenient to go to the railway station, the fast track, and the scenic spots, but the environment near the railway station is quite chaotic. The r…
1. The room facilities are relatively old, the air conditioner is also loud, and the swimming pool charges for the guests in the senior room, which is as high as the outside charges. I find it difficult to accept that the water in the swimming pool is too deep. I told the waiter in the swimming pool that no one paid for breakfast
1. The hotel service is good, and the environment is also quite good! In particular, it seems that the revolving restaurant on the 48th floor is full of features. At least I am satisfied with this hotel!
1. The service was OK, the room was good, 88888888888888888888
1. As a five-star hotel, the facilities are outdated, and the room area obviously does not meet the five-star standard. The speed of hotel checkin is extremely slow. Arrived at about 11:00 pm and waited for 15 minutes. The room price is too expensive. Apart from the good location, it can't reach the level of a five-star hotel. The price of breakfast is OK according to ctrip. The bathroom in the r…
1. I came to live again last Tuesday. This time I stayed in a big bed room. One of the biggest problems was that I was given a room with a strong decoration taste. After I entered, my nose was very uncomfortable. It was slightly better after I opened the window for about half an hour. I didn't tell the customer about the recent decoration. Could you not give a room with decoration taste in the fu…
1. Check in again after a week. This time, we booked a business king size room. It seems that the original luxury king size room could not be booked. There are more fax machines in the business room, more bathtubs in the bathroom and a large window on the wall. The room looks small, and the price is acceptable if it is 100 yuan higher. However, I still think that the luxury room is practical and …
1. Behind the Jinfuyin Street, it should be reconstructed from residential buildings. Last month, I went to live in a standard room. When I went there, the standard room didn't have a big bed. It was upgraded to a deluxe room. A closer look showed that it was a 2-bedroom room. The room is very old, but it is very clean. There is a computer in the first room for Internet access. The service staff …
1. Overall, I think it's pretty good. I will stay here next time. I forgot which floor is the hotpot, so I recommend it
1. The facilities are a little old, but after all, they are a quiet place in the middle of trouble! The things used for washing and gargling are quite complete!
1, "Hehe, after all, it is the best hotel in the local area, so in addition to the facilities"
1. The room is well decorated and clean, the environment is good, and the water in the swimming pool is clean, which is suitable for holidays.
1. Generally speaking, it is good. According to the price in the national conditions, it is still a hotel with high cost performance. However, if you don't have a car, you are not recommended to stay in this hotel. We asked about the past all the way. Road signs are fairly good. The customized garden view room faces the swimming pool. Although I arrived late, I went for a short swim. I feel good.…
1. For the second time, the 398 yuan room in Beijing is very good. There is no place to have breakfast. Breakfast in the hotel is more than 100, so I can't afford it. The single room is very small, just for one or two nights. The room is very clean.
1. I ordered a large bed room with a price of 430 yuan. The room size and facilities are both good. It's very practical to only set up a shower room in the bathroom, which I admire. Breakfast is also good, both Chinese and Western can be considered. Disadvantages: The hotel restaurant closes at 8pm. In order to urge the guests who are still eating, the lights are turned off half. It makes people …
1. The room is a little small. The 398 yuan deluxe room is very clean. In Beijing, it is cost-effective, but there is no breakfast. There are few places to eat around. The single room is very small, the single bed is placed against the wall, and the other is generally 450mm wide. Towels and bath towels look clean.
1. Due to the new decoration in 2007, there may be some new problems that haven't been solved yet. I often have to live there because of work needs, so I cautiously put forward the following suggestions: 1. After the new decoration, the shower head in the shower room of a single room is too high. I changed the room, which is still the same. It's hard to use. 2. After the new opening, some managem…
1. It's a good hotel. I will go there again! Convenient transportation, good service, very good
1. I think the hotel is very good, the room is very clean, and some bathroom facilities are also good, very considerate. It's a good hotel. The price is acceptable through Ctrip. I will recommend a friend to stay.
1, "I have lived three times in two months. Of course, the transportation is very convenient."
1. I have checked in for the second time. The boss is very satisfied with the hotel. Otherwise, I would not have booked
1. The boss has to book this hotel every time he goes to Beijing on business. He is very satisfied with it
1. The hotel felt very good. The details were quite considerate. The room price was a little expensive. The standard room for two people was a little small.
1. The new style is quite exquisite, which covers the inherent shortage of the small room, but some details are still not thorough. For example, the electric kettle for boiling water has a strong plastic smell, which may be an unqualified product
1, "The room facilities are a little old. It is gratifying to know that the broadband speed is fairly good. The hotel feedback on January 14, 2008: Thank you for your recognition of our broadband, and we will work hard in other aspects. Welcome to visit again!"
On the small holiday of May 1, I stayed in Huzhou International Hotel. I felt that it was good and cost-effective. Especially in the busiest shopping area in Huzhou, I could enjoy the holiday style of citizens in small cities during the May Day holiday, and I could also choose the special silk and brush in Huzhou. Because it was a franchise store next to the hotel. I often visit green mountains a…
1, "The service is OK, the room size is moderate, but the clothing and facilities are quite old. The hotel feedback: January 14, 2008: Thank you for your recognition of our service, and we will work hard in other aspects. Welcome to visit again!"
1, "The service was very careful. Although the room was old, the supplies were very clean. The waiter was very qualified. He picked up the wallet and tried to give it back to me. I am very grateful."
I stayed in Heilongjiang for one night in early October. All my comments were based on the local conditions in Qiqihar. I don't think I can compare them with the same level hotels in Beijing, Shanghai and other big cities. The surrounding environment is pretty good. There are basically taxis waiting downstairs. There are also shopping malls and supermarkets nearby. The service was very good, proa…
1. Overall, I think it's good. The standard room of 191 yuan/room is worth the money.
1. It is very close to the railway station and long-distance bus station, and the starting price is within five minutes. There is a McDonald's that operates 24 hours downstairs (food can be delivered to the room free of charge). The Plain Mall is on the left of the gate, and the theater is opposite.
1. The sound insulation is poor. People outside the room speak clearly. Everything else is OK. I dare to ask for anything in Ganzhou
1, "The appearance is old, the parking lot is small and messy, and there is an extra charge, but the hotel is clean."
1, "The absolute downtown location is opposite to DXL, and next to it is Wang Yipin Head Office, which sells the best Hubi. The most lively Hongqi Road is 5 minutes' walk, and the luxury double room is reserved, because"
1. The basic facilities were OK, the service was friendly. Breakfast is ordinary, but it has Jiangxi characteristics. The problem I feel is that the sound insulation effect of walls and doors is not very good.
1. The hotel facilities are ordinary, but the sheets and towels are white and clean, and the service is warm. Maybe the hotel was built in the early years, and the underground garage has no direct access to the lobby, which is inconvenient. The food is good for those who like spicy food. It would be better to add some non spicy dishes if you could give consideration to the tourists from all over …
1, "I ordered the VIP building standard room (selected according to the comments of predecessors). The biggest feature is that the service details are very considerate. Fruit, evening papers, napkin boxes, and even the foot towels in front of the bathtub have been paved. Special note: because the VIP building standard room of the hotel is close to the road, the rooms are divided into double layer…
1. It's a very ordinary hotel. I can't make a reservation for Gandian. Let's just settle in
1. Advantages: The room conditions are simple, the atmosphere is warm, the accommodation environment is quiet, the price is reasonable, and the service attitude is good; Disadvantages: The windows are almost as high as the rear roof, and there is no anti-theft window (net), so the sense of security is not high.
1. The lobby is not very good, but the room is very comfortable. The most satisfied place is the assistant manager and customer service personnel in the lobby of the hotel, who can complete the customer's requirements in a timely manner and do their best. It makes people feel at home. I would like to thank them.
1, OK... The comb in the room is very good. I always use it at home now.. Next time I have to check in and take the free comb home.. Ha ha ha ha ha ha ha... The location is not good. It's very quiet. It's quite easy to call a taxi, but there is basically no food around. I ate a bowl of tomato and egg noodles in the restaurant on the first floor... Not bad..
1, "It's hard to find this hotel in the early morning on rainy nights, and the apartment building is also hard to find. Although the rooms are crowded, they are also fully functional. I feel that the airport shuttle service of the hotel is very good, although I was awakened several times along the way! Hehe"
1. The hotel is at the entrance of the development zone, which is just a business trip. So I felt it was very convenient. The heating in the room is fully turned on, so the temperature of - 15 ℃ is not cold. The quality of the rooms is fairly good. It's very satisfying to have such hotels in the development zone. The quality of breakfast needs to be improved. It's cheap, but there's really nothin…
1, "The room and environment in Changchun are not bad, but the temperature is below zero now, and the air conditioner in the room has not been heated yet. I woke up several times at night and caught a cold."
1. The environment is good. The transportation is also convenient. Very good service. I'll think about it next time
1. The service provided by the hotel staff is good, the location is superior, and the breakfast is also very good. However, the internal facilities of the hotel rooms are relatively old, and the housing area is also small. Compared with the newly-built economic hotels, the hotel has little advantage, which does not reflect the four-star level. At present, the surrounding areas are under demolitio…
1. After several comparisons between accommodation in Baoding and other hotels, it is found that BOC Tower should be the best hotel in Baoding. Anyway, I just need to go to Baoding. Now this is my base area. It is better than the so-called five-star hotel Xiulan Hotel.
1. The front desk service attitude of BOC Building is very good. They helped me solve the reservation problem in a timely manner. I am very satisfied that the best hotel in Baoding City is BOC, with a four-star standard. In Baoding, you can live in the Bank of China Building. There is no other choice
1, "The price of a single room is worth more. The breakfast is good. The service is also good. It's very humanistic. Hehe, the first time I met a hotel with flower petals in the toilet. However, the hotel's bath center and beauty salon can't be used in the decoration. They didn't mention it when booking."
1. Good service, quick checkout, good taxis at the door. Most importantly, breakfast is really good. The price of single room is reasonable, but the standard room is not suitable for one person.
1. Live here every time! Especially the restaurant, which makes people linger:)
1. I only stayed in a single room for one day. I feel satisfied. The service was good, the breakfast was good, and the checkout was fast. I went to Xiguan people not far away for dinner. The donkey meat pot is cheap and affordable. The room is a little small, and the computer on the desk is a little crowded.
1, "In Baoding, it should be said that it is the best hotel, and the restaurants there give the hotel a lot of points."
1. The decoration is good. They are all new. The service was extremely good, very attentive. In Baoding, I was most impressed by BOC's service. Then the breakfast is a buffet, with many kinds and good quality. The traffic around the hotel is also very convenient. Baoding Municipal Government is opposite the hotel.
1, "I live in No. 7 Building, and my general comment on it is: there are many trees, few people, long roads, short buildings, old rooms, and slow internet access. I don't know how about the main building, but I feel it is worthwhile to come here to experience it, but I won't live here next time. By the way, the service is really good. Before I went out, my pants suddenly opened, and I was eager t…
1. I have been away from the hotel for almost a month, but I still want to say something: it was very late when I arrived, I had dinner in the restaurant in the hotel, and asked if I could have breakfast at five o'clock the next day. The waiter politely told me that although the restaurant was not open at that time, they could arrange to deliver the meal to the room. At 5:35 the next morning, the…
1. The environment is very good and I feel very safe to live in. I live in Room 28204 of the main building. The attitude of the room service staff, the receptionist and the doorman is very good. The drawback is that the breakfast is average. Sometimes the service staff in the breakfast department sit down to eat before the guests finish eating, which needs improvement. In addition, taking a taxi …
1, "The environmental facilities are quite good, especially the security guards at the entrance are very safe, which is worthy of being a national hotel in Jilin Province. I live in the main building, but the corresponding price is relatively high. Personally, I think the difference between the main building and the seven buildings is not big. In fact, in the south, it is also a three-star standa…
The rooms in Building 1 and Building 7 are very good, although they may not be better than other higher class rooms. The quality of service provided by the service staff was very good, and at least the best service was provided when I came to Changchun several times. The environment around the hotel is very good and quiet. In other seasons, you may feel the singing of birds and the fragrance of f…
1. It is indeed a state guesthouse, with a deep courtyard. There is a guard post at the entrance. There is a guard post inside. Most people dare not approach it. It is just that the courtyard is too deep (you have to walk a long way into the building). It is inconvenient not to drive by yourself. The house is good (although only seven are cheap), and there are two bottles of free mineral water - …
1. The location is very good. There are supermarkets near Zhongshan Square and Zhuozhan Square, but the hotel rooms are small, the facilities are old, and the breakfast is good.
1. The overall standard is not up to five stars, and the work efficiency of the front desk is relatively slow. The location is not bad. It's easy to find. The morning tea in the hotel is not bad. Supplementary comments May 26, 2008: Wrong, 4-star
1, "The hotel facilities are a little old, but clean and tidy. The breakfast starts at 6:00 (very good). There are many kinds of food, but it's a pity that the food of the Ming Dynasty can't be eaten at 6:00."
1, "The room is too old, the service is OK, after all, the hotel industry in Changchun is not very advanced"
1. The first time I stayed in the hotel, it was pretty good on the whole. The room was upgraded. The room felt very warm
1. The hotel is on Renmin Street, and I am satisfied with all aspects. However, there should be more and better choices at the same price in Changchun, and the hotel's cost performance is not high.
1, "The front desk room service attitude is good! Breakfast is also very rich, and the room price is clean enough. Keep up the good work! Chinese hotels have fewer non-smoking rooms, or putting ashtrays in drawers is non-smoking. Do 75% non-smokers like us need to put up with 25% more smokers? I hope that Chinese hotels can learn from foreign companies. Please set up more non-smoking floors. Than…
1. The environment and traffic are good. The room is OK. I will come again next time
1. It's a good hotel with new facilities and convenient transportation, but it's a little far from the city center and it's convenient to go to the airport.
1. On the whole, I think there are four stars at most, but not five stars at all. In particular, the food in the western restaurant on the second floor is really not flattering. It is not like western food at all. The taste needs to be improved and the variety is few. The environment is a bit chaotic, the only advantage may be cheap.
1, "The breakfast is good, the bathroom is good. The room is fairly large. The location is 22 yuan from Yuhuatai."
1, "Thanks very much to the customer service personnel with Ctrip ID 84392, who helped to properly solve the problem of the customer's credit card guarantee. They didn't inform the customer in time. They will visit our hotel again next time they have the opportunity to support Ctrip."
I stayed overnight in early April 2008. Overall, I felt it was pretty good, especially on the side facing Zhongshan. Next door is the Nanjing Museum, and there are many good things to see. The Huaiyang restaurant downstairs is a little expensive, and the food is average. I also want to say that I have been to Nanjing several times, and I feel so good! Supplementary comments: April 27, 2008: Remem…
1. The service is generally very good. It is convenient to get the service through the room phone, and the price is competitive. One regret: it is not very convenient to take a taxi at the hotel; At the same time, the hotel cancelled the airport bus, which made it inconvenient for guests.
1. A very good hotel. Although it is in the railway station, it is quiet. The room is clean and the breakfast is average.
1. The location is very good. It is very close to Yantai Mountain, East Fort and Changyu Wine Museum. The seaside pedestrian street is very beautiful, and the music fountain is also good. Disadvantages: The fan coil unit of central air conditioner in commercial standard room (6601) is poorly insulated, which leads to condensation and mildew; In addition, the slippers provided for free are extreme…
1. The first feeling is that the doorman service is of a high standard, and the front desk service is also smiling. The room is spacious and bright, and the Internet is fast. Very satisfied with a hotel!
1. I live in a single room. The room is a little small, but the facilities are quite complete. The location of the hotel was quite satisfactory, and the level of service was fairly good.
1, "I just came back from Nanjing yesterday. After repeated comparison before I went, I picked Jingli and felt that whether it was the doorman, the receptionist or the waiter in the restaurant had been well trained. The doorman uncle also carefully introduced how to take the bus in the Confucius Temple (because it was the rush hour of work, it was difficult to get a taxi). The business single roo…
1. The facilities are not new, but they are very warm, the location is very good, and the sanitation is also good
1. This is the third review, purely for the purpose of getting points. Nothing more to say, the service was pretty good.
I stayed in this hotel on June 2, 2006, and Jingli's service is still very good. It is very rare to give customers trust when checking out. Unlike most hotels, they still need to send someone to check after asking whether they have used the charging items. I read the description of the doorman uncle in the previous comments, and paid attention to the special case. It really deserves the reputatio…
1. Good hotel. I always like it. But now the hotel needs to improve: 1. Breakfast. I have stayed in this hotel for N times, but the breakfast is the same every time. Now I can remember the position of each plate. 2. Compared with the current market, the single business room is still small, which will affect the subsequent stay.
1. Although the room is small, it has complete facilities. Very good service. I always stay in this hotel.
1. Only very good! Super cost-effective! The decoration and location of the hotel are excellent. The ancillary facilities are also complete and the service is very considerate. I couldn't help but change my schedule and stay a few more days. Although it is a little far from downtown, the environment of Zhongshan Tomb is really unspeakable! The only disadvantage is that the window was not opened f…
1. The so-called mountain view room is just a non sea view room. There is no mountain view to speak of. The sea view room does have a view, and you can choose it if you can. But the curtain of this kind of room is not tightly drawn, and the light coming in in the morning is like a light on, which may cause early awakening. In addition, the sound insulation outside the window is poor. If the wind …
1. The location of the hotel is very good. It is close to the Plum Blossom Mountain in Zhongshan Mausoleum. However, the house price is not in direct proportion to the price. The lobby is luxurious but desolate; The room at 528 is very clean, the service is also good, but the facilities are a little old. For example, the toilet cover is an old plastic cover, and the chairs in the room are also ve…
1. In Zhongshan Mausoleum, it was very quiet. There was no noise when I slept at night. The breakfast was OK, and the service was OK too
1, "Overall, it's OK. The environment and air around the scenic spot are good, but when we went there, we were still rebuilding (it seems that the expansion took so long last year) The environment was discounted. The top of the third floor of Lijing Building where we live seems to be Room 319. I don't know what machine room the window is. There is a buzzing noise, which affects the rest. I change…
1. The service is very good, the environment is also very good, very comfortable, and the restaurant is also very comfortable, very warm.
1. The location of the hotel is very good. It feels like a paradise. It is especially recommended to take a walk in the Ming Xiaoling Tomb next door before 7:00 a.m. (because the ticket is free of 70 yuan). The air quality and surrounding environment are much better than Zhongshan Tomb the day before yesterday. At that time, the reservation was made because the hotel was a four-star hotel and the…
1, "The hotel is relatively new, the service is good, there is a small convenience store nearby, but the room price is expensive.."
1. Sheraton Hotel is really good. It is a standard five-star hotel. Because of my work, I often check in at 22pm. Sheraton accepts the customer's credit card guarantee and keeps the room. very nice! Sheraton is in a good location, just north of Tianfu Square, absolutely downtown. There is a stadium next to it. There are few shopping places around, so you must go to People's Square or Chunxi Road …
1. Sheraton Tianfu Lido Hotel is good. The price is quite affordable. The hardware is definitely up to the five-star standard. The environment was also very good. The service was of a very high standard. I checked in once in March 2007. The people who check luggage are very friendly and close to the People's Square, which is definitely a prime location. The road at the gate is a one-way line, whi…
1. Generally speaking, it is a good hotel!! But there are some small details to be noted, the board at the computer broadband connection has broken, and the bottom ash of the pot was found in the egg cake after breakfast delivery.. After negotiation, the store immediately called to apologize (very satisfied with this, but hope that this kind of event will not happen again in the next stay)!! Next…
1, "The Spring Festival Hotel has a special price. We immediately withdrew" Home Like "and switched to Sheraton. The high-end room is only three-star standard, which is too small. The luxury room looks like a five-star room. I don't know how the five-star room standard is set. The bed and bedding are" Sheraton " "The characteristics of down pillows are still so comfortable!! In terms of service, …
1. The room and front desk services were OK, but there was a problem with the cashier. I had a little phone charge and told her that it would take a long time to open it like this, but not like that. Finally, it was all opened in the name of the room charge, which was convenient for her, not for me. In addition, at more than 8 o'clock in the morning, the vacuum gas in the corridor started to shou…
1. During the Spring Festival, the price performance ratio is high, which is not bad, but I don't know how much it usually costs. It is well-known in Chengdu, and it has a good face to live in. But the room is too small, and it looks old, which may have something to do with the original design. It is not very convenient to have a one-way street at the door. If the price is still so pleasant, I wi…
1. The house is not bad, and the location is not bad, but it is not worth the price. At the same level, Huating Hotel in Xuhui District is only 600 yuan, but it costs 1000 yuan here.
1. A very good hotel. It is very convenient in terms of service, facilities, transportation and location. Many guests will be assigned to this hotel
1. The rooms on the executive floor at the same price can vary from large to small, which should be noted. The bathroom is decorated and arranged very comfortably and beautifully, with shower, bathtub and light transmitting windows. The interior of the room was quite large, the service was quite good! Overall, I felt it was pretty good. Many foreigners live here.
1,1. Convenient transportation, close to the subway station; 2. Quiet, clean and comfortable; 3. The price is expensive (room price, catering, Internet access).
1. The hotel has a good location and complete facilities; The price is high, parking is not very convenient and charges are high.
1. "Internet charges are too expensive, 40 yuan per day. The transportation is still very convenient, and it is very close to the subway station."
1. Telephone reservation for check-in from the first day of the Spring Festival to the fourth day of the Spring Festival. The standard room is 338 yuan, including double breakfast. Go to the hotel at 11:00 on the first day of the new year, and upgrade to business room for free because the room is full. The room is clean. Near the subway station. I only took a taxi once. It costs 13 yuan to take a…
1. The overall feeling is fairly good, very quiet, and the room is also good. Near the Ethnic Village and Haigeng Park, you can go to the Dianchi Lake to sit at night and listen to the tides. It's very enjoyable. The only bad thing is that it's not convenient to take a taxi at night, but the front desk is also prepared to help you call a taxi. Just say it in advance.
1. "The family room was booked in Hongkou Business Hotel. Because the order was changed temporarily after arrival, I was a little unhappy with the receptionist, but the room service and the value of the room after check-in greatly made up for the previous unhappiness. On the whole, it was very good."
1. The exterior wall of the hotel is being decorated, and the entrance is very small. After entering the door, it is G floor, and then take the elevator to the first floor Check in. The room in the hotel is very small. After entering the door, there is a straight single aisle. Two single beds close to the wall are on the left side after walking two steps inside. There is a single aisle in the mid…
1. Although the hotel is small, it is very warm. The plane arrived at 12 o'clock late at night, and you could see it when you got off at Nanjing Road. It is not difficult to imagine. In particular, the transportation is very convenient. The subway is the only way out, and the temple street is the only way to go. It's great to live in such a place at this price. I will stay again when I have the c…
1. The transportation is convenient and the surrounding area is busy. It is natural that the room is small in Hong Kong. In general, it is worth the money.
1. The transportation is very convenient. The room is a little small, but it is clean and tidy. It has the characteristics of Hong Kong. It is cost-effective. Please recommend it
1. The room is OK, but it's a little old. There is no yogurt for breakfast.
1. The room is very comfortable. The overall design and environment of the hotel are very good. The front desk service was also very friendly
1. In Linyi, this hotel is of high quality, and the service provided to foreign guests is also quite qualified. Unfortunately, TV content is relatively monotonous, and there are few foreign channels. Very good service attitude.
1. The hotel facilities are relatively old. 2. Breakfast is still at a high level. 3. It is near the hospital. 4. If conditions permit, you can stay in the adjacent intercontinental hotel under the same group
1. Although I live in a luxury room, the facilities in the room still look old. The breakfast is not very rich, but I think I'm asking too much for the 50 yuan breakfast in the four-star hotel. However, the front of this hotel is very impressive. Hidden in a small alley. Fortunately, taxi drivers all know.
1, "After staying for three days, I felt that the service was fairly good, and the buffet in the evening was pretty good."
1. Next to Honghongkou Hotel in Yantai, there are Hongkou Hotel and Hongkou Business Hotel. Hongkou Hotel is the best of the three. I stayed in Hongkou Hotel Mianhiao Room (400) and two Mianhiao Business Rooms (430), which are clean, beautiful and facing the sea. The only drawback is that it seems that it has just been decorated (as evidenced by a bag of bamboo charcoal in the room), and it taste…
1, "The appearance is too small and the room is too small, even taxi drivers are unfamiliar with it, so it needs to be improved"
1, "1. The front desk is very polite and can quickly respond to customers' reasonable requirements. 2. A good hotel. 3. Will recommend to friends."
1. The hotel is not bad. The room is not big, but it is quite comfortable. There are only Starbucks and KFC under the hotel. It's a little far from the New World to eat.
1. I went on a business trip to Beijing with my colleagues. After consulting in advance, I chose the Zhongchuan Hotel and booked two rooms on Ctrip from May 17 to 20. The plane was 3 hours late on that day. I was afraid that I could not stay in the hotel as scheduled, so I called the hotel reception after arriving in Beijing and asked for room reservation. The front desk waiter replied warmly tha…
1. I stayed in Hongkou Business Hotel, which is opposite to Hongkou Big Wine Restaurant. Compared with Hongkou Big Wine Restaurant, the appearance is quite different. The lobby of the hotel is also small, but I found it very good after checking in. Advantages: The price is suitable for young people or home travel, and the cost performance is relatively high. The bedroom and bathroom are clean and…
1. It's the third time to stay in the Zhongchuan Hotel, which has almost become a designated place for me to stay in Beijing. The room layout is simple and clean. Although the bathroom is not big, it is also very clean. I really like the stairs with wooden handrails. I feel very casual when I walk around the room. The slideway of the curtain was very smooth during the last check in; The shower in…
1. It is convenient for traffic, affordable, and the service is basically in place. Although the room facilities are a little shabby, they are worth recommending.
1, "The price is good, the location is not particularly easy to find, but the information provided by the front desk of the hotel is very accurate, and it was quickly found by car. A single room can only accommodate one person, but the conditions are good, so it is recommended that one person can stay on business trips."
1. The room is very clean. The room facing south is very comfortable when the sun shines. Now you can access the Internet. The Internet speed is also good. The transportation of the hotel is always convenient. It is a quiet place in the middle of a noisy area. I always like the snacks of Huguo Temple on Yuetan North Street. It's also good to have lunch and dinner for 10 yuan in the hotel. The dis…
1, "The single room is a little small, but it is basically enough. There is broadband Internet access, but the Internet speed is slow. The room in the south is quiet, and the sound of vehicles passing by at night in the north of the west end. There is a" massage "call at 6:00 in the morning, ^ _ ^; if you don't want to be disturbed, unplug the phone plug. Additional comments: July 31, 2007: credi…
1. The location of the hotel is very good, and the quality of the rooms is also very good. The only thing is that there is a little less parking space, and parking is a little tight. However, it is understandable that it is located in the center of Nanjing.
1, "The location is good, in the city center. The hotel has good service and a wide variety of breakfast. I am satisfied with the broadband speed of the computer in the business digital room, and the room is clean, close to the snack street on Hunan Road."
1. The hotel is conveniently located in the city center. The hotel provides good service, and the breakfast is rich and delicious. The computer speed and broadband speed of the business digital room I live in are satisfactory. I will live here in Nanjing in the future.
1. It's better to stay in an old hotel. The environment is very good and the service is also good. I left my wallet in the hotel accidentally during the Spring Festival. After checking out, I received a call from the hotel and finally returned to the hotel. I felt very good! You must stay there when you go there
1. The price is not very good. Everything else is pretty good
1. The boss once took us here to play bowling and eat when we were studying at school. The environment is good and the room is very comfortable. It is a high-end hotel in Minhang District
1. The hotel has a southern European style: small white door, cream wall, iron wall lamp, rattan furniture, and the shutter door of the bathroom can be opened to see the scenery outside the balcony. The wind gently blows the white curtain leading to the terrace, which is a copy of Love Letter. The lighting and air conditioning are all automatic induction type, which is very advanced. There are fe…
1. Overall, I felt that the room facilities were very old, and the walls and carpets were very dirty, And there are many scratches and holes, but it seems that the whole building in Guiyang is very shabby, the bathroom is very clean, the towels and toiletries are very complete, the TV stations are many, the rooms are arranged in an orderly way, and there are few rooms with internet, and there are…
1. This trip was on the day of the black rainstorm warning in Hong Kong. I wanted to cancel it, but I called Ctrip to cancel it. After communicating with the hotel, Ctrip said no, so I had to go in the rain. It turned out that there was no rain in our activity area. When I went to the hotel, I told the front desk that it should be high, but it was arranged on the 27th floor. I was very worried th…
1. The room is small but clean. It takes a long time to go through the formalities when checking in, but it is very fast when checking out. Overall, basically satisfied
1. I originally wanted to book Weilanxuan or Bay View International Hotel, but there was no room, so I chose Polly. Fortunately, it didn't disappoint me. When I booked, I only had a deluxe room. The price of HKD791/day was relatively cheap in Hong Kong. I stayed with JF for two days. The hotel is not that difficult to find. Although we asked several Hong Kong people in Causeway Bay, they did not …
1. High cost performance, good service, delayed check-out if you have a room, which is very beneficial for tourists leaving by night flight. I just hope that the breakfast charge can be the same as that of CTRIP. The 80 yuan buffet is still attractive. In addition, taking a taxi to Guangzhou Kowloon East Railway is too expensive, so I suggest taking the subway to Jinzhong
1. I suddenly had to go to Hong Kong to do something urgent. I ordered a 4-day holiday through Ctrip. It was really convenient. I didn't buy an Octopus card. It's enough to get a free 24-hour subway ticket from Ctrip. Rosedale is in a good location. Although the hotel room is small, the room is high, and the design is reasonable and practical. It is clean. Everything that needs to be prepared has…
1. It can't be said that there is no problem, but all the staff of the hotel are giving every guest as much service as possible with a great enthusiasm, so I am willing to give the highest evaluation to this hotel.
1. On the afternoon of the 17th, we came to the downtown area from the Disney Hollywood Hotel to check in this hotel. The hotel is in a alley, and it is not easy to find the hotel that has never been here. Handling was very fast and the attitude was also very good. It took about 5 minutes to complete. When we arrived at the room, we felt a little uncomfortable because it was really small, especia…
1. The location of the hotel is very good. It is convenient to go to the railway station, airport and shopping. Facilities are also very good. The price in this position is really good. If there is not a construction site nearby, it should be quiet. The attitude of the waiter was also very good, but when checking out, because I don't know who wrote a line of less than 2cm on the inside page of th…
1. The room condition is quite good. It is basically the same as the 5-star hotel I stayed in Nanjing. The service attitude and hotel environment are quite satisfactory. The only problem is that it took nearly 40 minutes to check the room when I checked out. I don't know what it took them so long to check
1. "The hotel has good service and superior location, but most taxis don't know how to get there."
1, "The old hotel is still reliable, and you can consider it next time you stay here. The hotel feedback: July 31, 2008: Dear guests: Hello! Thank you for choosing to stay in Xinjiang Tunhe Ramada Hotel and your comments on the hotel. We apologize for your dissatisfaction with your stay in the hotel in the early stage. The hotel has undergone a new transformation in May 2008, including the decora…
1. The first room is on the ground floor, with the window facing the bar. I asked the front desk to change a room. The front desk has a good attitude. On the third floor, the windows are usually blocked by the building in front of which should be the corridor, and the other half faces the roof of the bar. The room is small, the software should be up to three-star level, and the hardware is slight…
1, "The location is good, the room is small but clean, suitable for business activities."
1. All aspects are good, but the room and bathroom are small. Clean and tidy, with good sound insulation effect.
1. The environment of the standard room is not very good. The floor is low and there are mosquitoes. Business room is OK, big bed room 1
1, "The lobby of the hotel is too small and the decoration is old. The attitude of the service staff is not good. Finally, I found a foreign waiter to check in, which is better than the service ecology in China. Overall, it doesn't look like a five-star hotel, but rather like a four-star hotel. Two talents give me a chocolate. Alas, it's not so stingy. After the middle waiter cleaned the room, he…
1, "This hotel is very suitable for self driving tours. We live on the top floor of Building 2. The scenery and service are very good. Next time we go to Weihai, we will stay in this hotel!"
1. The special price for staying in a suite during the Spring Festival includes breakfast/dinner. The service is of a very high standard, just because the hotel is a little old, but the facilities are pretty good! However, we hope that the hotel can normalize the special price for the Spring Festival weekend, which will attract most tourists!
1. The big bed room is very good. The swimming pool and free long-distance telephone are the most recommended. The disadvantage is that the lobby is too small and the taxi at the entrance must cost more if you want to go to the airport. When you come from the airport, it costs only 74 yuan. When you go to the airport, it costs 100 yuan. There is no time to argue with him
1, Corner of the Earth - Although it's not expensive to go anywhere by taxi, but it's too cold to walk in the village or in the shop, but it's still convenient to eat in the morning. The guest rooms are very poor. It seems that the later transformation is not as shiny as the intercontinental in Beijing. This is dark and cold. The room friend who arranged to face the north took a bath first said t…
1. The price of Intercontinental Hotels and Ctrip is really competitive. It should be the cheapest five-star hotel in Shenyang. 1) Location: It is located near Taiyuan Street, a commercial street. The traffic is convenient, but there is always a traffic jam at the entrance. If you want to take a taxi, you should get off the hotel and cross the road. 2) Room: It's very small, but it has a good str…
1. "The hot water system and bathroom drainage system are poor. It is difficult to adjust the water cooling and heating. It is either too cold or too hot. After taking a bath, the bathroom is full of water. Other things are OK. The geographical location is very good, and the house price is attractive."
1, "Take the quiet from the noisy. Although the facilities are a little old, the view of the room facing the Huangpu River is very good. The only bath water temperature is still hot and cold. Please check again. This problem is serious, especially when children take a bath. The service is very good. The hotel reported on April 16, 2008: First of all, thank you for your affirmation of the hotel's …
1. I originally booked two suites online. After checking in, Ctrip called me to ask if I had only checked in one room, and I had to deduct the money from my credit card. I wonder how the hotel connects with Ctrip? Hotel feedback: December 7, 2007: We are very grateful for your message, and very sorry for the confusion caused by some small misunderstandings. According to our guarantee reservation …
1. Due to the location, it is not easy to get a taxi at some time. Of course, it is not the hotel's fault.
1. It's a good hotel. Although it's a bit old, the view of the two banks of the Pujiang River is not comprehensive. Because the 17th floor is not high enough, and the Seagull Hotel is just in front of it. It may take more than 23 years to see the whole Bund. But at least the Bund is comprehensive. From Garden Bridge of Shanghai to Jinling Road, you can see the Bund. It's beautiful. The hotel is v…
1. The room facilities are old, and the room is full of musty smell. The network charge is 1 yuan per minute and 100 yuan per day. The top floor restaurant is very good, with a beautiful view of the Huangpu River..
1. "The hotel environment and the quality of the rooms are very good, and the service level is professional. After staying for two days, I really feel quite good. The buffet barbecue on the second floor makes people feel at home"
1. The geographical location is excellent. It only takes 4 minutes to walk to the Bund, which is really the gold in the prime location. The room is very large and clean. I am extremely satisfied with the facilities in the room. The Internet speed is like flying. It is very quiet at night. It is really an unspeakable enjoyment to enjoy the scenery of the Huangpu River outside the window in silence…
1, "In my luxurious room, the quilt is too thick, and it's too hot to sleep at night. The service attitude of the receptionist is average, but I don't see a smiling face. The hotel service is good."
1. I ordered it for a foreigner customer. The environment is good and worth recommending. I stayed in a deluxe room, but the price is too high. I hope Ctrip can negotiate with the hotel about the price again. It would be better if it was cheaper. The customer said that he would stay next time!
1. The price this time is a little more expensive than before, but it is still the first choice for customers to live here. The environment was excellent, and the service was also good. The waiter at the door was stunned. Everything else was great. The customer was quite satisfied~~
1. The price this time is a little more expensive than before, but it is still the first choice for customers to live here. The environment was excellent, and the service was also good. The waiter at the door was stunned. Everything else was great.
1. I was very satisfied with the big bed room in February 2008. It was indeed a 5-star level, and the price was also low at that time. I will go there again next time.
1. The hotel is very close to Hongqiao Airport. The hardware is also good. The self rental service needs to be improved
1, "The hotel hardware facilities of Marriott should be quite good, just because of the reason for checking in during the Spring Festival. It seems very cold and there are few other guests. Most of the supporting facilities have also closed down, except the fitness center. The female cleaners in the fitness center ignored the guests when they asked where the slippers and bath towels were, and rep…
1. The room is very comfortable and clean. Although it is not busy around, it is quiet. It is quiet away from Hongqiao Airport. Usually, the price is very expensive, but because it is during the Spring Festival holiday when you check in, the price is super!!!
1. The hotel's hardware is good, the rooms are quite new, the lobby is magnificent, and it is suitable to entertain foreign guests, although the location is far from the city center. It would be better if the front desk service attitude was a little more cordial.
1. Extremely good hotel. The four-star standard is totally worth enjoying. The service is very good
1. The hotel is super value. It doesn't cost 300 yuan to stay in a standard room. The room is clean and comfortable. The receptionist has a good attitude and the hotel management is very high. You can stay until 2:00 for free.
1. Everything is OK. Why can't we be more flexible about rooms booked through the Internet? Half day rooms are reasonable, especially when changing to a chain hotel.
1. Because it is a new room, the room facilities are pretty good, and the room service is also very good. However, the hotel service is not very good. The food in the western restaurant is also not very good. The breakfast is OK, and the geographical location is good. It belongs to the center of the city, but it is not convenient to park. I will consider staying next time.
1. Generally speaking, it is very good. The environment is very good, especially the breakfast. It is very competitive. I compare the breakfast in several four-star hotels during the Spring Festival, and it is the best one in his family.
1. The hotel facilities are really old, but the carpet can be replaced. It's broken but dirty. The service attitude is good. Every customer arrives, a waiter will send you into the room, and a pot of tea with thermal insulation will be sent into the room. It's very warm.
1. Generally speaking, I have a good impression. The room is clean, tidy and fashionable, and the Internet is fast. For some customers with high requirements, it should be noted that the shower for bathing is fixed, unlike ordinary shower heads, which can be washed by hand.
1. A friend checked in at the previous stage. I felt it was very good, and I also had a high opinion of the city's environment.
1. The location of the hotel is pretty good, the environment is OK, and the room is a little small.
1, "Before I went to take the city, I booked a deluxe executive single room. The discount was 380 yuan. When I got there, the airport pickup service was pretty good and very punctual. The driver also took me to another place I wanted to go first, instead of going to the hotel to check in directly. They also helped me to make room reservations. I entered the hotel at 16:00 after I finished the wor…
1. The location is good. The central area of Xujiahui, Shanghai, has an average cost performance ratio and a large room
1. Every aspect is average. As long as the expectation is not too high, it is OK.
1. On July 19, I felt that the hotel was better and the shortcomings were as follows: 1. The signs from Building 1 to Building 2 were not obvious, and I had to walk a long way. 2. The service staff seemed not to know what it was like to greet each other on their own initiative, which was far worse than the Seaview Garden Hotel. In the lobby, corridor and courtyard of the hotel, when I saw the ser…
1. Very good, very good service, located in the downtown area, convenient transportation, but the price is also high!
1. The room is very good. It is very close to the subway station. The service was also very good. The price is reasonable. The lobby manager and assistant manager were both very good.
1, "Considering the location, star level, price, environment and facilities, this hotel is quite good. If there are no other factors, we will stay again next time. In order to make your hotel develop healthily, we would like to remind you of several points: 1. The service lady at the front desk of the liquor restaurant is not professional enough and has no professional smile May affect the rest o…
1. I stayed once, which was OK. But Ctrip's room is always bad
1. "The price is moderate in this area. There are breakfast shops and small restaurants nearby, which is convenient. There is no breakfast or place."
On July 1 and July 2, the deluxe sea view room in the hotel was reserved after watching Ctrip's comments, facing the sea, which was really good. In particular, the hotel has a lot of supporting recreational facilities, clean swimming pools, bowling and golf driving ranges give 20% discount to guests staying in the hotel, and the attitude of the hotel service staff is also very good. My son especi…
1. Down quilts, pillows and towels are thick enough to have a four-star feel, and they are also very clean. Bathing is good. But the room decoration is average. Breakfast was good, but it was expensive. Overall, I felt it was expensive.
1. The surrounding environment of the hotel is quite chaotic. Many hotels in Harbin have this problem. However, the internal environment of the hotel is OK, the cost performance ratio is good, and the hotel is close to the business center and the railway station. In addition, the hotel takes the initiative to upgrade Ctrip guests for free, which feels very good. The service staff are also friendl…
1. The online comments on the hotel are not very good, but because it is close to the railway station and the transportation is very convenient, I chose this hotel. After I checked in, I felt pretty good. The service staff were polite and enthusiastic. One thing happened during my stay made me feel the humanized service of the hotel. I had a heart attack that day, and the hotel service staff prom…
1. The first time I lived here, I paid special attention to your opinions. I feel as follows! 1. Although the standard room is a little old, it is very clean. The quilt is very comfortable and warm. The bathroom is also very large, because it is close to many in the commercial center. 2. The hotel service was fairly good. It wasn't like what was said here. It was also very fast when checking in a…
1. The room is very clean and the big bed room is very comfortable. Printing is expensive
1. After the TV is turned on, there is a welcome message for the guests to stay on the screen, which is warm. The rooms are clean, the toilet facilities are complete, and the traffic near the hotel is convenient.
1. It is close to the North Railway Station and the long-distance passenger station, and the rooms are clean, but the price without breakfast is not competitive.
1. The overall feeling is good. The room is not big, the color is mild, and the bed is soft and comfortable. I have just been there. The indoor temperature is very high. The hot water comes out after the bath water is put in for a few seconds, which is much better than some hotels. The breakfast is almost RMB 40. In particular, the people who make fried eggs are no longer old, and they haven't ea…
1. The service was very good. 24 hour meal. We arrived at the hotel at 10 p.m. to provide dinner for us. We were very touched and the price was relatively affordable. The only problem is that the check-in procedures for Building 1 and Building 2 are handled separately. We first drove to the lobby of the hotel and were told that this is Building 2 and we should go to Building 1 to handle the proce…
1. Advantages: The service in the lobby and the housekeeping department is very good, very friendly (because there is no refrigerator specially to help us get ice from elsewhere). The special big bed room offers tea pillows, some magazines are interesting. The geographical location is good. There are shopping malls such as Carrefour around. The transportation is also convenient. The breakfast is …
1, "I stayed in the special big bed room for the second time. I want to praise it. There have been many improvements. I can see that the hotel is still working hard. There are free books in the special big bed room. There are seven or eight kinds of books. There is also a tea pillow in the tea garden. My girlfriend is very happy. It smells good. There are also free CDs and DVDs to rent. As long a…
1. The facilities are old. I don't want to look like they were decorated in 2005. The bathroom is also average. But Samsung is just like that. The bed is too short. I'm not very tall, am I. I lay down a little and my feet were hanging out of the bed. The bedside table has a small radio, which is very distinctive. The business room has a computer, and the Internet speed is also very good. I live i…
1, "No. 1 has just been there. The hotel is very old, and the seascape villa is very noisy. The rooms are very dry and air-conditioned during the day. Mosquitoes are everywhere. The restaurant is terrible. The waiters are too tolerant. The sea is beautiful. The beach is very bad and dirty when it is very far from the sea. It is much worse than Sanya."
1. I live in the sea view suite for the second interview. I can see the sea from the balcony. When I lie on the bed at night, I hear the sound of waves. I feel good. The attitude of the waiters is very good. The disadvantage is that the transportation here is not convenient. If I go out, I need to call a taxi from the front desk. The hotel facilities are just average
1. It's a comfortable hotel I stayed near Beidaihe. It's managed by Gloria. The service and facilities are quite formal. The room is a little old, but it is clean and tidy. The water is a little yellow. I suggest you bring more bottled water to drink. The environment is good. Very good service, very efficient. I am satisfied with the restaurant. The food tastes good, but it is not very expensive.…
1. Very average, not competitive. I got a big business bed room with a computer. Hehe, I paid an extra 209 yuan for nothing, which is the same as no discount. It's still quiet. Other things are very average. The TV is too small. It's estimated that 21 inches. I can't see what's on the TV. Poor. The hotel feedback: July 9, 2008: At present, we have applied to the company for replacing the TV. For …
1. Although this hotel is a little far from the city center, the scenery and service are very good. The hotel has complete facilities, and you can walk to the seaside. The hotel can also contact the driver for you and deliver breakfast to your room in advance, without additional charge. The catering taste of the hotel can also basically meet various requirements. I will stay in this hotel next ti…
1. The room environment is very clean, but the place is not very easy to find, hehe.
1. Although the room is small, it is very clean! I feel a little at home. I will live in the future!
1. The business king size bed room ordered is OK on the whole, and the facilities inside are simple but humanistic; The attitude of the hotel staff was very good and friendly, but the breakfast was not very good.
1, "After staying for one night, the environment and facilities of a very good hotel are very good, especially some small details in the guest room, which makes people feel comfortable and convenient to live in. If the price is more popular, I believe it is a good hotel!"
1, "The service attitude was very good. Although something unpleasant happened after the check in, the lobby manager's timely and unexpected handling made this check in a particularly good memory. In the future, we will choose Ruiji Hongta if we have the opportunity."
1. So far, it is the first hotel I want to visit next time. I can feel the five-star service both in terms of environment and service. Although it was the Spring Festival when I went there, and some restaurants were closed, the service provided by the waiter was very considerate.
1. On the whole, it was very good. I went to the buffet on the 39th floor at noon and took the children with me. I knew that our children would have to pay half the price before I came in. However, the children are very picky about their tastes, and they basically don't eat anything. The hotel took the initiative to exempt the children's fees when checking out. Although it is only over 100 yuan, …
1. I drove to the hotel by myself. If I checked in at night, I couldn't see the entrance of the hotel at all. I tried to make a phone call to the hotel while asking the people in the car to identify it carefully. As a result, I managed to drive to the main entrance of the hotel in many wrong places. It was raining a little that day, and only one security guard came. I still couldn't see the entra…
1. On December 1, I stayed in Ruiji Hongta again. The service was still very good, but I didn't feel the smile of the past. However, the swimming pool in Ruiji Hongta is as good as ever
1, "Once again, the service is as good as ever, impeccable, but the price of Ctrip is a little expensive~"
1, "I stayed in the deluxe sea view big bed room on the 7th and 10th. Before booking with Ctrip, I called the Blue Sky Hotel and told me that I had no room. I was still depressed. But with the idea of trying, I submitted an order at Ctrip and unexpectedly sent me a text message to confirm it! At that time, I was very surprised because I took my baby with me. I was afraid of making a mistake. Late…
1. "The environment and service are all very good. Apart from the high price, there is nothing to be picky about."
1. Ruiji Hongta is the first choice of several old customers of the company. The room facilities are the best among the five stars nearby. The office furniture is very comfortable, and the bathroom decoration is also very exquisite.
1. I have lived here many times. The location is convenient. There are many places to eat around. It's just that the room is a little small.
1. The hotel room is not bad, and the big bed is very comfortable. I slept soundly at night, but the computer provided in the room could not be used. The lobby environment was less than the four-star standard, but a little higher than the three-star standard. Additional comments July 20, 2008: The hotel room is not bad, and the big bed is very comfortable. I slept soundly at night, but the comput…
1. "The room is relatively comfortable, the hotel service is good, and the lobby is bright and clean"
1. It's convenient to live here when working in Nanshan District. There are cars in any direction at the entrance, but it's a little noisy
1. First of all, the service is very good. The service level in the south is generally higher than that in the north, which makes people feel at home. A little girl at the elevator asked about the floor she went to. She thought it was the elevator to greet guests, but then recommended the entertainment floor, which gave the guests a bad impression. The hardware is very common, which is Samsung st…
1. The service of the Blue Sky Hotel is absolutely good. Every employee of the hotel smiles when he sees every guest and says, "Hello!" The service is very considerate. The food in the restaurant is also very palatable and the facilities are complete. The four-star hotel has five-star service. Our family is very satisfied. We decided to go to Weihai next time and stay in the Blue Sky Hotel.
1, "I have stayed in all the five-star hotels in Nanjing, and whether I choose to go or this one (the former Shangri La). No matter the hardware facilities or services, they are impeccable... If there is a disadvantage, the room price is very expensive. Ho ho, I hope Ctrip can talk about a more favorable room price."
1. Morning was OK. The hotel environment was very good. However, there is still a big gap between Dingshan Building and the main building
1. The room is very clean! Breakfast is very rich! The doorman is very good! This is the second time we have ordered it. I will stay in the future.
1, "The hotel is slightly off center, but it is worthy of being the Shangri La of the past. The hardware and service are still good. The crib provided is great, but there is still a charge for Internet broadband, which is not in line with the international trend."
1. I like the bathroom in the room most. Big bathtub. The bathtub also has a shower. Very convenient. The space of independent shower room is also large. I will choose in the future
1. The deluxe room is new and beautiful. It is as big as a suite and has a special luggage room; The balcony is very large. The bathroom has a bathtub, a shower and a small dressing room. The service is also first-rate. They are all girls who have seen the world, professional and decent. The restaurant is also very good. "Eating in Dingshan" means the price is five-star. In a word, it is a super …
1, "The location is very convenient, but it is close to the railway station, which is a bit disturbing. The room configuration is still impressive, which is less than four-star and better than three-star. The highlight is that there is a tap for drinking directly in the bathroom."
1, OK!! At that time, I saw that some people commented that there were many harassing phones. I was still scared. The result was very good. Where is the phone? When we call ourselves, the front desk will check our identity carefully and the room is also very good. The service is really the best hotel in Xuzhou!
1. The room is not very big, but the bathroom is very creative. The breakfast was very good. There were many varieties and it tasted good. The attitude of the service staff was also very good.
1. The transportation is quite convenient, both advantages and disadvantages. Living on the 10th floor is still noisy. Everything else is OK, four-star.
1. The room is very small, a bit like a guesthouse Four Stars
1. The location is very convenient. I walked around the railway station for 3 minutes, but the driver overcharged me for taking a taxi for the first time. The only disadvantage is that I was too close to the railway station. The sound of the train is troublesome. Who made Xuzhou a major traffic artery since ancient times? Hehe. Check in next time if possible.
1. The geographical location is very convenient for business travelers. It's easy to find
1. The hotel is in a good location, but it is inconvenient to take Texas. Although there are not many kinds of breakfast, it is very affordable and delicious. Supplementary comments: On January 3, 2008, the hotel had a warm and considerate service attitude. When I checked in, because there was no room type I had reserved, the hotel took the initiative to upgrade for free. The railway station was …
1. I like this hotel because there is a smile! Because it's convenient! Because the price is reasonable! And Qingdao Beer at No. 56 Dengzhou Road! When I came to Wuhu, I often couldn't get the letter of state due to hurry. What a pity!
1, "The receptionist was very friendly. Because of my work, when I left the hotel at 5:00 a.m., the hotel prepared breakfast for the guests, which made them feel very warm and considerate."
1. The transportation of the hotel is not very convenient. It is far from the city. The railway station costs about 17 or 8 yuan. Because it is located in the development zone, most of the people who live here come to work in various companies in the development zone, especially Chery's suppliers and customers. To tell you the truth, there are some unexpected surprises. Unexpectedly, Wuhu has suc…
1. The environment is good and the room is very clean. The quality of the service staff was very good, their attitude was very good, and the checkout was fast. If the hotel staff can see this, it is suggested that the meal roll can be reprinted. I was misled to the fourth floor at breakfast. A little uncomfortable.
1. The hotel has a limited room type, but the business standard room is still good, and the facilities and services are up to standard. However, the room we stayed in this time is the one on the edge. The temperature of the room is relatively low, and the thermal insulation is poor. The buffet breakfast and lunch taste is OK, and the price is moderate. What this hotel does not lack is that althou…
1. It costs 15 yuan to take a taxi from the city. It's a little remote, but I found the environment was good after I arrived. I was quite satisfied
1. "The only four-star hotel in the technical area has a modest appearance, but the service is very good, especially"
1. The service attitude was good. The sound insulation in the room was a little poor. The breakfast was terrible
1, "This is a three-star hotel with good value for money. The facilities are complete, including small towels/hair dryers in the bathroom. The house is newly decorated. The service attitude is as good as the smiling service at the front desk. The hotel is located in the center of the city but noisy near the street, and the sound insulation effect of the room is not good. The breakfast is average.…
1. The hotel you stayed in at the end of May is OK for Samsung. It's not expensive. Maybe its location is not prosperous. The cashier at the front desk had a very bad attitude. The room was very good. Maybe it was ordered from Ctrip. Generally, the room location was pretty good.
1. It's just a little old. Some rooms have small windows and poor sound insulation. Others are very good. After all, they are old three-star!
1. The environment is very good, the location is very convenient, and the service is also very good. I will stay next time!
1. It may be that I stayed for a long time, one month, so the service was very good. I stayed on the 15th floor, and it was quiet at night. Although it was a room facing the street, the breakfast did not change much.
1. The room facilities are old, the sofa is probably from the 1950s, and the bathroom is very small. There are many kinds of breakfast, the revolving restaurant is good, and the transportation is convenient.
1. There is a computer in the room. Although the room conditions are slightly poor, the environment, service and food are still very good. If I go to Wuxi next time, I will still choose here.
1. The room is clean and tidy, with computers for playing games and surfing the Internet: -) The air conditioner is a little loud, and everything else is good. There are price tags on all indoor charging items, which is very reasonable! The plug system of my mobile phone charger is different. The room service has sent the charger and the changer successively, which is very efficient. Buffet break…
1. The hotel itself is very good. The service in the restaurant is up to standard. The only thing is that the hotel location is not very good and the surroundings are not very good
1, "This hotel is really good. After staying here for four days, I got three surprises: 1. The room is bigger than I thought, and there is a sofa
1. Very good. The service and room facilities were very good. I went there with my girlfriend on the Dragon Boat Festival. My girlfriend's mobile phone was out of power, so she asked the front desk to borrow a universal charger. It was delivered soon. The food there is also very good, delicious, hehe. Overall, it's good
1, "Just returned from Wuxi and stayed in 328YUAN, Building 2 of the hotel. The overall feeling is as follows: the room is clean, the preparation is complete and the liquid lens computer is available; the food is delicious and not very expensive; the most commendable thing is the service level. My husband carelessly dropped his mobile phone, and the staff sent it back immediately after picking it…
1. I went to Wuxi last weekend and saw the recommendations of all netizens. The friendship I stayed in was generally good. On the whole, the previous netizens have said that the surrounding environment of the hotel is ordinary, which can't be compared with scenic spots or noisy. This is generally the case in non prosperous urban areas. Fortunately, the hotel is inside, so it basically has no impa…
1. "Service: There are only four star level problems on the whole: low hardware level, poor room sound insulation, thin doors and walls, long checkout time and low breakfast quality. However, there is no better hotel to choose from in this area."
1,1。 The environment is good. The Three Gorges Square is not far away. If you are bored, you can go to see Beauty 2. Breakfast, great! 3。 The checkout is slow. Generally speaking, it's pretty good
1. It is the best hotel in this area, but there is a gap from the hotels in the urban area.
1, "The swimming pool is being renovated without prior notice, which is very bad, otherwise I won't order it"
1, "It's good to work in the sand area. I have to choose this place because I work in the sand area."
1, "Hotels of the same standard are a little expensive! The overall feeling is fairly good, and the location is very convenient. Our company's people live there every time they go there! The buffet is good! The snack square next to it... can be slandered!"
1. The hotel is quiet, which is a typical business accommodation option. Breakfast is not a buffet but a set meal, which is also very distinctive. The traffic is convenient mainly along Tianjin trunk roads. Without entertainment facilities, those who like lively activities should not live here.
1. The fifth stay for VIP customers is worth recommending! The service is speechless!
1. This is a very good Sixing Hotel. It is the fourth time for our VIP customers to book an executive luxury room. It is very good, but the room is slightly smaller, but it is generally very good. The service industry is very good! It's worth recommending!
1. A very good hotel, which is reserved for our distinguished customers. Check in the executive floor at the weekend. The windows on the 28th floor of the executive floor have a good view of the room facing south. You can overlook the viaduct of Yan'an West Road. Because it is the top floor, the sound insulation of the viaduct is also very good! The hardware facilities are very good, meeting the …
1, "It's OK. The sales promotion is 399, and the price is good. But the hotel is hiding behind the new workshop, which is really a scar."
1. The service was very friendly, the room temperature was just right, the sound insulation effect was good, the location was superior, and the cost performance was high. I will stay here next time!
1. We don't bring breakfast with us, so we can't evaluate the food. Overall, the decoration was pretty good, there were no major problems. The car will be charged 20 yuan a day for parking, and then reimbursed at the front desk. The air conditioning is very adequate. It's a little too hot. It's very good to stay in such a hotel at this price. I think it's quite suitable for family travel. The onl…
1. It's a good hotel. Breakfast is also good. The room is comfortable. It's still a satisfactory reservation. Feedback: August 8, 2008: Thank you for your support! We will continue to maintain the five-star catering and service standards, welcome you to stay again, and sincerely wish you good health and smooth work!
1. Everything else was OK, but the breakfast was average. The hotel facilities are not as good as Sheraton in other cities. Hotel feedback: August 8, 2008: Thank you for choosing to stay in this hotel! Recently, the newly appointed Singapore Executive Chef of our hotel is improving the dishes according to the feedback of the guests. At the same time, there are many new catering promotion activiti…
1, "The first time I visited the hotel after changing the signboard, I felt no change. Many hotels reported that the price of buffet breakfast had risen. On August 8, 2008, thank you for your support! We will continue to maintain the five-star service standard, welcome you to stay again, and sincerely wish you good health and smooth work!"
1, "The hotel was recommended by Ctrip at the weekend, and the starting price was reached from Wuxi Railway Station. It seems that the hotel is in the center of Wuxi, and its location is absolutely amazing! The driver on the bus said that it was the former Sheraton Wuxi Hotel, which should be good. Everything was smooth and fast to check in. The MM at the front desk felt that it was also well-tra…
1. Although the signboard has been changed, it is basically a matter of changing the soup without changing the dressing. I should not stay again next time. The cost performance ratio is average. The hotel reported that on August 8, 2008: Thank you for your support! Recently, the hotel has launched a new room promotion on weekends. We will continue to maintain the five-star service standard. Welco…
1. It is near Wuxi Commercial Street and the railway station. Very convenient. The nearby food store is also within walking distance. Very convenient. The room is in good order, decorated in pure wood color, very comfortable. I don't like green carpet, but it is also the first choice of many star hotels. With Ctrip booking, you can get online for free (50 yuan/day). There are also two free drinks…
1. The location of this hotel is good, and it is convenient to travel in the downtown area of Wuxi
1. I checked Ctrip's comments before, so I don't have high expectations for this hotel. However, I felt that it was OK on the whole after I checked in. Although there was still a gap in five-star rating, it should be acceptable in Jilin. There seems to be no suitable hotel around the hotel. Finally, I ate Brazilian BBQ buffet in the hotel, which is 88 yuan/person more expensive than other places,…
1. There is no breakfast, the hotel price is relatively expensive, and the room equipment is relatively old. But it's not bad to have a swimming pool! Japanese cuisine and Brazilian barbecue buffet on the second floor are not bad!
1. Older hotels, rooms and other facilities are also older, and the service is OK
1. When I called the hotel to ask for directions, the switchboard said I didn't know. When I turned to the concierge department, several guys were unfamiliar with me. I couldn't even tell the east from the west. However, I finally said a landmark building, which gave me a direction. I asked the Business Center to buy a map and ask it to be delivered, but I said that the Concierge Department was b…
1. The best hotel in Jilin. Check in and check out speed was fairly good. The room is in good condition. The bed is not as comfortable as that in Changchun every day. It feels hard.
1. The hotel is a middle class hotel, but its location is very good, and the price is acceptable. I should stay here next time
1, "Although it is a viewing room, the floor I live on is too low (19th floor) to see the river view, but the location is very good. It is close to Linjiangmen Station and Jiaochangkou Station (starting point) of the light rail, and Monument to the people's Liberation is nearby (about 100 meters)!"
1, "The hardware and location of the hotel are good, but the service is very angry. On the day of the earthquake on December 12, I checked in through Ctrip. The next day, because of the delay in doing business, I didn't have time to check out. In the afternoon, Ctrip asked whether to check out? But after 12:00, we asked to extend our stay. As a result, we were told that the price of the two rooms…
1. The room has a good view. It is mainly convenient. The Pacific Square is the most prosperous place
1. The location and room of the hotel are very good, and the price is quite appropriate. I recommend you to stay
1. The location of Yangzi Island Hotel is very good. It is convenient for shopping, eating and entertainment. The opposite side of the hotel is Metropolitan and Pacific Shopping Mall, and behind it is Meimei Department Store. The decoration of the hotel is also very good, clean and tidy. Most importantly, the price is relatively cheap. In short, as a four-star hotel, Yangzi Island has excellent s…
1. The location of the hotel is very good. It has just been renovated, so the facilities are passable. There is a computer in the room I ordered, and the Internet speed is good. It's just that the mat in the bathtub even has black marks, which makes people feel bad. Breakfast is very rich, but it seems that the hotel breakfasts in Chongqing are very similar. Overall, I felt it was pretty good!
1. First of all, we should say that Ctrip's service is very up to standard, which provides a lot of convenience for me. Next, let's talk about the good places of the Yangzi Island Hotel: 1. The location is really good. It's less than two minutes' walk from Monument to the people's Liberation. There is a lot of food, shopping and watching around. 2. The waiter was very friendly, especially the doo…
1. It's a good hotel. I often stay here and am familiar with the surroundings and the hotel environment.
1, "The room price of Furong Riting Hotel is more affordable than other four stars in Chengdu. The upgraded executive floor has a large room. There are all the rooms that should be. It is impeccable. It has cultural characteristics and is close to Wenshu Square. The details in the room are well considered, giving a very warm feeling, no mistake! The hotel feedback on June 13, 2008: Dear guests: H…
1. I have chosen to stay in this hotel for many times, which is good in general. This time, it may be because the hotel has contracted a meeting, and the room is a little nervous. Later, it was upgraded to a large bed (water bed) room. There is nothing new about the hotel breakfast, which is similar to the previous ones.
1. Location of the hotel: 4 minutes, average location, close to Wenshu Hospital of the railway station, easy to call taxis, about 5 minutes waiting. Hotel environment: 5 points. The distinctive Furong Culture Theme Hotel is very popular. As a 4-star hotel, the service attitude is a little poor.
1. I feel that it is not new or luxurious. The Sanaa Massage on the underground floor (which should be independently operated, of course) cheated money and deliberately didn't say it would cost more room.
1. My family and I started to stay in Tianfu Sunshine Hotel on May 7. Although there was a little misunderstanding, it was quickly resolved through Ctrip's communication. I was very satisfied with the hotel's positive attitude and the meticulous service afterwards. It is worth mentioning that on the day of the earthquake on May 12, the hotel took emergency measures and was responsible for the gue…
1. I lived in Jiuzhaigou last October and felt very good! I went to work with my colleagues again this year and felt that the service was poor. Feedback from the hotel on May 27, 2008: We hope that the guests can give us valuable suggestions and comments on our service. We are willing to accept the criticism of the guests if the service is not good enough
1. The price of Tianfu Sunshine is reasonable. The hardware is also very good. The service attitude was very good. When I checked in, the lobby was being renovated. This hotel is foreign-related, and many of its external shortcomings are: the breakfast is relatively simple and not very delicious
1. The price performance ratio is high. I stayed one night and then came back from Leshan to renew my subscription for two nights. I was quite satisfied.
1. It's a good hotel. The only thing is that the room is smaller and the bed is harder. Everything else is pretty good
1, "It is unimaginable to be close to the West Lake. Young people have to walk for 10-15 minutes. Because the window does not face the West Lake, the view of the West Lake is almost invisible. You should stick your head out and barely see the lake at the far end of the commercial street."
1. Generally speaking, it is OK. There are several shortcomings: 1) The toilet smells; 2) It's not convenient to take a taxi. You have to walk across the bridge to the street to greet people. 3) The food in the Chinese restaurant is expensive
1, "It is close to the company, so I chose this 3-star hotel with competitive catering prices, which is close to ordinary hotels. Free registration website navigation hotel index service description About Ctrip's recruitment of talented agents for cooperative advertising business Contact us Copyright1999-2008, ctrip. com. allrightsreserved."
1. The hotel's accommodation environment is good. The front desk service is very friendly. You can see the Yangtze River and Gezhouba in the room. The shower facilities in the bathroom are not very easy to use. On the whole, it's a good place!
1. There is a parking lot. The room is clean and quiet. Every aspect is fairly good, but the price is still higher in Zhaoqing. Last time we had an event in Zhaoqing Huangchao, and the room facilities were at least one level higher than that of the Star Lake Hotel, which only cost 260 yuan.
1. Not bad, but it's hard to find because Changning Road is too long. The driver can't find a taxi, which wastes a lot of time.
1. The hotel is very good. The service staff are very good and polite. It is clean, quiet and convenient for transportation. The disadvantage is that it takes me half an hour to check out
1. The hotel is very quiet, and the location is not easy to find. I turned around the intersection of Changning Road and Zunyi Road and didn't see it. Finally, I found it according to the number plate, Lane 1600. After getting off the Zhongshan Park Subway Station, go west along the right side of Changning Road, pass Zhongshan Road Crossing (elevated road) successively, and then go on the left si…
1. The room is spacious and clean. There is a small LCD TV on the wall. The bathroom can only shower without a bathtub, but it is no problem. Changning Road is a big road, but because the hotel is located in the lane, the environment is quiet. I like Jinjiang Chef. The price is cheap and the taste is delicious. The service attitude is also OK. The price of 229 yuan is really competitive. There is…
1. As an economic chain hotel, I think Jinjiang Star is better than Home Inn and Motel Inn. The most obvious thing is that the room itself is spacious, the toilet is not cramped, and the toilet is lengthened. 10 yuan breakfast is rich. The color and tone of the whole hotel look comfortable, just like home.
1. I live in the commercial standard. The room is good, very clean, and the service is also good! I will stay next time...
1. In principle, I was satisfied with staying in the executive building suite for three days in late April, but I still have the following opinions: 1. Maybe the walkway and kitchen have a musty smell after being decorated for a long time, and the kitchen equipment has also been severely yellowed for a long time If we can provide simple cooking utensils, we would like to better meet the definitio…
1, "The same rooms are small and large, and the geographical location is relatively remote. Breakfast is not a buffet, but a set meal. What can't be selected by yourself, and what is not a set meal should be purchased by yourself. This is very inconvenient, and I don't like it very much. The hotel feedback on April 7, 2008: Thank you very much for coming to our hotel, and thank you for your atten…
1, "Transportation: it's convenient. Call a taxi at random, and you must know it. Decoration: it's deep and stylish. The bath products are passable, and the bath towels look old. Service: ordering supper, we can give a clear solution, and let us order takeout. However, there seems to be room for improvement if we check the telephone number through 114. Breakfast: poor. There is nothing to eat. At…
1. I stayed several times, and this time I took my friends to check in with me. As a result, the breakfast in the hotel was so disappointing. It was getting worse and worse. There was nothing to eat when I went there at nine o'clock. I won't come back again.
1, "I live in a business king size room. Although the room is not very large, it feels very warm. There is a computer with free Internet access. When I check out at noon, there is only one waiter at the front desk (maybe I went to eat). I waited for the meeting."
1. The geographical location is convenient. It is convenient for shopping, traveling and handling affairs. The facilities in the room are simple and clean, but the overall building facilities of the hotel are relatively old.
1, "Good hotel, good service, will stay next time~"
1, "The transportation and food here are convenient, the service attitude is good, the cost performance is good, but the hot water is not too hot, which is worth recommending."
1, "I booked a room and stayed for three days. It's of average quality, but it's worth the price."
1. I temporarily decided to go to Beijing for a business trip. I quickly made a reservation. The room was good, and I stayed here for two nights. This is the most economical place nearby, and the quality is the best!
1. The hardware is good, the service attitude is also good, and I will choose to stay here next time when I go nearby
1, The plane arrived early in the morning and the check-in office was very fast. When the reservation was made, there was a requirement to stay away from the road. The people on duty came to the fourth floor to care about this. It was good. The single room was not very big, but the layout was reasonable. So the space was enough. It was very simple and clean. The bathroom was simple enough. The ho…
1. At the end of October, I had just stayed for three days. I felt that it was really good. The room was large and clean. Although it was close to the street, the sound insulation effect was pretty good. At least when I lived, my service attitude was very good. I asked for a hair dryer and a few bags of tea very quickly. The only regret was that I didn't provide credit cards for consumption. Howe…
1, "Yes, yes, yes, yes, yes, yes, yes, good value for money"
1. The price is moderate, and the decoration is OK. Breakfast was OK. Value for money
1. The location is good, the price is appropriate, the environment is good, and the room is clean. It's already very good in places like Shijiazhuang. I will book this hotel next time I have the opportunity.
1. Good hotel, very affordable, in line with the appropriate market positioning, very convenient in Shijiazhuang
1, "The location is very close to our company. In terms of price, it is cost-effective. The big bed room I asked for is 168 yuan. The front desk attendant's attitude is very good, and the room hardware is average. But think about the price. It is still clean, but the mattress is too hard. BTW: There is no harassment phone. This is a good supplementary comment. March 4, 2008: By the way, there is …
1. Living in the East Building of Dalian Fulihua, the newly decorated building has better conditions than the West Building, and will be chosen in the future!
1. "The luxury business room is very large, but it is quite large and inappropriate. The carpet of the hotel is dirty, stains can be seen everywhere, and there is lingering alcohol in the air. It is recommended that Ctrip visit Huayang Hotel one step away, and many local friends recommend us to stay in Huayang."
1. Having stayed in Yanshan twice in a row, I feel that the overall environment is fairly good, but the configuration of the rooms is much worse than that of four-star hotels in other cities! I didn't even have a hair dryer! The bathroom has a shower and a bathtub, which is more considerate!
1. The room is large and the details are not good. I have lived in Shanghai Xinmei Marriott and Sanya Marriott. This Marriott is the worst. I lost all my Ctrip points when I booked my room. Oh, Ctrip has asked me several times, which is very annoying. It didn't work in the end. Supplementary comments: April 10, 2008: Yes, the air conditioner is not easy to adjust, and it is inappropriate to make …
1. In general, all indicators meet the standard of Marriott. In addition, in the special price period, the price is very attractive. The surfing bathtub in the bathroom of the suite is very comfortable. After playing outside for a day, you can come back and enjoy a bubble bath, which can not only relieve fatigue, but also moisturize dry skin. Of course, bubble bath gel comes with you! The locatio…
1. The room and location were good, the service was OK, but the air conditioner in the room was not good, the temperature was a little cold, but the temperature in the bathroom was very high.
1. Thanks to the name of Marriott. This is the real five-star hotel: comfortable rooms, first-class service. It's just that the place is on the wrong side. The taxi driver doesn't know. I'll stay here again
1. Although the business room is small and old decorated, the furniture is very typical of the ancient capital. The breakfast is ordinary, but it is a revolving restaurant on the 25th floor. The Peony Square downstairs is very good. Unfortunately, it is always cloudy in Luoyang
1. One thing you should pay attention to when staying in this hotel. Don't choose a room facing the West Third Ring Road, or you can still hear the noise on the overpass
1. The room was very comfortable, the service was also very good, the price was high. In addition, it is always difficult to book a big bed room through CTRIP, but you can call the front desk to book it. It seems that the agreement between CTRIP and the hotel is not well done.
1. This is a senior executive room, which is very good. The room is large enough, equivalent to one room and one hall, and has two bathrooms. The sound insulation between the hall and the room is poor.
1. The hotel felt OK, but to be honest, it was not as good as those in Suzhou and Shanghai, but it was very good early. The service attitude was also very good. The transportation is also very convenient, but the surrounding area is being renovated now, which should be a good choice after repair.
1. As other members said, the location is superior, but it is not easy to find. Let me experience the charm of a small alley in Beijing. The surrounding area is still being demolished. The hotel feels warm. If only we could put hair dryers in every room. It is worth recommending to friends.
1, "On the whole, I was quite satisfied. The service was good, warm and considerate. Because we took the children, we helped us change our family room after we went out to play. The room was clean and warm. The room was relatively small, but at this price, the cost performance was still good. Because the hotel is in a good location, 10 minutes away from Tiananmen Square, and it is also near the T…
1, "The decoration of the hotel is really good, but the subway is being built ahead, which has a great impact. It takes at least 20 minutes to get to the hotel by car, which is quite depressing."
1. Last week, I booked two superior rooms. Only this room type has two beds. When ordering, I forgot to specify the double bed, but I ordered four breakfast. Later, when my guest arrived at the hotel, the front desk said: "Only one big bed room has been reserved.". I don't know how Ctrip communicated with Shengtingyuan. It was raining heavily that day, and the guests couldn't transfer to other ho…
1. There are quite a lot of people to live in. It is convenient to eat, drink, play and shop around. It is suggested that Ctrip should give a good discount in the future
1. Also, the training of the front desk service personnel needs to be improved. It is slow, dull, and a little busy. I paid my room rate back in US dollars. However, my 20000 yuan pre authorization was not cancelled for me, and three phone calls failed. I hope this can be improved.
1. I started to book a large single room, but when I went to the hotel, I told me that Ctrip had not made a reservation. I was just about to call to inquire, and I told me that I had another room. Go and see. The room is too small, just enough for a bed. So I returned and booked a business administration suite. The suite is not bad, the room is large, the facilities are not bad, but the price is …
1. The service is commendable and the best in the state-owned hotels we have ever seen, especially the Changxing Pavilion on the executive floor. The considerate service, exquisite snacks, wireless Internet access, and free afternoon tea make us feel very comfortable, especially the quality of the waiters. Sister Cai Xue's smile is unforgettable. The lobby bar is also good. One night at 1030 on t…
1. This time, we stayed in a business king size room. The room was good, large, with coordinated lighting, wide view of floor to ceiling windows, and convenient geographical location. The service staff were very considerate (accidentally pulled the button off my pants, hehe, it was too fat, and the waiter quickly nailed it for me). The smile was also very cute, and the price was within 5 stars. T…
1, "This time I stayed in the old building of the hotel, and the overall feeling was pretty good, but the decoration was too old. The location of the hotel is good. The Huaqiang North Pedestrian Street is just across the street, which is convenient for shopping. The business of the hotel on the day I checked in was light. It can be seen that compared with similar hotels in Shenzhen, the hotel has…
1. Hotel location
1. I stayed in Nanlin Hotel in Suzhou through a friend's introduction. I felt very good once I entered the lobby. The bellboy, the front desk clerk and the lobby manager were all very friendly. It felt like I was at home. The room was also very distinctive. There were poems in gold letters on the background wall. I lived in a landscape room facing south. I felt really good. When I went out, there…
1, "I ordered it for my friends. They are very satisfied with the characteristics of Suzhou gardens. I will stay next time."
1. "The hotel environment was fairly good, but it was very slow to check in. I booked the room for my friend and said it was OK."
1. The hotel is located in the most prosperous Shiquan Street in the ancient city. The environment is very good, with garden characteristics, and it makes people feel very comfortable and comfortable! Check in and check out at the front desk are also very fast. The service staff are very friendly and answer all your questions! The room is also very distinctive. There are golden poems carved on th…
1. Before going to Suzhou, I heard a friend introduce this hotel, so I booked a room through Ctrip. When the taxi driver drove into the hotel, it suddenly became clear that there would be such a garden hotel in the downtown area. Entering the lobby, the bellboy greeted me warmly. When I came to the front desk, I quickly checked in, and the service staff were very efficient. All the way up to the …
1, "This is a very cost-effective hotel. It is a blessed place for Suzhou to enjoy peace in the midst of chaos. The hotel has a spacious parking lot, a large green area, towering ancient trees, and green grass. Climbing up the hill, there is a cool room for tourists to rest. The water is flowing at the foot of the mountain. The room is decorated elegantly and luxuriously. The Chinese style and th…
1, "I went to Luoyang during the National Day and stayed in this hotel. The general feeling is that there is a bus to the Longmen Grottoes at the entrance of the hotel with a good geographical location, which is very convenient (I only spent 30 yuan to get there by taxi). The reception at the front desk is very friendly, but the disadvantage is that the room is really small. It's a bit unreasonab…
1. It was good to listen to a friend's introduction, so I chose this hotel for business trip. Once I entered the hotel, I felt that the courtyard was very large and green. It was very comfortable to look at in hot weather, and the parking lot was large and safe. It was very suitable for self driving friends. The lobby layout of the hotel was very simple. Through the floor glass in the lobby, I co…
1, "The business building, room facilities and surrounding environment are all up to the standard of 5 stars. In addition, it is a quiet place in the downtown area. Shiquan Street and Phoenix Street are the only places to go out. In addition, there are some cultural relics protection units in the hotel, so it is not wrong to walk around in the hotel."
1. The room is a little old, the bed is hard, the sound insulation is poor, and the light in the room and corridor is too dark. The pajamas smell musty. The room is a little depressing. I thought for a long time that the ceiling was too short. The lighting is not easy to control.
1. The location should be a good place in Xuhui. It's very quiet. Next to it is Aiju Primary School. Go right to the intersection and there are supermarkets and fruit stores. There seems to be a western restaurant or bar, but it's not easy to find other places to eat. You should be able to walk to the subway Hengshan Road Station on the left when you go out of the hotel. The hotel environment is …
1. It's still quiet and the facilities are good, but the service level has dropped sharply compared with the previous years. The service provided by the operator and the room service center is very poor. Fortunately, I don't care much.
1. Garden style hotel, with small western-style houses standing in it, is very quiet, and the subway is also near. It is very convenient to travel
1. It is located in downtown but very quiet. It is very close to Hengshan Road and the subway is very convenient. I will stay next time!
1. Anting Road is a small road, and the hotel is quiet in the middle of the noisy. The garden house is very distinctive.
1. The environment is very good, the service is also very friendly and considerate. I will stay next time!
1. The environment of the hotel is good, which is quiet in noisy. But the room is a little small, breakfast is too expensive, and there are not many varieties. However, the transportation is convenient, not far from the subway.
1. Anting Road is a small road. It's near Hengshan Road subway station. The environment is good. It's a quiet place in the middle of trouble. Foreigners in Europe will like this style.
1, "I've been to Suzhou many times, and I've stayed in this hotel almost all the time. I feel very good. The room is very clean, the facilities are very complete, and all kinds of supplies are also very good. The receptionist knows my preferences, and every time he arranges well. After several stays, there will be some small gifts each time. Although the value is not high, I feel very warm, and t…
1. I stayed in many hotels when I went to work in Suzhou. Overall, this hotel is quite comfortable. The location is very convenient, even to the new area. When you go out, the hotel attendant will help you call a taxi. Although the room is a little small, it is very warm and comfortable. It is very suitable for one to stay on business. The bedding is also very comfortable, which can ensure a rest…
1, "I was specially asked to praise this place. The price is very cheap and the service is very good. The room is very good, but it is a little small. The hotel reported that on May 9, 2008: Hey hey, thank you for your encouragement. I believe we will do better with your support!"
1, "The service is friendly, the environment is also good, I like it, but there are not many businesses around and there are few places to eat. The hotel reported that on April 15, 2008, thank you for your affirmation of our service, and look forward to your coming again."
1, "Japanese guests went to the hotel designated to stay in Suzhou New Area, and the appearance was very good, very impressive; the indoor environment was also worthy of the price. Not bad. The hotel feedback on April 15, 2008: Thank you for your affirmation, your encouragement is the driving force of our service, and we look forward to seeing you and your guests again!"
1. The first time I booked this hotel with Ctrip, I returned a price coupon, which can be used as cash. After dozens of room charges have been flushed, the price is pretty good in a 4-star hotel. This time, I stayed in a new building, which is quite quiet.
1, "I am always used to staying in this hotel in Suzhou, and I feel that the hotel is very attentive. Every time I stay in this hotel, there will always be some unexpected surprises. I can't help praising here. Last time I stayed in the hotel, I asked for two more pillows in the room, but this time I didn't mention it. I didn't expect to find two more pillows on the bed as soon as I entered the r…
1,1. The front desk service staff are very polite and friendly. 2. It's a big bed room. The room space and pattern are good, but the carpet is a little dirty, and the refrigerator is noisy at night. 3. The location is suitable for tourists who want to go to the bar at night. 4. There are many good small hotels around the hotel. 5. At this price, the letter price ratio of Gusu is good. I will stay…
1. It is ordered through the schedule. The location of the hotel is average, only close to Canglang Pavilion. It is convenient to get off the expressway. The store has a good environment, large room space, good air conditioning, good washing facilities, and comfortable beds. Breakfast was good. Outside the landing window is a small Suzhou garden space. Although it is simple, it is very good. It i…
1,1 The hotel has a good environment and a good geographical location. It's very convenient to Shiquan Street and Fenghuang Street. It belongs to the kind of quiet in noisy. 2. The facilities in the guest rooms are complete, clean and convenient. The bathroom facilities are also very good. There are many plugs, very good. The room was very clean and warm. 3. The buffet was OK. Disadvantages: 1. T…
1. I decided to stay in this hotel after reading the previous comments, but I was surprised. The big window of the room faces the small garden. I didn't expect to live in the garden of Suzhou. It's very quiet. I was almost woken up by birds in the morning. The design of the washroom is very good, you can see the TV, and the design of the wardrobe is also simple, convenient and practical. In addit…
1. The first time I stayed here, I felt like living in a garden. However, the overall style of Suzhou is the same. Free upgrade to a larger room. Very clean. 260 Including a breakfast is really not expensive. The only thing is that there are fewer kinds of breakfast, but I don't choose anything at this price. The only drawback is that the hotel has no free mineral water... Supplementary comments:…
1. The geographical location is good, and the quiet is the best choice. The room is clean and the layout is reasonable. But the sound insulation effect is too poor. I feel like living in a simple inn. The room near the water has a nice view and is very comfortable. The carpet in the corridor is dirty, which is not harmonious with other decorations. Supplementary comments on July 27, 2008: I check…
1. This is a quiet hotel with elegant environment and convenient transportation. The room facilities reflect the concept of environmental protection and simplicity everywhere. On the whole, it should be a sparrow, although small, with all its internal organs! love it! Ctrip's price is very reasonable, I think it's worth it! Hotels with higher prices than those I have stayed in before are more sui…
1. Very cost-effective. Although it is not listed and built according to the four-star standard, it is very good. The room is large and well equipped. The hotel is conveniently located and close to the bustling area of Chengdu. Several colleagues in the same industry gave high comments.
1, "I just went to stay, and now it is said that I have just been rated as a 4-star hotel. The conditions are pretty good, better than I thought. The sensing lights and decorations in the corridor are pretty good. The only thing is that the door of the room is a little poor, and I can't open it. I hope to improve. My room is 1320 Hotel. Feedback. July 25, 2008: Dear guest: Hello! Thank you for yo…
1. The location of the hotel is very good. The price of 299 is relatively affordable, and the bathroom is newly decorated. But the bed is too hard and I can't sleep well.
1, "As soon as I entered the hotel, I saw a lot of hotel staff in the sun, and they helped the medical rescue teams to carry things. Many people who stayed in the hotel seemed to be medical teams from different provinces, and the hotel packed the lobby for them, which showed that the hotel still supported them. This is the second time I have come to Chengdu, Sichuan, which moved me as an outsider…
1, "When I stayed in the hotel during the Chengdu Sugar and Wine Festival, I was very moved that the hotel upgraded my room to a luxury room for me under the condition that the hotels in the city were extremely nervous, and the hotel service was up to standard. I didn't find what my friends said downstairs. Because the room was a luxury room, I felt that it was very nice, very clean, and fully up…
1, "The location of the hotel is very good, no matter shopping or dining, it is very convenient; the service is also good, the front desk and room attendants are very friendly. The senior room on the 21st floor is very large, and the facilities are also good; the faucet is very special, the water pressure is very high, and the bath is very comfortable. But there are also areas in urgent need of i…
1. "The hotel feels OK overall, but the carpet is not clean and needs cleaning."
1. Not bad, four-star. Pinghu is the only one. Our company's designated hotel, but I didn't know it at that time, but it was actually booked with Ctrip. All aspects are standard four-star. I still live here in Pinghu.
1, "I think this hotel is better in Pinghu, but I think the single room should also be at this price, which is more attractive for us to travel in Pinghu all the year round."
1. I have lived in a business suite for many times. I don't think I can use such a large area. In Pinghu, it's not bad. Breakfast needs improving.
1. I just stayed here for one night a few days ago. The 398 bus is not bad. The bus in the traffic seat is very convenient. Hehe~~It would be better if I had breakfast. I don't need to go out to eat. I will stay in Beijing next time.
1. Since I was in Daoda, I lived in Zhongyu for a long time. One day, I was free of promotion, and one day, I was proud. Shi Ke means that the refrigerator noodles can be eliminated. Recently, it was noisy in the morning. The traffic is convenient.
1. The location looks good. It is opposite to Beijing West Railway Station, but it is very inconvenient to travel. There is no subway around. There are many taxis at the entrance, but they don't take you with them unless you go up for more than 100 yuan. If it's just the starting price and you go cool, he says he has something to do, but it's not a good way to go home immediately for dinner. The …
1. It's not bad in Beijing, the price is OK, and there are free fruits
1, "Yes, there is also fruit tray delivery, which is convenient for transportation, and the Internet speed should be faster."
1, "The hot spring park is in front of the hotel, and the environment is OK. I arrived at the hotel at about 3:00 p.m. and waited for more than ten minutes at the front desk to check in. However, it was very quick to check out. The room was also tidy, but the towels in the washroom smelled like oil smoke. The buffet breakfast was just average. My favorite thing was that someone played the piano i…
1. Because I decided in a hurry, I booked the Jinyuan Hotel by phone. Ctrip's customer service was very patient. Thank you first!:) The environment of Jinyuan Hotel is very good. It is next to the Hot Spring Park. You can take a walk when you are free; The lobby was well decorated. On that day, about three couples were married there, all smiling happily (envied ING); CHEKIN at the front desk is v…
1. The room is pretty good, but it's a little small. The room attendant is fully responsible. Breakfast is expensive.
1, "On February 9, 2008, when I stayed in the hotel, I felt that everything else in the hotel was very good. The only thing missing was that the lobby was always full of smoke."
1. The surrounding environment is a bit chaotic, but there are many lively places to eat. The room was OK.
1. It's a kind of hotel, which has a good sex ratio. The room is big and dry. Next time I will stay in this hotel in Fuzhou.
1. The large bed room in Jiang's villa has perfect facilities and the courtyard has the style of Suzhou garden, which is much better than the Suzhou Museum made by Bestway! It is indeed the "State Guesthouse" in Suzhou. Some regrets: 1. The so-called big bed is not a 2x2 big bed. It must be hard to bring a child; 2. There are always banquets in Chinese restaurants, so we have to go out to eat in …
1, "The bathroom is quite spacious, with a shower room and a bathtub, which are separate. It's really indecent and disappointing to hear a group of people shouting karaoke in the western restaurant when they arrive at night."
1. It's a very good hotel, and it's worth it. Elegant environment and perfect facilities are suitable for leisure and vacation. The waiters are well-trained and professional in dealing with people and introducing hotel related information. Next time I come to Suzhou, I will definitely check in again. The only drawback is that one of the two rooms booked faces the street, and the traffic is noisy …
1. I think it's OK, but it's not as good as Shangri La, and there's no difference between the price and the agreement. So it's better to go to Shangri La
1, "When I went there, the hotel lobby and restaurant were being renovated, and I felt that the lobby was a bit crowded. Because the restaurant was renovated, I didn't enjoy the breakfast I should have enjoyed (they started to deliver it to each room at 8:00, but I didn't have time), but the receptionist had a good attitude!"
1. A hotel with three people staying for two days, which is very satisfactory. The room is spacious and comfortable, and the hardware facilities are good. The interior environment of the hotel is also a garden design, which is good. The service was good, the front desk speed was OK, the bellboy and the driver of the free battery car were very polite. In addition, the location is very good. You ca…
1. This is one of the best hotels I have ever stayed in. It has an ancient and simple environment that other hotels lack, and it occupies an extra large area! The elegant combination of classical and modern! The quiet room is hidden in the ancient forest. Great feeling! I went back when I had a chance.
1, "It's said that a good hotel is much better than before the redecoration. Unfortunately, the sound insulation of the hotel is very poor. It happened that several scoundrels didn't get their rooms that day and kept making trouble. They arranged the staff room and it was still making trouble in the middle of the night. Although it's not about the hotel, it highlights the sound insulation problem…
1, "It's nothing. If you want to feel the prosperous and fashionable side of Shanghai, it is undoubtedly the best. The credit price ratio is OK. After all, it's such a golden location and the transportation is super convenient. It's close to the exit of No. 1 subway, and it almost takes no effort to get to the hotel. I've stayed several times, but the price of 568 yuan after discount is still a l…
1. The service is OK. The facilities are old. The air conditioner is too noisy in Jinan. There is no other choice
1. This is my favorite hotel in Jinan. The service is good, the room is clean and tidy, and the shower facilities in the bathroom are also very good. It's not the fourth time to stay like some old style shower heads on Crown Holiday or Intercontinental. I will choose this one next time!
1. The swimming pool and the bath center are together. It's strange. It's not as good as Zhengzhou Crown. It's better to separate things with strong Chinese characteristics from western hotel chains
1. Quite satisfied on the whole, but the room is not as ideal as expected, not as good as the five-star Sofitel Jinan room
1. The best hotel in Jinan has good service. It is rare that there are Indian chefs!
1. The best hotel in Jinan, with good service
1. The service was very good, especially the customer manager of the hotel. The service was particularly good. He thought about the guests very well. It's not good to call names and praise here. The room is also good. He will stay here next time.
1. It should be a very good hotel in Lanzhou, and a room with a computer has been transferred, hehe
1, "It's more like a complaint than a comment. On the evening of July 15, 2008, three people from our company booked in the Mayor's Building through Ctrip. As a well-known hotel in Guangzhou's service industry, we can't blame the software, hardware and service of this unit, because its price is unusual compared with other hotels. However, when the verbal terms set by the hotel are imposed on the …
1. It's better than expected. Hehe. The service is warm and considerate. The guest rooms are comfortable. It's just that there are a little fewer kinds of breakfast. It costs 30 yuan per night for guests to park. It's not very cost-effective
1. I stayed for three nights from July 23 to July 26. The 338 large bed room has a bed of 2 meters * 2 meters, which is super cool. The facilities in other rooms are ordinary, a little old, but the impact is not big, far from shabby! Overall, I think this price is basically OK, but if compared with the four-star brand of the hotel, it is only three-star standard at most! There is a problem that t…
1. Extremely good. The location is prosperous, next to CITIC Building (temporarily the highest building in Guangzhou), the room is very comfortable, and the service is also very good. The price is also relatively cheap. I'll go again next time.
1, "The hotel checked in and out very quickly; the room attendant's attitude was very friendly; the restaurant's service was very good, and the food was also very good; the hotel's geographical location was very good."
1. The location is good. It is convenient to walk to the East Railway Station and the visa office of the US Consulate.
1. Every aspect of the hotel was very good, especially the English of the front desk staff. CHECKIN and CHECKOUT are fast.
1. In fact, I read everyone's comments before making a reservation. They were both good and bad. As a result, I hesitated again and again. After checking in the hotel (luxury suite), I knew I had booked the right hotel. The front desk service is very considerate, and the room facilities are also very good. Personally, I think it is worth recommending. As I often go to the Mayor's Building, I feel…
1. I felt it was good overall, especially in the details of the hotel service. The milk given by the waiter in the evening and the flowers on the last night impressed Allah very much. Of course, as long as he was in a good mood. ha-ha
1. Good location, complete facilities and first-class service. I hope I can stay in this hotel in the future! Hotel feedback: July 8, 2008: First of all, thank you for choosing to stay at Hongqiao Guest House! Your satisfaction with your stay is the best affirmation and encouragement for our reception service! The hotel staff will, as always, continue to work hard to serve every guest well, impro…
1. The hotel is not as good as expected and recommended. Room 1188 is very noisy, and the balcony on the first floor feels like living on the street when you go out. The room is not big either. Later, I changed the administrative room, but I wasn't very satisfied. Although the room is much larger, other items are not good.
1. I have stayed at Hongqiao Guest House for no less than seven or eight times. Every time I got the service, it was very good to tell the truth. Sometimes there was a free upgrade, which made me feel kind and comfortable. However, this stay was quite disappointing for various reasons. I hope the hotel can consider improvement. 1) It may be due to seasonal prices. This time, it seems that house p…
1. "Ten minutes' walk from Hongqiao Development Zone, convenient transportation and good environment. I will consider staying in this hotel next time"
1. This hotel is the first choice for many of our colleagues to travel in Shanghai, which is very good.
1. The security guard who manages parking outside the lobby does not respect the guests. A car from the municipal government leader is parked opposite, and the long parking space is not allowed to park. The more important thing is to say rudely, "Is this a place where you can park social vehicles?" It really makes me feel humiliated in front of my American colleagues (who know Chinese)!
1. The location of this hotel is good. The Taihu Square next to it is relatively busy. It is a good place to live for shopping friends. The air in the courtyard is relatively good, which is worthy of being a garden hotel. However, the room space is not enough. The width of our big bed is only 1.5M, which is good overall.
1. The service was very good. The room was warm and there was also a basketball court. Unfortunately, there were fewer people playing. It was quiet and suitable for rest.
1. I was very satisfied with a hotel. The decoration was good. There was a problem with the room's network that night. The person in charge of the network was off duty again. The waiter was very enthusiastic and took me downstairs to the business center to get online for free. The delivery service was also very good. In short, I was very satisfied. In the future, I will live in Kunming for econom…
1. The garden environment was good, and the breakfast was also good. The parking space is very tight at dinner time, so I can only park on the basketball court. The toilet facilities are old, and the wash basin is cracked. There is no address or map printed on the small red card "Please take me home", which is strange. There is an internal report in the room. The early one is the 19th issue, and …
1. The staff in the hotel are very warm and generous. Every time they walk by, the staff will smile and say hello, which makes people feel good.
1. 1) The facilities are relatively simple; 2) Breakfast is OK; 3) It is far from the city center
1. The courtyard environment in front of the hotel building is good. The room is not too big, but it is relatively clean, and fruits are presented every day. There is a big supermarket not far from the hotel, which is convenient for dining and shopping. There are not many kinds of breakfast food, but it is reasonable. Overall, I felt it was pretty good.
1, "The overall environment is good, very clean, but there is still a gap between Garden Hotel and Garden Hotel. There is no green garden view. There is no mini bar indoors (not in four-star hotels). There are two pairs of slippers of different models. One pair has a red edge, and the other pair does not. They are not coordinated. They live on the first floor and there are always hotel staff walk…
1, "The location of the hotel is very good. It's very comfortable to walk by the lake in leisure time. The staff in the front office of the hotel are very friendly. I went to the hotel several times, and I felt it was good."
1. The middle lakeside road next to the hotel is very beautiful. It is usually chosen here for business trips. It would be better if the hotel could consider redecorating again.
1. It's the third time to stay in the hotel. I feel good. At least it's warm, safe and comfortable. Every place in the hotel is familiar, and I feel like the owner.
1. It is more suitable for domestic customers. The restaurant on the first floor has a taste of Nanyang
1. When I checked in the hotel, I left my luggage in the taxi. The staff in the front office of the hotel were very friendly and actively helped me find it. I was very moved. The overall feeling of the hotel was good, comfortable and safe. When checking out, I felt that the two front desk staff were busy all the time. They were very skilled and fast.
1, "In June, I stayed in a luxury room in Yunnan Economic and Trade Hotel for two days, which is the off-season. I used the hotel pickup service and breakfast. The lady who picked up the airport happily introduced Kunming and the surrounding environment of the hotel. The breakfast was very rich, the room was very clean, the service was very good, and it was very close to the city center."
1. I stayed in the hotel when I was on business. The location of the hotel is very good, and the service is also very good
1. I stayed in this hotel for the second time. The service was very good, making the guests feel very comfortable and satisfied.
1. I went to the hotel several times and felt it was very good. Especially now there are free laundry and free lunch buffet activities. I feel it is affordable. In addition, several MM of the console are also very good.
The hotel facilities in 2001 are still very new. Good location, close to shopping around the square. The distance provided by Ctrip from the airport is not correct and should be at least 20 kilometers.
1. The location of the hotel was not mentioned, very good! It's just that the lobby is a little stingy, and the room facilities are a little old. It's a lot worse than when it was just opened, but I still like this hotel!
1. The hotel is located in the old city center, with convenient transportation and clean rooms. However, it was opened earlier. Compared with other four-star hotels, the hardware is slightly poor, and there are fewer characteristic hotels around.
1, "During the National Day stay, the price here is relatively affordable, but the room is a little old, not a four-star, three-star almost"
1. "After the May Day holiday, we stayed in this hotel. It was just for activities, 200 rooms per day. It was really worth it. Five of us booked two rooms, one of which was extra bed, and the amount was 100 yuan per person per day. The service and room facilities were very good. The business district was just outside, the post office was downstairs, and the gate was on the street, which seemed to…
1. The service was OK. Because in the city center, the surrounding environment was a bit noisy, and it was inconvenient to take a taxi. The shower was very good. The water quality and flow were quite satisfactory. I will consider staying here next time I go.
1, "The taxi cost 11 yuan from Urumqi Railway Station. On Jiefang North Road, it is not far from Erdaoqiao Market in Urumqi. You can buy dried fruits, or go to some special products: ceramics and carpets. But you should watch out for young Uighur people who wipe their leather shoes. It is said that it costs 200 yuan to be wiped by them. So, when I saw them oiling my shoes that day, I ran quickly.…
1, "The room was newly installed this year, which was very good. The service was good, there was a pick-up and drop off service, the pick-up and drop off staff were very friendly, and the customer felt very good. When checking out, they proposed to change the water bill, and each time they said the system did not support it, but each time they finally changed it. Not very satisfied with this, I h…
1. I felt very good when I stayed in Hongxin. What impressed me most was that the waiter was very enthusiastic and dutiful; The location of the hotel is also good. It takes 3 or 4 minutes to go out and there are shopping malls on both sides. The environment of the hotel room is also good. I stayed in a deluxe standard room, which is spacious, clean and tidy. In a word, I will stay there next time…
1, "Yatian, just the room is close to the entrance and exit, there is a mosquito room, basically a certain level of free registration website navigation hotel index service description About Ctrip's recruitment to the UK"
1, "Every time I go to Harbin, I live here. It's not cool. I'm just used to the fact that the windows of the Jiangjing room can't be opened. There's always the roar of machines. It's easy to close the windows and take a taxi. It's very convenient to say something. One day, I saw a monk and several Shandong seniors collapse at breakfast. I invited them a Bodhisattva and paid them 200 yuan. I asked…
1. The breakfast was poor, there was no free coffee in the room, and there were few TV programs.
The commercial standard room with river view at 1440 is very large, and the lights on the ceiling are very bright. You can see the Songhua River at a glance. The newspaper building has finally opened a free broadband service, but the free condoms mentioned by the lower level friends are no longer available.
1, "The room is spacious, the environment is good, the hotel service can be rolled up, and the price is reasonable. I think it should be a good choice to visit Zhouzhuang, and I feel it is good overall."
1. The cost performance ratio is good. The location is very good. It is not far from the entrance of the ancient town. Don't drive into the tourist parking lot. Tell the person who stopped the car to go to the Zhouzhuang Hotel directly. The hair dryer is only available when you call.
1, "It's a good hotel with good cost performance and convenient transportation. Many guests of the company choose here."
1. The hotel looks a little old from the outside, and the interior decoration is warm, but it also looks a little old. The price is higher than the hotel's location and four-star rating. The service was quite humanistic, the attitude was quite good. The subway Century Avenue station is opposite the hotel, and the space behind it seems to be built with commercial facilities, which will definitely …
1. The hotel service was very good. On the night of check-in, the plane was 10 hours late due to heavy snow in the south. When I called Ctrip, I was told that I had to use my card carefully to guarantee, but I couldn't do online banking at the airport at that time. Call the hotel and promise to keep the room, which is much better than Ctrip's service staff!
1, "I feel pretty good. The big bed room is a little small, but it is economical. The bed is a tatami type, but Xi Mengsi may not be very good. People who sleep the next day have a sour waist. Two bottles of water and some small things are also good. It is also convenient in the center of Haining."
1. The customer said that the overall feeling was good. Next time he comes to Shanghai, he should choose here
1. Very good service, worthy of being a four-star hotel and a Marrito chain hotel. The service was very professional
1. I booked a room for the customer three times, I felt it was very good. I will choose this hotel next time.
1. "For a 4-star hotel, luxury rooms are expensive and the rooms are too stingy. The service of the hotel is not bad, because there are very few luxury non-smoking rooms. After discussion, they agreed to upgrade the rooms for free. But for 4-star hotels, the price is a little expensive. It's better to stay in a 5-star hotel like Sheraton."
1. "The domestic five-star hotel has a very good geographical location, but the price does not match the room price. More than 1000 luxury rooms"
1. For the first time, I didn't expect that there would be such a garden style hotel in the urban area. Building 5 is the innermost, which should be the best room. It's very quiet. There are mountains outside the window of the room. The air is very fresh. When I entered the room, I found that the windows had been opened for ventilation, so the air in the room was rare and fresh in ordinary hotels…
1. Check in at 11:00 pm. Building 5 is really far from the front desk. I went there with my luggage. Just one minute after entering the room, the lady called. It's so fast! Check out in the morning and find that the hotel environment is good. And the swimming pool. But breakfast doesn't match the 4-star level.
1. The executive big bed room we ordered is very well decorated, but the bed is a little small, and it is crowded for children to sleep together; And below the window is the equipment room, which makes a loud noise after opening the window. The service attitude of the hotel and Ctrip was very good. Because of the connection problem between my friend and me, the reservation was modified twice. The…
1, "This is a very good hotel. I stayed in a standard big room, 388 for one night, which is very valuable. I need to make a suggestion that the floor drainage in the toilet is not good enough. After flushing, the water on the toilet floor does not flow away. Finally, I can't use the bath towel as the floor... The Chinese food is good, and the bed is just a cool word. It's super large!"
1. The lobby environment of the hotel is good. The room price of 358 is still worth the money. The check-in was very fast and smooth. What makes me feel bad is the arrogant and indifferent attitude of the waiter at the front desk when checking out! Maybe this lady is not in a very good mood. She sighs and is impatient with me, but her attitude can be compared with that of a five-star hotel when t…
1. The hotel facilities are OK, the breakfast is OK, and the road section is also very convenient. We live in a business computer room, which is equipped with computers and has fast Internet access. The room is very small, and the computer desk is very close to the bed. You can't even walk when you play the computer. The bathroom is transparent and suitable for couples.
1. A European style hotel. The lobby is magnificent, the rooms are also good, and there are fruits and coffee. "Merrill Lynch" restaurant is very famous in Shanghai. I specially went to have a taste of it. It's really good. You can give a discount of 8.8% with your room card. There is a bar on the west side of the lobby on the first floor. I sat down with some friends for a while in the evening. …
1. I ordered a big bed room. The room is big enough. If there is no other need to sleep, it is enough. The bed is comfortable. Washrooms are all available, but they are poorly decorated. The service provided by the hotel staff is 80 points. Don't compare it with four-star five-star service. It costs 18 yuan to take a taxi to Hongqiao Airport, but when I came from the airport, the driver made a de…
1. A very good hotel, suitable for business and tourism. It is close to the Central Ring Road, with convenient transportation. I like the hotel environment. The lobby is very stylish, and the iron furniture in the room is also very stylish and elegant. The hotel service is as good as what other netizens said, the room price is also reasonable, and the catering is really good, which is worth recom…
1. It's a very good hotel. Breakfast is very rich, and fruits and snacks are delivered in the evening. The service is also good.
1. There were too many harassing calls between 10 p.m. and 4 a.m., and I often couldn't sleep. I reported to the front desk, but it didn't work!
1, "Actually, it's not bad. Maybe there are few hotels I stayed in. At least this one is good in my hotels. Unfortunately, the TV set is too big... If you have sufficient funds, you can consider changing the rear projection... and the carpet of the room can be changed in a better color... The service is still very good!!! This is certain that the hotel feedback on May 15, 2008: Thank you for your…
1. The location is good. It's very close to Tinian Temple. It's just that the small garage on the front is not convenient for parking. The service is good, the room is clean, the swimming pool is suitable for children, and the breakfast is also good. As a four-star, it's cost-effective
1, "The room is in good order, but I can't see that it was renovated last year, including the equipment and facilities in the public area. Maybe the maintenance was not up to standard. The service staff are in good condition, the waiter at the front desk is more friendly, and the fruit given as a gift was actually two pears. The overall feeling is average. It is not up to the standard of four sta…
1. The actual room is a deluxe single room, which is great. The room is quiet and the bathroom is large. It's comfortable and tidy on the whole. I'll stay next time
1. I booked a standard room and gave 368 rooms. I thought it was pretty good. The breakfast was very rich.
1, "The location of the hotel is convenient to travel. The Chinese and Western breakfast is very rich, but the closing time is a little early at 9:30. The deluxe single room is not bad, and the space and facilities are also reasonable. However, some of the facilities in the room are slightly outdated. Additional comments: February 29, 2008 The network cable is used "
1. In Zhengzhou, the Great Wall Hotel is very cost-effective. The Chinese and Western breakfast is very rich, and the rooms are also good. Remember to book a deluxe standard room, which is only 10 yuan more expensive than the ordinary standard room, but the rooms are too large to be oppressed. It's great to see the night view of Zhengzhou on the high floor. Disadvantages: 1. There is no parking l…
1. The hotel is conveniently located. The service was quite attentive. The room looks a little old. The room price is reasonable.
1. The Great Wall Hotel in Zhengzhou is one of the best hotels I have stayed in so far. I always get a greeting inadvertently. I feel very good.
1, "I got engaged to my husband there last Saturday and stayed there for one night. Overall, it was very good. My friends were also satisfied. The main thing was to have breakfast. The breakfast was really good. There was almost all Chinese and Western breakfast. Anything you wanted to eat was OK. The environment was also good. The service was quite good!"
1. I live in the newly renovated east building. I feel that the room is very spacious and the facilities are good. It's not bad compared with the Shangri La store next door. However, other aspects of the hotel, such as the environment and food varieties in the lobby and western restaurants, still need to be improved. Otherwise, the price difference is not too far. I might as well live in Shangri …
1. The transportation is convenient. The food in the restaurant is good, but it is small. You should make a reservation during busy hours. The price is reasonable. I will stay here next time! Supplementary comments on April 11, 2008: When swiping the card, the domestic card could not be swiped out, but the foreign card was swiped out. Strange!
1. Not bad. Because I ordered it for my friend, I haven't heard anything bad. Overall, I felt it was fairly good
1. Two standard rooms have been booked, which is generally satisfactory. Breakfast was pretty good. The front desk service was also very good.
1. The hardware and software facilities of the hotel are OK. The transportation is also convenient. The restaurant on the second floor is very delicious, but the price is not cheap. The breakfast is also OK
1. The hardware is OK, but the software needs to keep up. Convenient transportation and complete entertainment facilities
1. It's very good. The transportation is very convenient. It's just in the downtown area. It's also very convenient for entertainment. The price of Ctrip is not very favorable.
1. This time, I felt that the atmosphere of the hotel was very strong, and the variety of breakfast was "rich". Unexpectedly, when I left, the hotel had a shuttle bus to take me to the airport for free, and the "golden key" on the bus introduced the airport shuttle bus to me in detail. It is specially released here, hoping to give a reference to friends like me who often travel to Rui'an on busin…
1. The transportation is convenient. The price is relatively low near the International Exhibition Center. It is appropriate to participate in the exhibition and stay here. The front desk of the hotel made a mistake about my reservation information in Ctrip and refused to admit it. The quality of the service staff was a little poor.
1. In short, is the room OK? It's bigger than Wanda Holiday. However, the Ice and Snow Festival was expensive at that time, and I didn't think it was so cost-effective. Usually, the house price in Harbin is generally around 400!
1, "The overall service was pretty good, but the sheets were not replaced the next day, which was a fly in the ointment. The price was OK"
1. I stayed for three nights during the Spring Festival. On the first day, the front desk was arranged at 2305 (big bed), and the room on the same floor was the smallest. The next day I changed at my request. The overall feeling is that the hardware is average, relatively old, and the house price seems expensive. The carpet in the room was spotted. The hotel is in a good location. The service was…
1. The room is quite large and the service is good. There are few things for breakfast, the toilet in the bathroom is often blocked, and the response is fast after the repair.
1. During the Spring Festival, the house price is a little high, but it's worth it. The hotel has complete facilities and the rooms are clean and tidy. The service staff had a very good attitude and worked enthusiastically. The location is a little inconvenient. It is about 10-20 yuan to take a taxi to Central Street, Ice and Snow World, Sun Island and other scenic spots. From the airport to the …
1, "The service was quite friendly, the facilities were quite complete, but unfortunately the room sound insulation was not good. In addition, the Shanghai food restaurant only changed the food quantity to Shanghai, but the taste was still very thick"
1. The sound insulation of the room is not good. Other aspects are quite good. Unfortunately, I arrived in Harbin on the day of my arrival, and a large number of taxis were taking a rest. Therefore, I was satisfied with the location of the hotel
1. Not bad. The standard room I stayed in was 368 yuan. The bathroom was very large and the facilities were quite complete. There were some water heaters. Although the bed was not a big bed, it was just right soft and hard. I had a good sleep. However, it is normal for a massage lady to make a harassing call.
1. The hotel is good. The room is very large. There are not many one-way buses outside. The transportation is convenient. The disadvantage is that the breakfast is poor. It is worse than the worst guest house. Don't go out in the morning and turn left for 200 meters. There is a breakfast stall that is good
1. I felt it was OK. It belongs to the kind that has neither surprise nor disappointment. I booked it on the 13th floor. It's quiet, but I can't get cold water. I can't take a bath.
1. Convenient location, good internal environment and sanitation, but slightly higher price.
1. The air conditioner is too noisy... You can go to Nanxiang Steamed Bun for breakfast (walk 100 meters left when you go out).
1. The service is good and the location is convenient. It's very convenient to take the subway and go to Hongqiao Airport. The facilities are a little old, and the sound insulation is not good. The room is quite clean.
1. It's good to stay in such a hotel at the price of Shanghai. I live in a standard room. The room is very spacious, and the hygiene is also good. There is a Nanxiang Xiaolong at the intersection not far from the left turn. It can provide breakfast, lunch or dinner. It's convenient to walk straight to Jing'an Temple for about 15 minutes.
1. I'm really glad to come to Guangzhou this time. Fortunately, I booked a room in Ctrip in advance. Originally, Ctrip helped me book a standard double room in the New World Hotel. However, due to the American Fair, the business of this hotel is very good, and the standard rooms and business rooms are full. As the front desk of the hotel asked me to check in alone, they upgraded me to a deluxe ki…
1. The location of the hotel is close to the subway. It is convenient to get out of the railway station. On the day of check-in, because the ordinary rooms we booked were full, we upgraded the hotel to a superior room for free. For those with computers in the room, you can access the Internet for free. However, the service of the tea restaurant downstairs is a little poor. If you see a stranger, …
1, "It's very good to see the comments of New World on the Internet! So I chose this hotel for this business trip. I personally experienced it and felt it was very good. The 270 yuan business double room is not only free of Internet access, but also includes breakfast, which is worth it! The hotel not only has good service, but also has clean rooms. The geographical location is good, in the city …
1. "Near Jinqiao Development Zone/Biyun Community, it is very convenient to take the Outer Ring Road to Pudong Airport. Ctrip's price is very high, the room is a little small, and breakfast is very ordinary."
1. Generally speaking, I like Sofitel very much. I didn't want to live in Sofitel this time because of the Tibetan independence incident, but the guests like it. I feel good overall.
1. During the Spring Festival, the room hardware facilities are very good, the breakfast is quite abundant, and the service attitude and other aspects meet the star standard of the hotel. Except that the location is in Pudong, it may not be suitable for sightseeing, and it is a very good choice to stay in business or visiting relatives.
1. In Jiangdi, the only problem is that the transportation is not convenient
1. The room provided for this stay was satisfactory, the service was patient, especially the food was delicious, the steak was of a professional standard, and the Christmas atmosphere was good.
1. Everything else is OK, but the room provided this time is not good. The window is only a few centimeters away from the wall. You should greet the guests in advance to explain, otherwise you will be very depressed.
1, "For the level of executive suite, the room is small and the toilet facilities are too simple. There is an exhaust pipe of the building's central air conditioner under the window, causing exhaust gas to enter the room after the window is opened. The executive lounge on the executive floor looks very simple. Additional comments on November 5, 2007: the lobby looks very beautiful, the scenery ou…
1. It's a good hotel. It's a little far from the city center, but
1, "It's not like a hotel, it's like a government guesthouse. When I returned to the hotel at 10 o'clock in the evening, there was no food and beverage supply. It was inconvenient to take a taxi. I had to walk 3-5 minutes to the street. The facilities were old. The list at the time of checkout had to be printed in the business center, which took a lot of time. Supplementary comments on March 11, …
1. It is very suitable for living, with a quiet environment and a good service desk. I'm satisfied
1. The room is newly decorated, with good facilities and environment. Because Zibo people are too enthusiastic and drink too much, they lost their electronic room card and lost 100 yuan. It seems that the price is a little expensive. The house price is only more than 200 yuan.
1. The hotel is close to the railway station and the transportation is convenient. In terms of software, the service attitude of the hotel staff was very good, and everything was answered promptly. The hardware advantages are that the room is spacious, the facilities are OK, and the bath water is also very large, which is very comfortable. The only disadvantage is that the bathroom is a little sm…
1. "This hotel is in a very good location. It is very convenient for me to go on business trips, either to the administrative department or to the client company. The service attitude of the staff is also very good, and the efficiency is very high. I think this hotel is very new, but it is still being renovated, which shows the importance of the hotel and the strength of the group."
1, "The first time I checked in this hotel, I felt very good at first. Later, I found that the air conditioner was not cold. It turned out that a cooling fan in a single room did not work. Although the maintenance was urgent, I had stayed in a room with only ventilation and sweating for a day. But I think it should be a problem in the hotel. They should book and check in time. When I checked in, …
1. I am used to staying in this hotel every time I go to Hangzhou. The room feels a little old this time. I heard that the hotel is being renovated part by part. I hope we can live in a newly renovated room next time. The hotel provides pillow packages. You can choose several different types of pillows, which are quite distinctive. The bed is very comfortable, not too soft or hard. Hotel feedback…
1. I changed my schedule temporarily in Yiwu, so I called Ctrip in the early morning. I was impressed that everyone gave a good comment on this hotel, so I made a reservation. The next day, under the guidance of GPRS, I came to the hotel. Although I took a detour, it was still easy to find. The Red Star Theater is not a cinema, it is a performance, but it did not perform in the third day of the y…
1. The facilities are old, the sliding door of the wardrobe is broken, and the TV set is small. It happens that the hotel is in the process of reforming the cable TV network, so only 4 or 5 channels can be received! The soundproof effect of the room is very poor. The advantage is that the transportation is convenient. It takes about 15 minutes to walk to Golden Street.
1. The transportation of the old four-star hotel is very convenient. We drove along the Shanghai Hangzhou Expressway to get there within a short distance. I ordered a 490 deluxe king size room. The room is quite large, but I don't know why the bed is short. It is shorter than the average big bed. If the boy is more than 1.8 meters, he may not sleep well. There are many kinds of breakfast in the h…
1. Not bad. I will consider staying next time. The transportation is also convenient, and the food in the restaurant is also good.
1. The hotel is pretty good, overall. There are two disadvantages. 1. The Internet speed is very slow for some reason. If it is a relatively large file, it cannot be sent out, let alone the next movie. 2. There is always some channel interference on the TV. Anyway, I didn't watch much TV during my stay. The above two shortcomings were found by the waiter, but they were not resolved. The waiter ju…
1. It's OK. The hotel's facilities are quite complete and the service is also quite good, but I can't see the West Lake in my room, 55555555
1. The front desk of the hotel on October 3 was upgraded to the executive room for free. I felt that the hotel service was good, but it was a little expensive during the holiday in the tourist city, but it still had an advantage over the price of the same star hotel in Hangzhou!! I will stay in this hotel in the future!
1. Although the four-star hotel is a little old-fashioned, it is still very clean and beautiful. The price of breakfast is also relatively cheap, but the price of extra bed is a little expensive!
1, "The waiters in the lobby are very friendly and feel at home. In addition to the computer, the business room has a multi-function fax machine, which can copy documents and send them in the room. It is very convenient. The use of the room computer will charge you, but the Internet is free and fast. The computer engineer is very professional and efficient, and he helped me solve some problems in…
1. A good hotel. There are several advantages. First, the transportation is convenient. It is within 5 minutes from the subway and bus stop. It's only 15 minutes' walk to Tian'anmen Square. It's not difficult to find the location. It's my first time to go there. I found it without asking the way. Second, the room is clean. Because it seems to be newly decorated, the room is clean and tidy, and th…
1. Apart from the poor sound insulation, the room is small, and there are no towels, everything else is good. Besides, it is very convenient to travel, whether shopping or doing things.
1, "This time it was for my colleagues from abroad. Because my colleague appointed a hotel near Wangfujing, I chose this one after comparing it with many other hotels on Ctrip. I didn't go there before, and I was worried after booking. But after checking in, my colleague said that the waiter's attitude was very good, and the room matched the price. Although it was in the decoration period, the sm…
1. Very good. However, the broadband charging system seems to be imperfect, and sometimes mistakes occur. Hopes it can be improved.
1. Because it is to participate in the exhibition in the exhibition center, this one is ideal. Take a taxi along Jinshui Road to the exhibition center. The foreigner was quite satisfied with the hotel. Naturally, the price is not low. What's a bit of a fly in the ointment is that breakfast is cooked in the sunken space in the lobby, which is full of flavor. Maybe some people don't care, but I don…
1. The lobby is not as gorgeous as other hotels, but the rooms are good and the transportation is convenient
1. Students work nearby and recommend hotels. On the whole, it was OK. In the evening, there was a lady in a white dress standing beside the elevator to greet the guests. The dress looked like a wedding dress. If there was no bridegroom next to her and she didn't have her hair done, I really thought she was there for the wedding banquet. There are fewer choices for breakfast.
1. The hotel originally booked a three room room in Tianhe Jade Hotel. The hotel said that it added two beds to a suite. It was very happy. When I went in, I found that the equipment was very poor. There was nothing in the suite hall. The bathroom was dirty and the room was poor. So I ran out quickly. The three people checked for a long time and ordered an extra bed in a suite with good luck. The…
1. The breakfast in the room was pretty good, which was proportional to the price. It's quiet too, maybe that's it
1. It is said that it is the best hotel in the local area. The price is relatively expensive. The room is very small, the floor is not high, but it is relatively large. The distance to the room is a little far. The service is relatively average. The decoration of the breakfast hall is quite distinctive, and the breakfast is OK. The hotel is nominally five-star, but the room conditions and service…
1, "The building is not high, but people with too many turns and a weak sense of direction sometimes can't turn clearly. The scenery is good near Shishan Park, and you can climb the mountain even if you get up early."
1. It can be 4 stars. The bottom of the swimming pool is bigger, and the water is not clear. Broadband is as slow as an ox. The quality of breakfast is not high.
1. Overall, I think it's OK, but I don't think it's very cost-effective! It would be nice if the price could be lower.
1. I have lived there several times, and I think it's pretty good overall.
1, "The environment is very good. It should be counted as a better hotel in CIXI. The cost performance is also fairly good."
1, "It's very convenient to stay in the city center. The park and riverside are next to it. The scenery is good. It's a place to take peace from chaos! The room is fashionable, and the bed is the most impressive one. It's so comfortable that you can fall asleep when you lie down. The dinner is a western buffet. The light shining on the glass curtain in the night is like a star. It's romantic like…
1, "I feel it is more worthwhile to stay in the Hongbin Building guest room than I did some time ago. I found that the carpet in the corridor was replaced beautifully. It feels like a high star hotel. In addition, broadband Internet access is available in all rooms. I like living in such a hotel that is making progress."
1, "It's a very good hotel, which is the best in the local area. The room facilities are quite good at this price, and the breakfast tastes and varieties are also very good, especially the atmosphere of the hotel is absolutely superior to other hotels in Linhai, which is very good. Additional comments on July 9, 2008: a very good hotel, which is the best in the local area. The room facilities are…
1, "The breakfast here is the worst one I have ever seen. There is basically nothing to eat. I saw the waiter adding porridge without listening. I won't stay here next time I come."
1, "I thought it was pretty good on the whole, although the price was relatively high. On the second night of my stay, the indoor temperature rose to 26 degrees. When I asked the service center of the hotel, they said it was cold outside (about 14-17 degrees) , now the air conditioner only has natural wind~~~I said, it is cold outside, but the indoor temperature is so high without windows. How ca…
1. I have stayed in this hotel for many times, including business standard room and luxury standard room. The business standard room is more comfortable than the luxury standard room. There is a big shower, but the bathtub is not very clean, so it is useless. The hotel service was also very good. The MM in the foot bath is also very good, they are very beautiful. Breakfast is average, make do wit…
1. The cost performance ratio is relatively high. It is a good hotel in Linhai, and the old hotel has been renovated
1. The old hotel was renovated. Generally speaking, it was OK and cost-effective
1. The administrative room is really good, the service is good, and the room is comfortable. The price is really high
1. The transportation is very convenient. You can take the subway directly from Luohu Railway Station, and you can leave at the Window of the World Station. The room is clean and the balcony is large. My favorite is the swimming pool, which has the characteristics of Venice. The children like it when they go there. There are fresh apples to eat when checking in and checking out!
1. Good geographical location! The service provided by the front desk and doorman was of a very high standard. But the room arrangement was a bit inappropriate. I ordered two high-end rooms, the same price, but different room types. The washroom for one was very small, and there was no balcony. The washroom for the other was twice as large as this one, and it had a balcony! In addition, when I ch…
1, "Very good hotel. The service is also very good. I stayed in an executive deluxe room, which is clean, spacious and comfortable. I can see the panoramic view of Splendid China from the opposite side. I can also see the fireworks there in the evening. It's beautiful. It can also be extended to check out before 4:30 in the afternoon. I will choose this hotel next time."
1. I stayed for two days on the weekend, which was really good. The lobby was quite distinctive. The doormen wore hats representing the Venetian style and the service was very warm, which reminded me of my days in Venice; There are (snakefruit) apples at the front desk for guests to taste, and we just ate a few, hehe. The guest room is just average. It's not big. The bathroom is also small, but I…
1, "Good hotel, good OK"
1, "The price is not cheap, but it's really worth it. The room is fragrant, which can afford the price of 5 stars. I won't say much about the rest, ha ha"
1. I have stayed in this hotel several times and feel it is very good. The waiters are friendly and professional. The rooms are stylish and comfortable, with complete supporting facilities, and are very convenient to use. In short, it is a good choice to come to Zhengzhou and live in Sofitel.
1. It is located in the Overseas Chinese Town, with beautiful environment and large rooms. The service should be further improved according to the five-star standard
1. The hotel, service and facilities that I often stay in are ideal, and I will go again
1. The hotel's facilities are not bad. The lobby is decorated in an elegant manner. Although the rooms are not luxurious, they have all kinds of facilities. But it's annoying to see that there is a free 100 yuan dining coupon for hotel booking, but you can't give it away without asking. Because of this discount, we went to a western restaurant for supper, and spent nearly 300 yuan (things are too…
1. Overall, I felt it was pretty good. The room is small enough. Very cost-effective. The position is slightly off. There are parks, supermarkets and KFC nearby.
1. Except that the sound insulation effect and sealing of the room door are not strong, everything else is pretty good. Once again, I inserted a card in the power supply slot and remembered it when I arrived in Beijing. Call me quickly and tell me that the waiter has put it away. I found it when I checked in a month later, thank you!
1. "It's economical. Breakfast is OK, but it's a little far from downtown."
1. The location is good, and there are restaurants, supermarkets and other facilities around, which is suitable for long stay. The room and price are basically acceptable. My requirement is to sleep well and be safe. It can be achieved. Later, I compared similar hotels, which were a little expensive.
1. "It's hard to find the hotel. The environment inside is OK. It's inconvenient to take a taxi."
1. I was very dissatisfied with the hotel apartment I booked at the beginning. Although CHECKIN has gone, Ctrip's staff still helped me negotiate with the hotel to return it for free and change it. Because it is required to be close to the New Light World. The lobby of the hotel is very beautiful, and there are also ancient Egyptian goddess statues, three big ones! As far as the lobby is concerne…
1. The traffic is OK. It's convenient to take a taxi. The room is a little small and looks rather old. Among hotels of the same price, it is not very good in Beijing. Breakfast was awful.... The doorman was very friendly and praised one
1. The location is very convenient, the room is very comfortable, the service is also very good, but the price is not cheap!
1. The location is very good. It's very close to the bar street in Houhai. It's very convenient to go to the bar at night. But the hotel facilities are relatively old, and the hair dryer in the bathroom of the room is actually broken. I live in a business computer room. The so-called business computer room has a monitor and a keyboard. If you want to surf the Internet, you still need to bring you…
1, "The room is very small, and others are OK. Although the name includes holidays and gardens, it is not the same as Holiday Inn and Garden Hotel. The room is very small, almost like a snack bar: almost everything is charged, be careful. Breakfast is very simple, very simple. In general, like most Beijing hotels, it is nothing special."
1, "Although the appearance is not very conspicuous, the interior room is very good, and the service is also very good:)"
1,1. The interior decoration is pretty good and looks very distinctive. 2. The hygiene was OK, but the room was a little small. 3. The most important thing is that each room is not soundproof, and the cough in the next room can be heard. It's terrible.
1, "The outside is not very impressive, but the interior decoration is OK. The living style is tatami, which is quite novel. But the problem is that there is no free water in the room. No matter how much you drink, a small bucket of pure water costs 6 yuan in Kaifeng, which is a big problem."
1. The room facilities are good, the service is up to standard, and the location is good
1. "The geographical location is not good, the service attitude is average, the room is open, and the sports are ordinary"
1. Sightseeing king bed room, stayed for 2 nights. The location of the hotel is very good. It is less than 10 kilometers away from Hongqiao Airport. It is convenient to travel and call a car. It is said that it is a hotel used for training of the National People's Congress, with a three-star standard. The service was fairly good, but the toilet facilities were quite old, the water in the shower w…
1. The room is OK, the Internet is good, and the nightclub business is also good. Only this time, when I paid the deposit, I used my credit card to pre authorize the settlement. It was the result of cash settlement. The pre authorized amount was not returned to me. After receiving the bill, I knew that the credit limit was frozen. The guest feedback was June 27, 2008: Thank you for your comments.…
1. When I went to Changzhou, I basically stayed in PetroChina. The transportation is convenient in the urban area. The breakfast and rooms are very good. I will continue to stay in the future. A nearby road is under construction recently. It may be noisy at night
I stayed once in November. 1. The service was pretty good, the doorman was very active. 2. The room is a little old. 3. There are a variety of breakfast. 4. Generally speaking, as a 4-star hotel, it is not enough, but the price is very affordable.
1. The service attitude was very good, hehe, and it was very close to where we went. It was very convenient, and the environment was also very good. I hope I can stay there next time
1. The second time I checked in, I felt it was OK. But all three foreigners said the bed was too hard. In addition, the construction outside was in progress, and the machine was very noisy, so we changed the room at our request. Breakfast and buffet dinner are average. If the price of 5-star hotel is too expensive, you can consider CNOOC.
1. The hotel environment was good, the service was good, the doorman took the initiative to do his duty, and the breakfast was rich in varieties, but the room facilities were relatively old, the indoor air was not circulating and there was a smell. At the time of checkout, I was informed that CCB Long Card could not complete the pre acceptance, which hurt my pre acceptance by the end of the next …
1. The surrounding environment of the hotel is average. The facilities in the hotel are good. I feel it is very new and the price is acceptable.
1. I checked in on May 30 and checked out on June 1, but what was more outrageous was that when I went out on business on May 31, I came back to find that my room had been checked out. At that time, I was extremely depressed and the hotel was also very puzzled. Fortunately, I didn't put any personal belongings in the room. Fortunately, the emergency plan of the hotel was good, and I sent a piece …
1. The room is clean and tidy, and the location is good. It's just a pity that there isn't an elevator
1. The ordinary standard double room is reserved from Ctrip at 250/night, which is quite competitive in the area near Shanghai Railway Station. The room is very clean, the facilities are quite complete, and the bathroom has a transparent design, which makes people feel good. The waiter was very polite and answered all the questions. Free breakfast for two people is provided. Although there are no…
1. It is very close to the railway station and subway station. There is a shortcut to the north exit of the railway station. It is convenient to get familiar with it. The room was decorated very well. The room was a little small. It was enough for business trips. The service was very good. Breakfast was a little simple. It's close to the school. From Monday to Friday, it's more than seven o'clock…
1. I checked into the standard room of the hotel on June 5, 2008. The decoration is very unique, the facilities are also very good, and the front desk service is very good. There are not many kinds of breakfast, but it tastes good. The steamed stuffed buns with mushrooms are memorable and the price is reasonable. However, the hotel room rate is slightly higher.
1. This hotel is exquisite, and the service is particularly good. Although the breakfast is few in variety, it is delicious. Although the room is small, it has complete facilities, good sanitation, and comfortable living! It is very close to the railway station, there are several supermarkets nearby, and there are snacks at the door. It's very good! 5 points! Compared with this hotel, the "Hangzh…
1, "I stayed in a luxury room. The hotel environment is very good, the service is good, and the food is passable. The breakfast at this level of hotel is full, and the location is also convenient. The only inconvenience is that the Internet is charged at 30 yuan. I feel very inconvenient. Next time, if I just pass by for one day, I will still stay here. If I stay for a few days, I will definitely…
1. The house price is clean and the facilities are quite complete. The price is not cheap. On the whole, it's pretty good
1. Little change compared with a few months ago. Meals are convenient and affordable. Rooms are clean and tidy
1, "The room is good, the facilities are passable, I feel that the decoration of the corridor is very distinctive, and the service attitude is also good."
1. Very good overall. The room design is very reasonable, especially with beautiful bathrooms. The hotels in Shanghai are always designed delicately and thoughtfully. The restaurants downstairs are also very good. They are cheap enough to use room cards and can also offer discounts. It is also very convenient to go out. There are subway and some big stalls nearby.. The only thing that is not idea…
1. The location and location are very good. It is quiet at night and the facilities are complete. It is suitable for general self-service tour.
1. There was no pornographic phone, and the service attitude was OK. I arrived at the hotel very late and wanted to eat. The meal time in the hotel has ended. Then I asked the waiter to buy food for me. Three dishes, one soup and one box of rice cost me 120. It's expensive, but I can bear it. It's just for one night. I hope the waiters can improve their professional ethics and don't mess with oth…
1, "The room is newly decorated. As a gold card member of Marriott, I have upgraded free broadband and free breakfast, which is much better than Wuxi Wanyi. There are not many smiling faces at the front desk, but compared with the previous one, it has made much progress. Please encourage me."
1. The flight is late in the evening. The hotel does not provide service after 22:00. You need to pay for the airport pickup. The reserved room is not available. The hotel has been upgraded to a suite. Very big, very good. Maybe I arrived at the store too late and didn't hear any planes taking off or landing. If you change planes in Beijing, the blue sky is good.
1. The airport pickup service was very good, but Ctrip didn't include breakfast. The 488 room was pretty good. Overall 4 points
1, "The lobby is clean, the rooms are clean, the facilities are complete, the location is convenient, the breakfast is OK, the service is also good, but the environment around the hotel is not good, but this has a lot to do with the overall environment of the old city of Nanchang. It is still a hotel worth staying in Nanchang."
1, "The location is very good. At the junction of the new area and the traditional urban area, although it is an old hotel (more than five years), the room facilities are still good, but everything was OK two days before we checked in, and we didn't tidy up the room the third day. We had to call to arrange it. Is that the rule?"
1. The hotel is OK, and the breakfast is also good. It is worth recommending. It would be better if the price could be lower.
1, Attention!! Only the 6th and 7th floors of the hotel have been redecorated (the carpet is dark gray). Everything else is old. When we went out, we asked to see the room. The front desk arranged us to see the sixth floor. It's a good decoration. The carpet is new. There is no peculiar smell. But the fifth floor is the KTV of the hotel, which is very noisy. But you can hear singing and slight vi…
1. Generally speaking, Regal Hotel is one of the most cost-effective four star hotels in Nanchang. The location is convenient, but now the airport bus only goes to Hongcheng Market, which is a little inconvenient.
1. This is the third time I have stayed in the Regal Hotel. The room is good, but I feel it is a little expensive. The buffet here is well known, and local friends will also bring their families to eat. The only disadvantage is that only one breakfast is given in standard double and big bed rooms, and one person's stay is OK. If two people live, they need to buy more breakfast coupons, which is n…
1. The hotels under Marriott are well managed. The hotel environment is also very good.
1. The hotel has been newly decorated. The room is clean and all facilities are in good condition. There are many kinds of breakfast, so there is a wide choice. In particular, the attitude of the service staff was very friendly. No matter where they went, the service staff would take the initiative to greet them and answer the questions in a very detailed way. The passenger station in the hotel i…
1. There are such clean hotels in this small city, not bad! It's really 3-star hardware and 4-star service. It's just that the price is a little expensive. But it seems that all prices in Shengzhou are expensive, and food is especially expensive.
1, "The room in the south building is clean and the location is OK. It is not far from the scenic spots. The starting fee for taking a taxi is enough, meeting the standard of Samsung."
1, "On April 5, 2008, when I stayed in the big bed room in the south building of the hotel, I felt good overall, meeting the three-star standard. What is worth praising is that the room service is very good, the food is delicious, and the price is not expensive. Insufficient: The mattress is too soft, which may be uncomfortable for those who do not like to sleep in a soft bed."
1. The location is very good. We ordered the standard room of the main building, which is just in the south. The canal at night is very beautiful. The room is a little small, and the TV is not very clear.
1, "On the whole, I was quite satisfied. I arrived late (at 19:30) and didn't ask to confirm the credit card. On the contrary, because there was no reserved big bed room, I upgraded it to a suite for free. The room can see the ancient canal, and the lights at night are very beautiful. The hotel is very close to the scenic spot, namely Slender West Lake A Garden. Nantong Road turns 500 meters west…
1, "The room maintenance is good. The front desk service is also good. The room delivery service is very good, and the taste is very authentic."
1. I really like the staff of FOURSEASONS Hotel in Shanghai. They want to be in front of the guests. They are really five-star hotels. Compared with many world-famous five-star hotels in Shanghai, the service and facilities are very good. I have been holding meetings there all the time. The layout of the meeting room is quite up to standard. Every time I think of details that the guests can't ima…
1, "I particularly like the bed in my room, and it's very comfortable to sleep. However, the surrounding environment of the hotel is not good, especially it's hard to get a car. I waited for more than an hour and wasted a lot of time. Additional comments on November 9, 2007: I don't like the surrounding environment of the hotel, which is very messy and dirty, but foreigners especially like it. It…
1. The details of the hotel are good, but the room is not big, the hygiene is very good, and the front desk service should be improved
1. Good value for money. The atmosphere in the hotel was very good. The food in the restaurant is delicious. The room is clean and the environment is luxurious.
1. I stayed in this hotel at the end of August. I was very satisfied on the whole. Except that the location is not in the center of Nanjing Road, everything else is very good. Because it was very difficult to take a taxi in the peak tourist season at that time, I walked for a whole hour in the Yu Garden area on Friday evening to get a taxi like a lifesaver, so I advised everyone to avoid the taxi…
1. Good hotel. The fruit for breakfast is too monotonous. Broadband is directly connected to the telecommunications network, and the speed is very fast.
1. The hotel is reserved through Ctrip until 6:00 p.m. However, I received a phone call from Ctrip at 3:00 p.m. and said that I called the hotel to cancel my room and asked me if this was the case. It's really annoying! Later, when I checked in at the hotel, I asked the front desk if this was the case. They answered very simply. The hotel is too irresponsible, and cancels the reservation of the g…
1. It's good to be here. Look at the publicity materials: national leaders also stay here? Because it was late, the food in the restaurant was almost exhausted, and there was only one cook left. Somehow, they set up a table to eat. Unexpectedly, all the guests were gluttonous, and the wind swept away the remnant clouds. The chef has gone home to pay his respects. After a lot of hustle and bustle,…
1. According to the colleague who checked in, it may be good in Ma'anshan, but the price is not quite affordable, especially the breakfast
After staying in Nanhu Hotel in late March 2006, the hotel was just renovated. The room is spacious, reasonably arranged, and has a glass desk with a desk lamp. Check in again from December 13 to 16, 2007. Broadband is free, and some rooms provide fax machines. Complimentary Chinese and Western breakfast. Chinese food includes soybean milk, bean curd, congee, meat congee Different dishes are chan…
1. I have stayed in this hotel for about 20 times, mainly because I think the location is good and the transportation is convenient. What I find intolerable is that the mattress is too hard for my wife.
1. Hotels in Beijing do not worry about customers, especially those around China International Exhibition. The transportation of the hotel is convenient because it is close to the city railway. The bus from the airport has a stop at the International Exhibition. It is very convenient to eat around. The sound insulation of the room is very poor. The next door can speak clearly.
1. I went on a business trip and generally felt that it was fairly good. Very close to Beijing Exhibition Hall, starting fee. The biggest advantage around is that it is convenient to eat and buy things. When you go out, you can have a special meal -- Crab Laosong, which tastes good. Yanfeng Shopping Mall -- It is convenient to buy things, water and food at a very low price. Every day at the door …
1. The location is good. The trestle is in front of the hotel. Those lucky enough to get up early can see the sunrise on the TV tower on the trestle. There is a bus stop on the opposite road. You can take the 311 special line to Beijiushui directly (the train departs from the railway station at 6:45, 7:45 and 8:30 in the morning. It is recommended to wait for the bus 10 minutes in advance, and it…
1. I stayed for the National Day for a few days, but on the whole, it was OK. Transportation: It should be very convenient. It's close to the Third Ring Road, and it's very close to Guangximen City Railway Station. It's not 10 minutes' walk. It's just that the road is hard to find. Construction is under way near the city railway. The address on Ctrip's short message is seriously wrong. What city …
1. Friendly service attitude, newer equipment! Breakfast is updated every day, good!
1. First of all, the hotel has a free shuttle service, which is very good. However, if you want to contact the hotel yourself, Ctrip's service personnel do not know about this service. Second, the hotel service is good. It will put some candy, cards, etc. It's very considerate. All the service staff in the corridor would greet them warmly. Third, the hotel is in a good location. There are buses t…
1. We stayed in a senior lake view room. The room is really big enough, and the view is also very good. The staff in the lobby are also very warm and considerate. But the decoration in the room is really old, especially the TV should be replaced.
1. A senior lake view room was reserved, and the front desk was given the highest 23 floors. The room was very comfortable, and the breakfast was very rich. I can only see the general scenery of Bailuzhou Park. It may be more affordable to stay in a standard room.
1, "The landscape is good, the service is good, the breakfast is good, the location is good, and it's convenient to go anywhere"
1, "The hotel environment is very good, the service is also very good, the reception at the front desk is very friendly, and even every cleaner will take the initiative to say" Hello "to you "It's a good feeling. My room is in the senior lake view room on the 20th floor, and the scenery is really good. The only regret is that the air conditioner in the hotel only blows out and does not cool. I st…
1. The hotel environment is good. Breakfast is very rich, but the room is small. In addition, the foot bath on the fifth floor is really a paste out. It keeps selling essential oil and has to be done for us in the room. It is suspected of doing that kind of work, but it is also understood that this is an outsourcing project of the hotel and has nothing to do with the hotel. So I really like this …
1, "After staying in two administrative lake view rooms for two nights, I felt that the rooms were a little small, but the design was not bad. The bathroom was much smaller than the four-star administrative room. The TV was also very old and small. The scenery was really good. It was also very convenient to go out for a walk. The service was going to depend on people. When CHECK-IN said that the …
1. It's very good, that is to say, it's an international trade shop, but it's a little off center.
1. I stayed in this hotel when it opened in 1998. I felt very good. I chose to stay here in Qingdao this year. Ten years have passed. Although the hardware is a little old, I still feel very satisfied with the service level
1, "This homelike hotel is the nearest to SOHO Modern City. You can go to the subway of SOHO Modern City after taking a taxi. I went to live for 8 days on business. When I made a reservation, I told the Ctrip staff not to be near the elevator or the end of the corridor, and the arrangements were made when I checked in. The service staff at the front desk were very friendly. When I checked in, I f…
1, "The hotel rooms are very good and warm, and there are several books for guests to read. But there is no sewing bag, so I went downstairs to ask for them. There are few restaurants around, and the Internet speed in the room is slow."
1. Every time I stay in this hotel, I always get a free upgrade, which is very interesting. The room was very good, the service was also very good. I will stay here next time.
1. Personal hotel rating: very good; preference; General; Deviation; Very bad Ramada Fuzhou Meilun Hotel - preference details: A - appearance - 4.0 points, B - service - 4.0 points, C - room - 4.0 points, D - breakfast - 4.0 points Remarks: 01. The original reservation was for a senior room, which was upgraded to the executive floor for free, very satisfied; 02. The consistent style and simplicit…
1. Every time I come to Fuzhou, I live here, which is much more expensive than at the beginning. But I just like their duvet, which is more comfortable than the one I bought myself. I don't know whether the hotel will consider selling the quilt if it is new. Breakfast was also good.
1. The location of the hotel is good, the service is OK, but the decoration is old
1. The service provided by the lady at the front desk was very good. I didn't book a room, so I took the initiative to upgrade to the executive floor for free. The buffet in the hotel is very special. A very good hotel.
1. The hotel is very good, with good location, convenient transportation, large rooms, and breakfast. You may stay here next time you come to Fuzhou.
1. Dalian is a very good hotel, but I almost made a mistake of 0.0 with Nanshan Garden
1. After extensive online reviews, I finally chose this hotel. The business sea view standard room on the third floor is really first-rate, but the sound insulation effect is a little poor. I was originally going to choose Haitian. On the spot, I knew that it was facing the sea vertically, and the rooms were all looking at the sea from the side. The front desk is said to be Xiecheng's guest, a li…
1. The environment is fairly good. The room is not big but not too small, which is enough for living. The floor lamp in front of the desk is too close to the desk. Every time you move the chair, you will encounter it. The other thing is that the sound insulation effect is not good. The noise of cars passing by at night is a little noisy. Everything else is OK.
1. Very satisfied. The environment was very good. There was no harassing phone call at night. It was the only hotel I stayed in without harassing phone calls. Maybe it was the new hotel!
1. However, if the group can get a good price, it is still a good hotel
1. Because I have lived here before, the room is very large, so I chose this place again, but I was a little disappointed. The room is obviously much smaller, much older, and the toilet has a strong smell of sewage. This price is not worth it
1. After checking in, I found that the facilities are relatively new, which is cost-effective compared with hotels with the same price. It shall be counted as 4-star standard. It feels much better than the Hainan Building nearby.
1. This time, due to the need of work, I booked here again. When I arrived at Dujiangyan City, I felt the damage caused by the earthquake. The once prosperous city is now! When I came to Erwangmiao Hotel, what surprised me was that the current situation here really did not feel that the hotel had experienced an earthquake. When I entered the room, I found that the room and the living room were st…
1. The three of us stayed in Oceanwide Celebrity Hotel from July 19 to 22, 2008, and we have seen online comments before. With a try and see attitude and a more professional perspective in aviation service, I truly realized that it is worth the money and deserves the reputation. Whether it is a bright lobby, a hallway on the floor, or a clean guest room, the layout is particularly elegant and com…
1. I went to the Erwang Temple Hotel on May Day. I found a new discovery: Dujiangyan Scenic Area is connected with the Erwang Temple Scenic Area. If you walk about 50 meters from the Erwangmiao Hotel, you can see an entrance to Dujiangyan. You can buy tickets to enter the scenic area. If you travel down the scenic area, you can reach the main gate of Dujiangyan, which is also the downtown area of…
1. The room is a 258 sun king size bed room. The price is completely affordable, and the price is absolutely worth the money. The hotel environment is very good, and the environment in the room is also very good. The fruits are presented for check-in, and the service is also very good. The disadvantage is that the bed is a little short, and the toilet is a little small
1, "I'm from the Spring Festival, and I think it's good on the whole. The hotel is surrounded by woods, and the air is fresh. Although it's a little old, there is still a three-star standard. The service here is good, but it's a little far from the downtown, but it's convenient to take a taxi. The front desk can call a taxi, and you can go to the downtown in about five minutes. My personal opinio…
1, "This is the third time for me to check in, but it is the first time for me to leave a message to this hotel. This time, a friend of mine was drunk and walked into the lobby and my friend" "broadcast live" " "Well, several of their attendants came to help me, and one of them carried my friend to my room. Later, their manager on duty called my room to ask about my friend's situation. I was real…
1, "It is the third time that I have booked this hotel through Ctrip in three years. This time, I was disappointed. The hotel's service attitude is still very good and impeccable. However, the hotel facilities are getting old now. The rooms/toilets, beds, etc. can no longer cover up the traces of the old. There is also a bad smell. It is said that the boss's attention has shifted to the developme…
1. This stay was very pleasant. I stayed in a standard room. The room facilities are perfect and the conditions are good. Especially the hotel environment is very good. Hehe, it's very comfortable to live here, the front desk service attitude is also very good, and the buffet in the morning is also good. But no one helped me with my luggage when I checked in. I carried heavy luggage to the fourth…
1, "The reason for choosing Yueda International is mainly because of its convenient transportation. It takes 15 minutes to take a taxi from the railway station and bus station. The room is clean and tidy. This price is reasonable. There is a park nearby where you can walk in the morning. It is more suitable for people who get up early, and I am satisfied overall!"
1. I stayed in a suite and was satisfied with the overall layout and decoration. The book bar facilities here are very good. Ctrip customers can use it for free. The hotel is close to the place where we work. Because a colleague proposed to eat local snacks, the front desk staff warmly recommended several special places. The overall location and atmosphere of the hotel are good.
1. This is the second time that I have stayed in Yueda Hotel. The environment and geographical location here are not bad. The price, service and the room environment of the high-rise are still very cost-effective. In particular, the bed is very comfortable and I like it very much. In addition, it is very close to the farmers' food street, which is highly recommended!
1. According to the introduction of others, I stayed here for two days, and felt that the overall service was very considerate. The room on the 11th floor was very comfortable. Because of the temporary change of schedule, I called the front desk to book my ticket. The service was very efficient, and it was delivered to the room soon. I felt very good overall.
1, 7/22-7/24, the room is not bad, you can see the whole sea view, and the hotel service is not bad. However, there are still some small defects. The hair of the last batch of residents in the bathtub was not cleaned up, which led to the hair floating up when the water was released, which was very disgusting. In addition, the hotel's catering does not meet the 4-star standard, so there are few ch…
1, "The hotel recommended by a friend is convenient in location and reasonable in price. The room area of the high-rise building is very spacious, and the registration and check-out time at the front desk are very fast. The service is good! It is worth recommending to you. The hotel is diagonally opposite the bus terminal, and there is a large supermarket, which is very convenient."
1. I live in a luxury room, which is very large and has good facilities. It may be near the road and noisy. There are many kinds of breakfast in the restaurant. The price is 35 yuan, which is worth it. The service at the front desk was very friendly. After checking out, we had to rush to Shanghai. The bellboy kept delivering the luggage to the station. The service was satisfactory!
1. The hotel is good, especially near the long-distance bus station (across the road). The food in the hotel is good, inexpensive, and there are many dishes. The opposite is the Quanye Market, so you can stroll around. It is also very convenient to go out to downtown by rickshaw. The disadvantage is that you have to pay 10 yuan for overnight parking in the hotel, which is not very pleasant!
1, "This hotel is very close to the station, which is convenient. When CHECKIN, the service is good, there is also herbal tea to drink, and the breakfast in the hotel is not bad, but at 8:30, there are not many varieties. I stayed in a single room on the sixth floor, and the Internet is free. I am very satisfied! The bed is comfortable, the space is not large, especially the furniture is too dark…
1. The service attitude was very good. From the bellboy to the waiter, they were very polite. They took the initiative to prepare towels and tea for us while waiting in the lobby. In many five-star hotels, there was no such service. Fruit is delivered to the room every day, although the quality is not good. Chinese and western breakfast is very good, with a wide variety. As the room rate includes…
The seascape checked in on the 1st and 8th, and hurried back to the hotel after dinner. The huge sign of "Weihai Hotel" at the intersection of Lianlin Island almost covered the small signboard of seascape. I suggest that the hotel must not save money! Very good service, fruit, tea towels and small gifts were given as soon as I checked in. I really like them. The room facilities are good, but the …
1. Shanghainese are picky. People who work in hotels in Shanghai are more picky. My husband has both. In software, he can't find any problems. What else can he say. The facilities of the four-star hotel are a little old, but the five-star service. We'll know when we have a chance to stay. It's better to drive there. They have free car wash for guests. It would be perfect if they could take the ma…
1, "The location of the hotel is not bad, about 8 yuan from the Liugong Island dock and the Korean city seat taxi; the staff are very polite and have a good attitude; the breakfast is good, Chinese and Western, and there is a lot to eat; the room is clean, but the only regret is that the facilities are old, especially the quilt, which is covered with a quilt cover by the blanket, which is not lik…
1. The hotel service is really good, and the room is also very clean. You can see the sea view from the balcony. There are many boats parked on the sea, which makes you feel. The buffet breakfast is very good, and the variety is very rich.
1. After washing clothes, they hung their books in the bathroom. When they came back from going out, they already hung their shelves on the balcony! Satisfied with the first-class service attitude, I saw all smiles! Although the facilities in Happy Room are aging, they are very clean! The sea view of Anxin is very good! Cool
1. It's a very good location. We live in a luxurious sea view room. Open the window and you can see the trestle and sea view. I remember living long ago, but now I have renovated. Quite satisfied on the whole. Will stay in the future
1. I also chose seascape by comparing Ctrip's user comments, which is my first time to live. Overall, I felt it was very good. The hardware in the room was average but very clean. There were fruits and candy every day. On the first day, I also gave dolls. Children liked them very much. In particular, the hotel service is very considerate, and the prices of catering and car chartering are also rea…
1. "I still feel warm when I check in the Seaview Garden Hotel again. The hotel staff are not less enthusiastic, and the service is still up to standard. Compared with other four star hotels in Weihai, the service is not at the same level. The Seaview Garden is really good, and I will check in next time. My suggestion is that the air conditioners in the hotel rooms are not very cold, and the serv…
1. Very good service. Although the hotel is listed as a 4-star hotel, the service is not inferior to that of a 5-star hotel. The staff of the whole hotel are very friendly. Everyone you see will take the initiative to say hello to you. The hotel also does a very good job in providing detailed services. For example, if you take a seat in the lobby, the staff will immediately serve you tea and towe…
1. It's really good! The location is better. The sea view room faces the Zhanqiao Pier and small Qingdao. You can enjoy the pleasant sea view without going out of the room and crowding among tourists; Breakfast is rich and the environment is good, which is cost-effective compared with its price; The simple meals in the coffee bar on the first floor are not expensive, with good taste and sufficien…
1. Convenient location, cheap price, considerate service and beautiful environment! thank you!
1. Very good hotel. Every time I go to Yancheng, I stay here. The price is cheap and the quantity is sufficient!
1. It's a good hotel. It's very convenient to eat and travel. The service attitude was also quite good.
1, "It is very close to the long-distance bus station, and the hotel environment is not bad, so it is the first choice next time."
1. "I have stayed in Yingzhou Hotel for many times before, but the quality of breakfast and the varieties I chose this time are improved."
1. The service was very good. It was the most satisfied hotel recently. Very satisfied with both the front desk and the room service. Very good at many details! There is a Korean restaurant downstairs, which is also good. When I went there, because it was the first day, I sent a dish to me. The dishes were more expensive than what I ordered. For the first time, I took the initiative to comment on…
1. Overall good!!!!
1. The first time I stayed in Yingzhou Hotel, I felt very good. The design of classical gardens made me feel quiet and peaceful. To my surprise, there are also Korean speaking waiters at the front desk who can specially receive Korean guests. According to the introduction from the receptionist, Korean food will be introduced soon, and they are all made by authentic Korean chefs. The price is not …
1, "The quality of the waiters is very high, which is better than many five-star hotels in China! The facilities are a little old, but the maintenance is good and clean. The food price is moderate! One night, the workers ground the floor and made a lot of noise. Later, they negotiated to stop the construction. The next day, the lobby apologized and gave a fruit tray. When checking out, they apolo…
1. Every time I come to Yancheng, I stay here. Although it is not the best hotel in Yancheng, it is still a good hotel. The environment of the room is a little shabby, especially the carpet is a little dirty. However, the overall environment and cost performance are pretty good. Additional comments on March 22, 2008: The service attitude was also pretty good. Later, a friend of mine came over at …
1. The hotel is unique and has some garden fashions. The service was of a very high standard. No matter the doorman or the receptionist or even the cleaning lady, they were warm, considerate and considerate everywhere. It's a very warm hotel. The location is good and the transportation is convenient. It is 18 yuan away from the airport (maybe there are so many other hotels). The hotel feels a lit…
1. It's near the long-distance bus station. Walk for 10 minutes. Just cross the road crosswise. In downtown area, there is Ou Shi's western food restaurant at the intersection. The environment is good. The hotel is a standard 4-star hotel, very good. There are also KFC and Agribusiness Supermarket nearby.
1. The location of the hotel is very good, and the scenery outside the sea view room is also very beautiful. You can see Zhanqiao Pier and Xiaoqingdao, and the beach is across the sea. The service was very considerate, I really like the snacks on the floor. The room settings were also very considerate. Although it is not big, it is a good resort hotel. There is a flaw in the beauty. The sound ins…
1. Not bad. The transportation is also quite convenient. Generally speaking, it's OK
1. It is a weak four-star hotel, which is balanced in all aspects and can be considered for tourism and business. If you want to find fault, there are the following points: First, can the price be more favorable? The price of more than 400 standard houses is slightly higher. 2、 The entrance is not particularly convenient and eye-catching. 3、 As far as four stars are concerned, the lobby is a litt…
1, "The overall environment is good. This time, I stayed in a super standard room. The two large French windows in the city are good, and the natural lighting is good. There are also many kinds of breakfast. In addition, the hotel also gives me two cans of Coca Cola free of charge. Although I didn't drink it, I still feel very friendly. It is very close to the city center, you can walk to it, and…
1. Not bad, but the gate is a little small.
1, "This is the hotel I often stay in. The main reason is that I invited my customers to Nanjing. It is very close to our company. The hotel itself is OK, and the price has risen. But the hotel's appearance is not obvious. It is not like a four-star hotel. If you can, you can stay in a central hotel for a little more money, which is very impressive. It is 200 meters away from Guoxin."
1, "My guest said that this hotel is not bad, I haven't stayed in it myself, but he is very satisfied."
1. I checked in on New Year's Day, but I haven't had time to comment. The room is very large. The only thing is that the sheets are very hard, and the arms and back are very painful. But the room is OK. I hope the sheets will be replaced
1. The hotel is very good. The big bed room is very large, and the room is also very large. All the facilities are very good. There are two separate spaces in the bathroom, namely, a bathtub and a shower. The service is also very considerate. The next night after you checked in, you called to ask what you think of the hotel. The Zhanqiao Pier is a little far from the May 4th Square as soon as the…
1, "The location is good. Carrefour is next to it. The transportation is convenient, the room is huge, and it is also very comfortable to live in. The sun can shine on the bed in the morning, so you can wake up naturally. The swimming pool is also good. Especially the restaurant in the hotel is of high standard. The only disadvantage is that the facilities in the room are a little old, but I am s…
1, "The hotel is OK. It has large glass windows. You can sit on the windowsill, taste red wine, watch the city view and see the stars. The room facilities are a little old, but you can stay again. It is very close to the supermarket, where you bought red wine, hehe."
1. For the two sets of rooms booked at the same time, the check-in time is different, and the rooms finally obtained are also different. It's strange that the hotel rooms are always like this tonight. Of course, they are upgraded to higher level rooms.
1. I have stayed three times tonight, but I am not very satisfied every time. The room is too big, but the equipment is old, and the price is not low. The suite I ordered this time didn't even have a dressing mirror. Such a large apartment has a big bedroom, a big customer, a changing room, and a kitchen (only open to long-term customers). It doesn't even have a mirror, but only a half mirror in …
1. The room was OK. When I went to the lobby, there was a sales model of the building. I felt it was not suitable.
1. When I arrived at the front desk at 11:00 p.m., the lady smiled and told me that my reservation for Ctrip had not been confirmed, but it could be arranged for me. False alarm. This is the first stop of the Golden Week, Jinhua on the 27th. The lobby of the hotel is just like what is said downstairs. It is too big and inappropriate, and it is not bright enough. Because it is late, the porter com…
1. The hotel's service attitude and room environment are both good. The original Tianhong Hotel, which has changed its name, now sounds better.
1. The location of the hotel is good, and the room layout is OK. The TV is a bit too much. The toilet is not very smooth. The house price is on the high side.
1. The advantage is that the location is good and it is convenient to go to the Universiade Village or Zhongguancun. Ctrip's price is really not good enough. It doesn't include breakfast.
1. I have stayed in several hotels in Beijing before. Yanshan, Wenjin, Tianhong and other Tianhong are our colleagues' favorite hotels. The rooms are small, the bedding is very soft, and the breakfast is OK. But after I stayed in Wenjin, I think Wenjin's service attitude is better. The doorman is really warm when I leave the hotel
1. I have booked the hotel for my colleagues many times. The location of the hotel is very good and convenient. The room is also good.
1. The hotel has good facilities, is close to Zhongguancun, and the surrounding catering is very convenient. The buffet breakfast is very rich, but the price is relatively expensive. This time, the hotel's service to ordinary guests has declined as the delegation who just caught up with the international judo competition checked in. The hotel lobby is in disorder. Additional comments on November …
1. By contrast, it should be a better hotel here, but the price is still a little high
1. The hotel is good, the rooms are clean and tidy, and the service is also good. I hope the hardware facilities can be improved more. That would be great.
1. The service was very good, and the environment was quite comfortable, but the hotel's catering was average.
1. The five-star hotel is decent, but the double room bed is small, and others are OK. After all, it is also a chain hotel. In addition, the lobby of the hotel really has some momentum!
1. Generally speaking, it's OK. Breakfast is very rich. I don't even have lunch after breakfast. There are no such problems as others said, but the most intolerable thing is that the smell of the room is really bad, it should be the smell of reclaimed water. I open the window almost every day.
1. Remind everyone: The standard room is for two people, and the breakfast is 18 yuan free. Only one person can enjoy it!!!
1. Good service, 10 points for walking
1, "A friend introduced me to choose this place. Last week, a Japanese friend stayed here. Because of his language barrier, the hotel sent a special person to help him buy a boat ticket and send him to the dock to take a boat. It's very humanistic. I'd like to thank Mr. BABA! I ordered a newly decorated standard room. The bathroom is translucent and the room looks very bright. It seems that this …
1. A clean and comfortable hotel is a good choice if you don't have to live in the city center. The breakfast was very rich and the price was a little high. The Sichuan food on the first floor is also good.
1. One word satisfaction. I have stayed in several hotels in Yantai. It's better to contact the hotel in advance for the service here. I hope they can meet me at the airport. The Miss from the front desk promised that I would arrive in Yantai at more than 8 p.m., and the car is waiting for me. When I arrived at the hotel and asked the driver how much the airport pickup fee was, he told me it was …
1. "The room is really big when I stayed in the deluxe king size room. I didn't expect it to be such a big room, such as sofa, writing desk and balcony. I am satisfied with this."
1, 51 I still chose this place, because the expensive ones are too expensive, and the good ones are fully booked. In 51 small gold, the price of 288 yuan is cheap. I called Fengfeng Travel Agency, a small private hotel that someone wrote in my travel notes, and it costs 240 yuan a night. Any fool would choose a star hotel. The K197 left the station at three o'clock in the morning, and the hotel h…
1, "The room is very good. It is also a suite. The front desk attendant is very considerate. Because the floor is less noisy, I didn't arrange a room facing the road for me. The location of the hotel is excellent. It is diagonally opposite the Seven Star Rock Memorial Arch and next to the Overseas Chinese Building. Overall, I am very satisfied. In addition, the corridor on the floor is really lon…
1. Extremely good. One of the best hotels in China. Every aspect was pretty good.
1. The hotel is in downtown Zhaoqing, but the room near the garden is quiet; The corridor of the hotel is beyond imagination, with 96 rooms in one corridor. The suite is beyond imagination, about 15 meters from the door to the bed. Seven Star Rock is like a big park. If it is a good place for urban people to rest, it does not charge tickets (60 yuan). Scenic spots like West Lake do not charge tic…
1, "My friend told me that it is the best hotel in Zhaoqing at present. It is worth looking forward to, because the hotel is big enough, the Chinese restaurant is good, the room setting is good, and the position of the hotel in the Jianghu can be seen. Tell me about the place to discuss. The room price is 370 yuan, and I paid a deposit of 800 yuan as required, so that I can check in smoothly. I h…
1. Good choice. The room is clean, the service is good, the price is reasonable, and the transportation is convenient.
1. The decoration is very new, the facilities are very complete, and the conditions are good. The service personnel have followed the "style" of Beijingers and are "arrogant and not enthusiastic". It is difficult to say "satisfied" with the "service" itself. However, the cleaning sister-in-law on the 10th floor was quite good, and she was very enthusiastic to ask whether to clean the room
1, "1. The room facilities are well arranged, the size of the TV is smaller, and there is still a charge for on-demand movie programs
1. The geographical environment is good, but there are always buildings on the opposite side. It is inconvenient to take a taxi in the street in front of the door.
1. I arrived in Baotou almost in the early morning. There is no special hotel in Baotou. I stay here every time I come, so I don't have much comparison. I feel OK. I will stay here next time
1. Five stars is far fetched. The bathroom is too small, not as big as the four stars of Hohhot Air China. The warm air in the room is given too early, and there is no cold air and ventilation. The hot people are really uncomfortable, so they have to open the window, which is too noisy. In the morning, I had to wait for the waiter to make a room check. It was a three-star service. The four stars …
1. The location is very good. The parking lot is also very large. It is quite convenient for friends who drive to live there. The family room for three is still large and clean. There is a hair dryer, but the central air conditioner is not turned on. There is a vertical air conditioner, but the sound is a little loud. Maybe I am sensitive to sound
1. The location is good. It's very convenient to go shopping in the commercial street. The rooms are also good. They look relatively new, but there are too few breakfast varieties. There will be several snack stalls in the alley next to the hotel in the evening. The taste is pretty good. The grilled squid is very delicious. The friends who stay in the hotel can go to eat, hehe.
1. I wanted to book Hanting, a hotel with a good location. 15 yuan from the West Bus Station, a few steps from Wenchang Pavilion, 10 minutes to the famous Fuman Tower, Golden Eagle International Shopping Center and Times Square. Geyuan Garden, Heyuan Garden and Slender West Lake can be reached within 20 minutes' walk. Five yuan is OK for three rounds. The lobby is spacious, the room facilities me…
1. I spent a three-day honeymoon in Yangzhou with my wife and stayed in a hotel for three days. I felt very good. It is the best three-star hotel we have ever stayed in. The buffet in the most impressive hotel is 10 yuan/person, and there are many kinds! We can eat until we die~Haha, the geographical location is also good, just on the busy Wenchang Road, but I feel how their elevator makes me diz…
1. I stayed for three days last week. The hotel service was pretty good, but I felt a little old. I saw several economical hotels in Wenchang Pavilion, and I felt quite impressive.
1. I stayed for two days on April 3 and 4, 266 yuan/day for double breakfast. The price of Ctrip is average, and the front desk can also get it. The location of the hotel is very good. It takes 10 minutes to walk to the Garden and Slender West Lake. Breakfast was OK. The only problem was that the sound insulation was too poor. I could hear everything in the next room clearly
1. This homelike location is not very good, so I don't think the price performance is very good. I won't go there next time.
1. Not bad, not bad, not bad, not bad, not bad, not bad, not bad, not bad, not bad, not bad, not bad, not bad
1. I have nothing to say except that the price is on the high side. Especially the pure water system in the room shows the humanization.
1. I like Yanchun's big room. Facilities, elevators, lobby and service were all very good.
1. It would be better if the Chinese food were more abundant. No suitable place could be found for eating Chinese food alone. Western food is good
1. Good service, the receptionist was very friendly. The environment is quite good. The park is downstairs. In the morning, I looked around and saw a group of MM doing aerobics. The unexpected result:) The breakfast was much better than last time, and the newly added tomato and egg rolls were very delicious. The Internet cable is too short at night. Within two minutes of making a service call, a …
1, "Because I had to book this hotel to do business nearby, the service this time was obviously better than the last time I came. I hope we can continue to work hard."
1. It should be the best hotel in Yizheng, with four-star facilities and three-star services. Unfortunately, some facilities have not been opened yet. The breakfast was very ordinary, even there was no waiter to collect the dishes, which was not in line with the four-star standard.
1. Not bad. The room is very large, the service is also very good, and the villa design makes people feel very good.
1. "The villa hotel has a very good environment and service. The room is a little small"
1. The hotel environment is good and quiet. I stayed in a standard room for two nights. The room is super large. I have never lived in such a standard room before. However, the carpet is a little dirty, the furniture is not placed properly, and the TV is too far from the bed. Breakfast is not four-star, it's too simple.
1. The environment is very good, the green area is very large, and the service is also very considerate, which may be the reason for the newly introduced economy room. The price is very small, but the personality ratio is very good.
1, "The hotel room is very comfortable, but the front desk can't explain clearly when I call to ask about the hotel location; the restaurant can't serve the casual classes because of the reception team, and it's reasonable."
1. It's a very good hotel, especially for the reception of national leaders. The economic standard room is a little small, but very compact. The bad thing is that the bathroom is all glass. Not very convenient
1. It is divided into five separate buildings, each of which has a different living level. At first, I ordered a standard single room, but in the past, there was only a standard double room. The service was average. They didn't take the initiative to upgrade the customer, but only gave me a standard double room. I changed to a business single room myself, but the smoke was heavier, and I was plac…
1. The environment is very good, and the service is also very good. I recommend staying here next time
1. A four-star hotel with very high cost performance. Especially the Shandong Dahan waiter, the service was very good. The buffet is very good. I highly recommend it to you. The star rated hotels in Qingdao are very formal. Compared with other tourist cities, Qingdao has a very good environment, a clean city, and good taxi drivers, which is worthy of Shandong people.
1. It is the first time that I have lived in so many hotels and met with a yellow quilt. I feel it is not clean; The carpet is black and it feels dirty. The environment was OK, at least there was a yard.
1, "Yes, the courtyard is a little smaller, and you need to walk a small path to the beach. It's strange that all hotels in Qingdao do not have their own beaches."
1. The employees of the Sanaa Center in the hotel earn money from the guests by cheating.
1. "The villa hotel is very special. It is close to the seaside. The consumption is very affordable."
1. This is a villa hotel, which is very special. It's a pity that the road at the entrance is a one-way road, so it's a bit inconvenient to travel. The terrain has a slope and it's very interesting. The interior environment is very good. I like this kind of clean feeling. I stayed in the innermost building, and I can see the garden or something behind. It feels like a paradise, and I feel like tw…
1. Quiet in noise, good value for money. It is the first choice for my next business trip.
1, "The hardware is good. Compared with the room price of 223, it is absolutely cost-effective; however, the soft service still needs to be improved, especially in case of abnormal situations, we should consider the hotel feedback from the guest's perspective. On July 25, 2008, first of all, thank you for your valuable comments. Indeed, due to the large number of new employees in the hotel recent…
The price performance of the 1328 single room is good. The downtown is quiet and convenient. The opposite is China Merchants Bank and the next is the Hongqi supermarket chain. Breakfast was also rich, but some people were auctioning Chinese paintings on their own, although no one paid attention to them. There are many meetings, the elevator is busy, and it is quiet to sleep at night. The switchbo…
1. The location is superior, and the front desk service speed is good. The house between big beds is very poor, with no ventilation and poor lighting. The guest room is filled with peculiar smell. At night, the influence of outdoor subwoofer, telephone interference and sleep is affected. In addition, the cell phone signal in the corner room is not good.
1. "The service is good, the room is also very good, it's convenient to call a car, but there is no supermarket around. In addition, breakfast is not directly proportional to the hotel. First, there are too few varieties, and second, it is difficult to eat."
1. The traffic is convenient, on Hongxu Road, between Hongqiao Road and Yan'an West Road.
1. The West Suburb Apartment Hotel has a high cost performance ratio. I strongly recommend it. I will definitely stay in Shanghai in the future. The hotel environment is elegant, quiet and comfortable. The garden hotel has the greatest advantage of being quiet. It's not worth it. The service is good. I feel very quiet when you don't need it. The waiter is there when you need it. The traffic is co…
1, "The hotel is elegant, quiet and comfortable, with convenient transportation. There is an elevated entrance next to it. The room is equipped with a computer, free Internet access, and free fruit delivery. It is cool! Breakfast is also good, with a wide range of varieties. The service is also very good. It is a very good wine restaurant. Ctrip did not introduce it wrong, and will stay in this h…
1. Quiet, clean, good service. I will consider staying here next time. Additional comments on September 19, 2006: The hotel's computer is a virtual hard disk, and I saved some files but did not expect to restart it! Later, it was found that there is a partition where files can be saved:)
1, "The room and the environment are good, and the five fingered foot health care on the fourth floor can also be discounted by using the room card. It's just that the check-out speed is a little slow! The free registration website navigation hotel index service description About Ctrip's recruitment of talented agents for cooperative advertising business Contact us Copyright1999-2008, ctrip. com.…
1. The hotel is good, but the swimming pool is a little small, 1.5km away from the mouth of Jiuzhaigou Valley. At present, the transportation is not convenient in the off-season, so you can only charter a car to the scenic spots, but the air ticket price is very affordable. The scenery of Jiuzhaigou Valley is good, and there is no sense of security when you go out at night.
1. The hotel is only 2 kilometers away from Jiuzhaigou Scenic Area. There are all kinds of hotels and shopping blocks nearby, making it convenient to travel. The quality of service is very high. There are many kinds of breakfast, and the cost performance is good.
1, "The room is very good, meeting the five-star standard. The hotel is close to Goukou and Bianbian Street, which is the best choice to travel to Jiuzhaigou. Additional comments: July 21, 2008: The earthquake had no impact on the hotel. The hotel feedback: July 24, 2008: Thank you for your comments, welcome to stay in our hotel next time! We will provide you with more considerate services and qu…
1. The service provided by the hotel staff was very good, almost responding to every request. After learning that our plane was late, we always sent a special person to guard the door. Because the room given to us was different from our requirements, the hotel staff immediately tried to help us solve the problem. We were very moved to hear that their financial manager gave us the room. The room w…
1, "We were moved by Sheraton's appropriate emergency measures and sincere service when we checked in on the morning of the 5.12 earthquake! Especially Manager Ding of the Front Office Department, who was really eager to help customers!! Once again, we express our heartfelt thanks! The hotel feedback on July 24, 2008: Thank you for your comments. We look forward to your next visit and provide you…
1. Sheraton Jiuzhaigou International Hotel is a five-star hotel, which is expensive. Although the price of Ctrip has been much cheaper, it does not deserve its name. The main points are as follows: 1. The hotel is said to be at the mouth of the Jiuzhaigou Valley, but it is actually one and a half kilometers away from the mouth. But Sheraton's billboard really stands at the mouth of the ditch. 2. …
1, "I originally booked Sheraton for the first night, but my friend said that we would go to heaven for a stay. We couldn't resist her persuasion, but this was just the beginning of a nightmare. The room had a heavy smoke smell, and the air conditioner was still noisy. I told the waiter to change the room, but after waiting for half a day, I finally changed a mountain view room for us that looked…
1. Except for the hard chocolate cake in the coffee bar, other services meet Sheraton's standards, making you feel at home.
At the end of January and March, it was a senior room. The bed is very comfortable, but the TV is a bit out of date, not LCD. The attitude of the waiter was very good, and because it was close to the ditch, it should be the first choice to go to the ditch for a few days.
1. The location of the hotel is relatively remote. If there is no self driving car, it is not recommended to stay. The hotel does not reflect the four-star standard in terms of decoration design and planning. In fact, the foundation is very good, but it makes it feel wild. For example, the lawn in front of and behind the main building of the hotel is not well used. The waiter in the hotel is very…
1. The appearance is old, the breakfast is average, and it is free to upgrade to a luxury room. I think it is pretty good. The hot water is very slow, and it takes a long time to get it. There seems to be a problem with the credit card used by the front desk for checking out. I don't know why I haven't received the payment information of the credit card so far.
1, "The hotel is not very convenient from the downtown public transportation, and the taxi fare is generally 11-12 yuan. The breakfast in the hotel is very rich and considerate. There are porridge, noodles, cakes, etc., and milk is fresh milk."
1. The room is average. The business king bed room is separated from the bathroom by a glass wall. The decoration should also be a four-star hotel. The TV set is relatively small. Besides, there are only CNN and BS2 satellite channels abroad. The parking lot is free of charge
1, "The location is in the center of the city. It is convenient to travel and has a good service attitude. Living in a luxury standard room, it is spacious, newly renovated, and sanitary. Free mineral water and coffee are provided with a convenient and user-friendly stationery bag. I bought one, hehe! The breakfast is rich, the hot dried silk tastes good, the entertainment facilities are complete…
1. "The newly renovated hotel has very new and good rooms. As a gold card member of Marriott, it is very good to fully enjoy the treatment of gold card. There are not enough varieties of breakfast."
1. The four-star hotel has been evaluated, but the room facilities are still slightly old, and the details should be kept at the four-star level, such as the quality of disposable slippers, dental appliances, and faucets; The service level rose rapidly. After listening to the taxi driver and commenting on the four-star service, the waiter was quite enthusiastic, but felt that more efforts should …
1. We booked an administrative standard room online, which was guaranteed by credit card, but when we arrived, we were told that some guests had not checked out, so we changed it to a normal suite. But the hotel is OK, providing free Internet access and two free breakfasts.
1, "I like this hotel for the second time. The intercontinental location is very good, right next to the Victoria Sea and Starlight Avenue. The room and the lobby of the hotel are all floor to ceiling glass windows with panoramic views, especially at night. The price is not small. Ctrip booked 2400 for three nights, excluding breakfast. If not, it would cost 3500 for one night. I have stayed ther…
1. It is a very good hotel, and the service is also very considerate. I appreciate the service consciousness of Hong Kong people.
1. The best value for money is the invincible sea view of the sea view room! The glass window on one wall of the room offers a panoramic view of the beautiful Victoria Bay. The hotel service was also very good, very friendly and considerate. I didn't feel the discrimination against the guests I had heard before. We arrived at the hotel at 11:00 a.m. and could not check in until 14:00 p.m. as requ…
1. "The sea view room really deserves its reputation. You can see the scenery of the whole Hong Kong Island. The service is also very considerate. The transportation is also convenient. The cost of taking a taxi to Hong Kong Island is high, and shopping is very convenient. There is SOGO next to the hotel. In general, it is a very good hotel. It is definitely worth staying."
1. The sea view room has a very beautiful view. Although the price is expensive, it is worth it.
1. The hotel is of high quality and superior environment. It is still a very good hotel in Hong Kong
1. The room, environment and service were all OK. It's just that the Internet is not free, HK $156/24h!!
1. I didn't notice the notice that the hotel was being repaired when making a reservation. It's a pity that the most distinctive roof swimming pool didn't enjoy it. I hope Ctrip can make the logo clearer in similar situations.
1. The whole hotel is old style, but the design of the hotel rooms is very modern and clean. Except that the area is relatively small (whether it is an administrative floor or an ordinary floor, it seems that the size is the same), I am satisfied with everything else.
1, "The overall feeling is very good. The guest room has about 22 floors, and the floor is high enough to see farther, but there is nothing beautiful outside the window. Hehe... The service is very good, it's on call. When I first checked in, a waiter asked me if I wanted to clean the room. It's really warm. The housekeeping department will help you with whatever service you need, but there are t…
1. Maybe I really came back from Sanya. I think the standard of 4-star is obviously different! The hotel rooms are very clean, but the facilities are a little old. Many places look "rotten". The facilities provided are also very average. There are no highlights. It's a place to sleep! The location of the hotel is very good, facing the street and located in the downtown area. It is very convenient…
1. The environment was pretty good, and the service was pretty good too. The environment is similar to Shangri La next door, but it is much cheaper. I wanted to swim, but was told that the swimming pool was not open for decoration, so I was depressed. The receptionists are stingy with their smiles. Once arrived by Mazda, there was no service at the gate; Once we arrived by imported Audi, someone …
1. Only the 20th floor of the hotel is newly decorated. I feel it is pretty good. The room is clean and tasteless. When CHECKOUT saw that others had the same room type, it was only 250 yuan~~Alas, it seems that Ctrip has made a lot~~Hey hey
1, "I often go to Haikou on business, but I have never stayed in the hotel. It looks ordinary. In fact, the hotel is really good. The room is newly decorated (I live in the business floor on the 20th floor) It's very clean, sound insulation is also very good, and basically I don't hear the sound of the road. The sound of the air conditioner is a little loud, ha ha, but the power supply of the Int…
1. The hotel is located in the city center. The room facilities are simple and elegant. Very emotional. The interior is like the interior layout of the old Shanghai Hotel at the beginning of last century. Hot spring is also good! I'll go again next time. I live in room 2005.
1. I stayed in a single room (big bed). The room and bathroom are not very large, but they are enough and easy to use for one person; It is clean and tidy, and the Internet is free (the computer needs to be provided by yourself); It is very good for hotels located in the city center to have this price, and it would be better if they could include breakfast.
1. As everyone said, the whole hotel has a musty smell. It is estimated that the carpet and unsealed windows cannot be opened. Netizens who have requirements for room smell should never stay in this hotel. However, the hotel is located in the center of Haikou, which is convenient for shopping.
1. The LCD wall mounted TV has been newly renovated, which is very good. However, the hot water in the hotel is hot spring. The water is not very big, and it feels sticky, which is the only beauty in the room. The buffet, perhaps due to its cheapness, took a long time to run, and more guests came, but the quality and service declined a lot.
1. The transportation is convenient, the room is clean, and basic household appliances are equipped. The wedding day needed red sheets. The night before yesterday, they called the front desk. They replied that they would go to the warehouse to find them. Unexpectedly, they sent them and arranged them the next day. Their attitude was pretty good!
1. Check in this hotel for the second time. Overall, it's pretty good, but it can't provide free broadband Internet service. The price of broadband Internet access is exorbitant 50 yuan a day. It's not an affordable price. Overall pretty good
1. Broadband charges are too high here. 1.5 yuan per minute. More than 30 minutes is a day. At present, when many hotels use broadband for free, it seems inappropriate. Even if the charge is less than 10 yuan, I think it is better. Preferably, there is no charge. This will make more use of the guests. Supplementary comments on August 25, 2006: By the way, the air conditioner in this hotel is very…
1. We stayed in the business king size room, which is the most expensive room. But once the door is opened, the temperature difference is at least 15 degrees! There is a wall mounted air conditioner in the room! Because I was just going to have a rest at night, I thought about it when I went out in the morning and turned off all the air conditioners.
1. Very good hotel, very good service. My husband has always been very picky about the hotel, but this time he really has nothing to say! Supplementary comments August 6, 2008: The hotel restaurant is being renovated, but it does not affect the accommodation.
1, "The location is very good. Take a taxi to Xintiandi Bar Street or Hang Lung Plaza for more than ten yuan. The reception attitude at the front desk is good. The lobby is very beautiful. The room also provides fruits and snacks, and you can park for free. The only problem is that the room is not very large. There is a primary school across the window, and there is no scenery to speak of. Becaus…
1. After staying for one night, the service was up to standard, warm and considerate. The room was retro and comfortable, but the layout was slightly compact. The only fly in the ointment is that after I left the store, I found that the mobile phone charger was left in my room. I called the front desk and asked that the front desk didn't know about it. After careful searching, the waiter and clea…
1,1. The hotel has just been decorated, very good; 2. The hotel has a high technological content: a large TV can be used as a TV or a computer display screen. It is the first time to see such a hotel TV with wireless keyboard and computer when sitting in the room. In addition, it has convenient broadband and power supply, which is very suitable for business people. In addition, the sitting toilet…
1. The room is not big, and it is standard. The service in the north is really not flattering. After CHECK-IN, there is no waiter to take your luggage to your room. There are no hotels around. You can go to Yonghe Soymilk Store on the road between Marriott and Sheraton for breakfast. It's very cheap.
1. I felt that the service staff's work attitude was not as good as before, and the overall work enthusiasm was not as professional as other Sheratons. Because the room I booked was full, I was upgraded to the executive suite. This was a good arrangement, but I don't know why there was a noise in this room sooner or later; My friend, who lives on the floor below me, was woken up in the morning by…
1. The environment is good, but when I went to live in the afternoon, I actually booked three rooms and didn't clean one.
1. The hotel is a little old. I don't know when it was built. I feel it is far from a five-star standard room. It's not much different from a three-star hotel. It's just a little big. The service is pretty good
1. Sheraton is good on the whole. Compared with this hotel, it has been a long time and is quite old. Breakfast was good. However, this is OK in the Northeast.
1. The hotel is generally good. The building structure is a little strange. Ctrip placed an order, but the internal coordination of the hotel was slow. After arrival, it took a long time to get the front desk; The male waiter at the front desk is very poor, and he is very weird. There are many famous luxury stores on the first floor from 9 am to 9 pm, which is good. You can visit them when you ha…
1. Before I checked in to Sheraton, I asked some questions by phone. The receptionist, Ke, not only received me, but also made detailed arrangements for my trip to Shenyang and left information at the front desk. Thank you again here. I felt very good after I checked in. The exhaust fan in the room is too loud, affecting sleep!
1, "The environment is good, but the service speed is a little slow. I hope the service staff will smile more."
1. Sheraton Shenyang, a good hotel: 1) It is located in the center of the city, on Youth Street, opposite Xiwu, and next to Marriott. Although Marriott has a beautiful appearance, it doesn't look like Sheraton. Sheraton's lobby is very beautiful, and there are many famous stores, including Canali, EA and Montblanc. 2) The room is not big, but you can see the street view of Youth Street. The batht…
1, "The location of the hotel is good, the room facilities are too old, and the breakfast is OK. The overall feeling is average"
1. The room is spacious, the service is average, the check-out is slow, and the breakfast is OK, but the Chinese restaurant on the second floor is expensive. The rooms near 01 and 02 are often shocked by bowling below, like thunder. But on the whole, the hotel with breakfast and broadband in Tianjin is cheap. This hotel can be recommended.
1. It's economical. The towels in the room are not white enough. You must live on the 8th floor or above. The KTV on the 4th floor is too noisy!
1, "The room is very good, the price is also good, the service is also good, but it's not easy to park."
1. It has a good geographical location and convenient transportation. The room was comfortable and the service was very good
1, "The doors of ordinary standard rooms are too bad, including the bathroom door, and the key card is not easy to use! It's better to stay in the economy room! The breakfast is not bad!"
1. "The service attitude at the front desk was very good. The room size and cleanliness were also very good. It was OK to notify the staff to postpone the check-out until 3:00 p.m. on the morning of check-out. They will still check in if there is a chance near Vientiane City."
1, "Hotels with excellent cost performance ratio have excellent room facilities, excellent front desk service, business rooms, and slightly hard beds..."
1, "The hotel is located in a building near the Vientiane City of Luohu, which is very inconspicuous. However, the interior decoration of the hotel is very warm, very good. The service is also considerate. When I go out in the morning, I throw the computer line on my desk, and the waiter also helps me sort it out. The only disadvantage is that there is no VIEW, and there is no scenery outside the…
1, "The hardware is good, and the business hotel has its own features. The service is medium, the front desk is good, but the room service is average. The price is relatively expensive, but most of the executive rooms are like this. The location is a bit difficult to find, and taxi drivers can't find it. They say it is near MIXC, but they have to go around"
1. The hotel rooms are very good, and the location is also very good. It's right behind the MIXC. It's very convenient to visit the MIXC at night, and the transportation is very convenient.
1, "The hotel with excellent cost performance ratio has excellent room facilities. The bathroom is divided into three parts, the shower room, the bathroom and the dressing room, which are very clean. The decoration is very European style. The pillow is comfortable, the bed is also large, and the clothing is not good. The commercial room is equipped, next time!"
1. The hotel with excellent cost performance ratio has excellent room facilities. The bathroom is divided into three parts: shower room, bathroom and dressing room. They are very clean. The decoration is very European style, but the pillow is not comfortable. One is too low, and the other is too high.
1. Although the geographical location is very downtown, it is not very convenient to get in and out except for taxi. It is quite close to MIXC.
1, "This is the second time I have checked in. It's a very good hotel. It's very clean and tidy. The bathroom in it is my favorite decoration. When I returned to the hotel at 12 o'clock in the evening, I wanted to eat something. The chefs have already left work. They ordered a fruit salad in the water bar, and just saw an apple. They asked the chef if they could just cut the apple and leave nothi…
One to four years ago, my German colleagues and I thought it was very good. This year, I chose another big club, which is still very good. The buffet has a wide variety, spacious rooms and fast broadband. One word: value!
1. Not bad. It's the best hotel I've ever stayed in. I feel at home. Let me complain, God! It's more comfortable than my family. How can I sleep
1. The rich families are very nice to birthday guests. There are 11 roses and a bottle of St. Petersburg dry red. That card with the signatures of many staff members will make you feel warm.
1. It is puzzling that the most affordable 635 suite preferential policy is not applicable to CTRIP. Call it directly, it will have 638 yuan of preferential suites, many preferential policies.
1. During the Canton Fair, there was no free drink, no free long-distance call, but I still wanted to stay~~However, after the Canton Fair ended, I still did not restore the previous 635 yuan coupon, free drink bar, and free long-distance call service, which was a bit puzzling. I haven't been there for some time.
1. I miss rich families most when I live here and there. In particular, they have a favorable attitude towards regular customers. When checking in, it can be done without the pre-sale right or certificate. Time is fast.
1. I checked in for the second time. I felt it was good. The gym and swimming pool were both very good. But there was a little problem with this check in. At six o'clock in the morning, a waiter opened the door for no reason and then went out again. A few minutes later, he came in again and asked if he would check out! I sent a flower to my room that night as an apology. It felt good! In addition…
1, "The hotel service is pretty good, and it is already very good in Yibin. But Ctrip's price is not at all. Luxury B discounts 265 at the front desk, and Ctrip 263. I hope Ctrip will greatly improve the problem of high prices in the future, so that it can be attractive!!"
1. The hotel has a 2-star listing, but it's really good. It's worth the money. In the city center, the transportation is convenient. It's very convenient to go out and take a tricycle, but it's not very convenient for self rickshaws. There is no parking lot.
1. Generally, it is OK. Transportation and shopping are convenient. The equipment in Yibin is OK. Breakfast was terrible. I went there three times, one week each time... You can't eat there the second time... It's the same every day, and there are so few varieties... Well, there is only one set meal for dinner...
1. The hotel is very large, the service is too poor, and the room on the A floor is also old, so I will not stay next time. The environment is very good. Maybe golfers can bear it.
1, "Yes, I have stayed for several times, and it is worth recommending! There is a supermarket outside the hotel, which is very convenient for shopping:)"
1. The city of Yibin feels dirty, messy and small, but Yibin Grand Hotel offers a relatively luxurious enjoyment, which is much better than the other two 4-star hotels in the same city, but there are still some shortcomings, such as slow elevator operation, inconvenient parking, and too obscure access to the hotel (it is not easy to find those who have never been there).
1. The price is proportional to the facilities. This time I made a reservation for the customer, and the feedback was pretty good.
1. Apart from the fact that the traffic is a little inconvenient, you have to rely on the taxi or your own car. Other aspects are also very reasonable
1, "It's very quiet. The sound insulation facilities are good. The waiter's attitude is very good. I will choose here next time"
1. The environment is very good and the location is good. The guests always stay here. I should be very satisfied.
1, "The room is very large and clean, and the service is also very good. It's very cheap in five stars. I will come again next time."
1. The first time to book a hotel, I always complained
1, "Very good hotel, cost-effective, clean and quiet hotel rooms"
1. The room is very large and comfortable, the service is also very good, and the price is also cheap in five stars
1. The hardware is very good. My foreign friends are very satisfied. It's just that the classification of house prices is complicated.
1, "The interior environment is OK, the green area is still very comfortable, and the breakfast is poor. The next page>>Free registration website navigation hotel index service description About Ctrip's recruitment of talented agents to cooperate with advertising business Contact us Copyright1999-2008, ctrip. com. allrightsreserved."
1. "The western food in the hotel is very bad, especially the buffet in the evening. The barbecue is very special."
1, "The hotel feels like a peach in the world, and the environment is very beautiful. If it has its own way, the transportation is not very convenient."
1, "What impressed me most was that when I opened the curtains -- it was a golf course outside -- it was very pleasant! The room was also good, but it was not convenient to park -- it was too far away, and it just rained again."
1. Nowadays, broadband charges even more. It costs more than 80 yuan to send two emails, which makes me crazy about money. The hotel rooms are average, just like this, the transportation is convenient. The only good thing is the cafeteria. When I went there, it was really good at half price. The price performance ratio was high. Anyway, I won't stay for the second time
1, "Very good, very good service, very good environment, very good price, very satisfied"
1. The overall environment of the hotel is unspeakable, except that the rooms are not sound insulated. Ha ha, my next door is very busy!
1, "I booked a senior room on the VIP floor [including breakfast] from May 8 to 9, which gave me the feeling that: -- the geographical location is excellent, just near the Financial Street -- the room is very large and comfortable, including double breakfast, which is a little more than 1000 yuan, very cost-effective -- the only bad thing is that the lobby is being decorated, which is a bit rude,…
1. It can be seen that the quality of hotel facilities is not very good, and the details are very rough. Service was fairly good
1, "The hotel is very good, the location is also good, and the waiter at the door is also very friendly. It's just that recently the hotel was being renovated, and I started to knock on the wall at more than 8:00 in the morning, which woke me up and affected my sleep a bit. But it's still very good overall, and it's worth staying."
1. It has a good geographical location and is quite close to the company. Every time the manager of Zhuhai comes here, he will designate the hotel.
1. Although the hotel's facilities are getting a little old, the service staff at the front desk of the hotel feel very comfortable, and the waiter at the door is also very service conscious. It seems that my taxi ride is not going well, so he called a taxi for me, because neither I nor the taxi driver know where the destination is, and he asked other people where I want to go. In a word, it feel…
1, "The first time I stayed in a hotel in Zhengzhou, I was blackmailed by a taxi driver when I went there. Later, I learned that a taxi in Zhengzhou can be negotiated. 90 yuan from the airport to Zhongzhou Crown is enough. If you are a price expert, I think 80 yuan will be enough. A free swimming pool is very good, but it is not easy to find a swimming pool. Besides, you should be careful about t…
1. The hotel is good on the whole, but the location guidance is poor. I found some facilities in the hotel and asked several people to find them. For example, I was asked to look for the swimming pool for a long time, which was too far
1, "Generally speaking, it's OK. I've lived many times. The main attraction is that I can make three hours of long-distance or local calls every day. The TV is broken. I hope it can be replaced."
1, "The room is fairly good, but the price performance ratio needs to be improved. The price of 688 yuan can be used in other hotels in Zhengzhou."
1. I lived in Zhongzhou when I was on a business trip last year. I took the customer there and felt it was good. So I chose this one again for business trip this year.
1, "Every time I go to Henan, I basically stay in this hotel. The environment and facilities are good, the room is spacious, and the service is also good!"
1, "Comments on Kanghsi Travel in China: Price: 688 yuan for deluxe rooms, plus breakfast; as a Crowne Plaza Hotel, it can hold more than 500 hotels, but the hotel is in the state and has few hands, so the cost performance ratio is normal; * * * * Transportation: The hotel is located at the junction of Jinshui Road and Road 3, and the taxi fare is 120 yuan, while the civilian flights are on the s…
1, "I think it's OK. It's just that there is no scenery outside the window of the second floor building, which is blocked by some buildings, maybe advertisements, etc. It's OK at night. There are curtains, but I can't compliment you during the day. I ordered it online, and it said that there was a fruit gift, because there were colleagues who boasted that there was a fruit gift, but I didn't have…
1. The front desk service was very good. When we went, it was the peak time for check-out. The lobby manager came to help us deal with it. When we went to take the elevator, we went in the wrong direction, and she came after us to remind us. The buffet on the ground floor is very economical. The lunch of 88 yuan does not include the service charge. The breakfast was in the same place. It was also…
1. I went to Zhengzhou several times and stayed here. Once, I stayed in the room on the first floor on the left side of the lobby. The hotel is very quiet and the service is also good. Although the receptionist is not beautiful, the service is of a very high standard. Check out is extremely fast. Free shuttle bus when you get off the plane to the hotel, and you have to pay when you go to the airp…
1, "I stayed in Gangwei from December 23 to 26. The purpose of this trip is Christmas shopping, so I feel it is very convenient. The countdown to zero activity on Guangdong Road on Christmas Eve is held downstairs in my room. The hardware facilities in the hotel are good, the bathroom is large, fresh fruit is delivered every day, and the service is good. The only disadvantage is of course the pri…
1. The location is first-class, the room facilities are relatively old, and the price is getting higher and higher. It seems that Ctrip's advantages are less and less obvious.
1. The main reason for going to Hong Kong is for shopping. The most satisfying thing about staying in this hotel is that its location is very convenient (especially for the mother who takes the baby to travel). You will not be confused because the baby is too young to walk much. Because this hotel is located in the most prosperous harbor city in Hong Kong, its hardware and software absolutely mee…
1. The location is very good. It can't take 5 minutes to walk to the Confucian Temple and Qingliang Temple. Many buses around are very convenient. It's just that taxis don't like to go there (the roads in the old city are narrow and traffic jams are preferred). Because it's an old hotel, the facilities are old,
1. It is rare to have such a large room in Hong Kong, but the bathroom is a little old. This is the best choice for those who go to Hong Kong for shopping, because the hotel is in the harbor city. It is hard to visit the huge harbor city for a week. If you are tired, you can go to the hotel to have a rest
1. Generally speaking, it was OK! The room is a little smaller, the bed is not too big, the furniture is a little old, but it is clean. The service was fairly good, and the taste of the food was also good. It's economical!
1. Although the old four-star hotel can vaguely feel the scale of the former foreign-related hotel in all aspects, it is a pity that the equipment is extremely old. Nevertheless, the service of the hotel is very considerate and the response is also very warm. Maybe it is the service attitude that makes up for the above shortcomings! I stayed for two nights, and the hotel gave me fruit platters fo…
1. The hotel is in a good location. As a quasi four-star hotel, the lobby is relatively small; Although the room facilities are a little old, they are very clean and the service is very good; Breakfast was OK, but the price was high! Generally speaking, it can be recommended
1. The room environment was OK. There was also a LCD computer and fruit at night. I had to take some steps to shop around. It was OK on the whole
1. Apart from some old facilities, it is a good hotel. Especially the service was of a very high standard! The waiter in the restaurant ordered the wrong food, which resulted in more than 50 yuan in the bill. It didn't take a minute to correct it immediately. Very good!!
1. I checked into the hotel on April 29, 2008. I felt that the environment was comfortable, the hotel facilities were complete, and the service industry was very considerate. It was very close to the railway station and Quancheng Square, but there was no breakfast in the discount room. I thought that the breakfast standard should be lowered and included in the discount room rate. Overall, I felt …
1. The location is good, the service is also very good, and there are several pillow options available, including a complimentary hot drink at night. It's very considerate, and I will stay in the future.
1. The hotel is OK. It seems to be in the same building as the bank. The hotel's hot air conditioner gathered heat. At first, I didn't know it. It was turned on a lot and I was woken up by the heat in the middle of my sleep, which was a bit exaggerated. The bathroom is huge, but the room is small. The facilities in the house are a little old
1. I stayed in a business king size bed room, which has a high cost performance ratio. The room also has a LCD computer, which allows free Internet access. The service is more user-friendly. The fruit tray is free at night, and a flower is placed at the bedside, which makes me feel warm. The room has all kinds of snacks and drinks, but the furniture is a little old~~~
1. Good hotel. I always live in Quanzhou. The breakfast was very rich. There is a bus station at the entrance, which is convenient for transportation. (However, the bus is from China Travel Service and has a bad habit. They like to travel around the city to pick up passengers. It takes a lot of time to travel from one station to another. Business guests would better go to the central station to t…
1. The room is pretty good, and the decoration looks very comfortable. However, the computer in the business room is infected by viruses, and it is unpleasant to surf the Internet. There will be harassing calls at night
1. The hotel facilities are very old (Ctrip reminded us when booking), and the hygiene is also average, which does not match the four-star standard; The room key is a card check (chip) type. Because it has been used for a long time and has poor contact, it is often difficult to open the door. Even the waiter has to try several times to open the door, which is very inconvenient.
1. This hotel is very good, the environment is OK, the price is average, not the lowest price.
[truncated: 6,321 more rows]
